# Supplementary material
Source: Royal Society of Chemistry journal article supplement (doi:10.1039/d6gc00900j)

## **ELECTRONIC SUPPLEMENTARY INFORMATION**

### **Process-Optimised Access to Triarylamines through Catalytic Dehydrogenative Aromatisation**

Giulia Brufani,<sup>‡a</sup> Antonio Vella,<sup>‡a</sup> Anastasiia M. Afanasenko,<sup>b</sup> Chao-Jun Li,<sup>b</sup> Luigi  
Vaccaro<sup>\*a</sup>

<sup>a</sup>*Laboratory of Green S.O.C. – Dipartimento di Chimica, biologia e Biotecnologie  
Università degli Studi di Perugia, Via Elce di Sotto 8, Perugia 06123, Italy  
luigi.vaccaro@unipg.it*

<sup>b</sup>*Department of Chemistry, and FQRNT Centre for Green Chemistry and Catalysis  
McGill University, 801 Sherbrooke Street West, Montreal, QC H3A0B8, Canada*

- 1. General Remarks**
- 2. Experimental Procedures**
  - 2.1. General procedure for the synthesis of triarylamines**
  - 2.2. General procedure for the dehydrogenative aromatization of *N*-cyclohexyl diarylamines to triarylamines**
  - 2.3. General procedure for the synthesis under flow**
  - 2.4. Catalyst recycle**
  - 2.5. Leaching test**
  - 2.6. Hot filtration test**
- 3. Results and Discussion**
  - 3.1. Optimization of the reaction condition under batch**
  - 3.2. Optimization of the dehydrogenative aromatization of *N*-cyclohexyl diarylamines to triarylamines**
  - 3.3. Time course of the reaction**
  - 3.4. Catalyst recycle**
  - 3.5. Hot filtration test**
  - 3.6. Substrates scope**
  - 3.7. Pd/C characterization**
  - 3.8. Flow setup**
  - 3.9. Green metrics evaluation**
- 4. References**
- 5. Spectral characterization data**

## 1. General Remarks

The reagents used in this work were purchased from Merck and Zentec and used without further purification or activation procedures. Palladium on charcoal (Pd/C) was purchased from Merck (205699-50G, 10 wt% loading, matrix-activated carbon support). PS-TsOH (2.5 mmol/g) was purchased from Merck. Cyclopentyl methyl ether (CPME) was purchased from Zeon. The solvent was not dehydrated before use.

Molecular oxygen (O<sub>2</sub>) was supplied via a balloon filled with the gas, directly connected to the reflux condenser.

In the flow setup, the reaction mixture was introduced using a high-performance liquid chromatography (HPLC) pump, Shimadzu LC-40D.

TLCs were visualized under a UV lamp ( $\lambda_{\text{max}} = 254 \text{ nm}$  or  $365 \text{ nm}$ ) and/or by staining with a potassium permanganate or ninhydrin solution. Flash column chromatography (FCC) was performed on Merck silica gel 60 (230–400 mesh), and the solvent systems used are indicated in parentheses.

Gas chromatography (GC) analyses were conducted using an Agilent 6850 and a Shimadzu GC-2010 Pro, both equipped with a 5-MS column and helium as the carrier gas. The temperature ramp involves an initial time of 1 minute at 50°C, followed by a 10°C increase every minute until a final temperature of 300°C is reached, which is maintained for 5 minutes.

Gas chromatography-mass spectroscopy (GC-MS) analysis was conducted using an Agilent 8890 GC system, 5977 GC/MSD instruments, and a Hewlett-Packard HP 6890N Network GC system/5975 Mass Selective Detector equipped with an electron impact ioniser at 70 eV.

Melting points were measured on a Buchi 510 apparatus.

Cyclopentyl methyl ether distillation was performed using BUCHI Glass Oven B-585 Kugelrohr.

Elemental analysis was performed with the UNICUBE Elementar instrument.

TEM analyses were performed on a Thermo Fisher TALOS F200X G2 operating at an accelerating voltage of 200 keV. For sample preparation, a small amount of material was dispersed in isopropanol in a centrifuge tube and mildly sonicated for ~15 min. A few drops of the resulting suspension were then drop-cast onto a copper TEM grid coated with a holey carbon film. After solvent evaporation, the grid was introduced into the microscope for characterization.

<sup>1</sup>H-NMR, <sup>13</sup>C-NMR, and <sup>19</sup>F-NMR analyses were obtained using a Bruker DRX-ADVANCE 400 MHz spectrometer, with CDCl<sub>3</sub> as the solvent and reference standard. All the NMR Spectra reported present around 95% purity.

Centrifugation was carried out using a Beckman Coulter Allegra 64 R centrifuge for the recovery of the catalyst.

The Agilent Technologies 4210 instrument was used to determine the amount of metal lost via microwave plasma atomic emission spectroscopy (MP-AES) analysis.

## 2. Experimental Procedures

### 2.1. General procedure for the synthesis of triarylamines

In a 10 mL round-bottom flask equipped with a magnetic stirrer, Pd/C (10 mol%; 53 mg), TsOH (10 mol%; 8.6 mg), CPME (1 M; 0,5 mL), **1** (0.5 mmol), and **2** (5 mmol, 10 equiv.) were consecutively added. The reaction was stirred for 16 hours at 140°C in an open vessel under reflux. Then, an O<sub>2</sub> balloon was connected to the apparatus, and the reaction was stirred for an additional 6 hours at 140°C. Pd/C was filtered from the reaction mixture and washed with CPME (10 mL). The pure product was obtained after column chromatography using silica as the stationary phase and ETP as the eluent.

### 2.2. General procedure for the dehydrogenative aromatization of *N*-cyclohexyldiarylamines to triarylamines

In a 10 mL round-bottom flask (10 mL) equipped with a magnetic stirrer, *N*-cyclohexyldiarylamines (**5**) (0.5 mmol), Pd/C (10 mol%, 53 mg), TsOH (10 mol%, 8.6 mg), and CPME (1 M, 0.5 mL) were consecutively added. An O<sub>2</sub> balloon was connected to the apparatus, and the reaction was stirred for 6 hours at 140°C under reflux. Pd/C was filtered from the reaction mixture and washed with CPME (10 mL). The pure product was obtained after column chromatography using silica as the stationary phase and ETP as the eluent. (Figure 2.d)

### 2.3. General procedure for the synthesis under flow

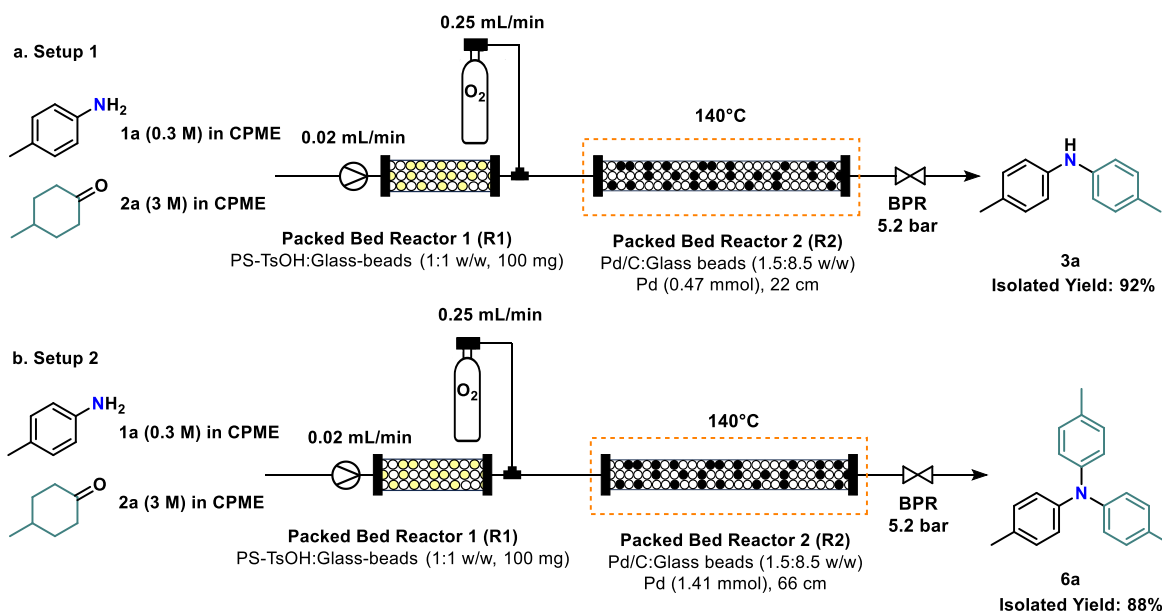

**Scheme S1.** a. General setup for the synthesis of **3a** in a continuous flow apparatus (Setup 1). b. General setup for the synthesis of **6a** in a continuous flow apparatus (Setup 2).

**Setup 1:** The p-toluidine (**1a**) (5 mmol, 530 mg) and 4-methylcyclohexanone (**2a**) (50 mmol, 10 equiv., 6 mL) were dissolved in CPME (16.7 mL, 0.3 mol/L). The PS-TsOH (50 mg, 2.5 mmol/g) was mixed with 1 mm glass beads in a 1:1 ratio and packed into a 4.5 cm stainless steel reactor with an internal diameter of 2 mm (R1). The Pd/C 10 wt% (0.47 mmol of Pd) was mixed with 1 mm-diameter glass beads in a 1.5:8.5 ratio and packed into a 22 cm stainless steel reactor with an internal diameter of 4 mm (R2). The R1 is placed at room temperature. The R2 is placed at 140°C. Both reactors were placed in a laboratory-made continuous-flow system equipped with a T-junction to introduce gaseous O<sub>2</sub> (0.25 mL/min) upstream of R2, thereby establishing a slug-flow regime. The entire system was equipped with a 5.2 bar BPR. The solution of **1a** and **2a** in CPME was delivered to the system via an HPLC pump at an effective flow rate of 0.02 mL/min. After a residence time of 200 min, a complete conversion to **3a** was achieved. After distillation of CPME and recovery of the unreacted **2a** (82%), CPME (5 mL) was added, followed by an aqueous solution of HBF<sub>4</sub> (48 wt%, 1.5 equiv.). Precipitation was completed by adding cold heptane (5 mL), and the resulting solid was collected by filtration.

Subsequently, aqueous NaOH (3 M, 2 mL) and the recovered CPME (5 mL) were added. After centrifugation, the distillation of CPME afforded pure **3a** (Yield: 92%). The solvents CPME and heptane used in the procedure were recovered by distillation (95% and 92%, respectively) and reused.

**Setup 2:** The p-toluidine (**1a**) (5 mmol, 530 mg) and 4-methylcyclohexanone (**2a**) (50 mmol, 10 equiv., 6 mL) are dissolved in CPME (16.7 mL, 0.3 mol/L). The PS-TsOH (50 mg, 2.5 mmol/g) was mixed with 2 mm glass beads in a 1:1 ratio and packed into a 4.5 cm stainless steel reactor with an internal diameter of 2 mm (R1). The Pd/C 10 wt% (1.41 mmol of Pd) was mixed with 2 mm-diameter glass beads in a 1.5:8.5 ratio and packed into a 66 cm stainless steel reactor with an internal diameter of 4 mm (R2). The R1 is placed at room temperature. The R2 is placed at 140°C. Both reactors were placed in a laboratory-made continuous-flow system, equipped with a T-junction to introduce the gaseous O<sub>2</sub> (0.25 mL/min) upstream of R2, thereby establishing a slug-flow regime. The entire system was equipped with a 5.2 bar BPR. The solution of **1a** and **2a** in CPME is delivered to the system via an HPLC pump at an effective flow rate of 0.02 mL/min. After a residence time of 600 min, a complete conversion to **6a** was achieved. After distillation of CPME and recovery of the unreacted **2a** (82%), CPME (5 mL) was added, followed by an aqueous solution of HBF<sub>4</sub> (48 wt%, 1.5 equiv.). Precipitation was completed by adding cold heptane (5 mL), and the resulting solid was collected by filtration.

Subsequently, aqueous NaOH (3 M, 2 mL) and the recovered CPME (5 mL) were added. After centrifugation, the distillation of CPME afforded pure **6a** (Yield: 88%). The solvents

CPME and heptane used in the procedure were recovered by distillation (95% and 92%, respectively) and reused.

#### **2.4. Catalyst recycle**

After the reaction was complete, the Pd/C catalyst was filtered under vacuum, washed with CPME (10 mL), and dried for 3 hours at 130°C under vacuum. Then the reaction was repeated.

#### **2.5. Leaching test**

After the reaction was completed, the Pd/C was filtered under vacuum and washed with CPME. For the reactions performed under flow, this step is not required. The reaction mixture was dried under vacuum, then dissolved in 2 mL of aqua regia, and digested at room temperature for 2 h. The reaction mixture was transferred into a 10 mL graduated flask, and Milli-Q water was added to reach the final volume. The residual solids present were filtered off, and the MP-AES 4210 instrument analysed the sample.

#### **2.6. Hot filtration test**

In a 10 mL round-bottom flask equipped with a magnetic stirrer, Pd/C (10 mol% %; 53 mg), p-TsOH (10 mol%; 8.6 mg), CPME (1 M; 0,5 mL), **1a** (0.5 mmol), and **2a** (5 mmol, 10 equiv.) were consecutively added. The mixture was kept under reflux at 140 °C. After 45 minutes, the Pd/C was hot-filtered, and the mixture was stirred for an additional 15 hours. The conversion was evaluated by gas chromatographic analysis. Then, the reaction mixture was dried under a vacuum, dissolved in 2 mL of aqua regia, and digested at room temperature for 2 h. The reaction mixture was transferred into a 10 mL graduated flask, and Milli-Q water was added to reach the final volume. The residual solids present were filtered off, and the MP-AES 4210 instrument analysed the sample.

The same protocols were repeated after 16 h of reaction, performed under reflux in an open vessel. After Pd filtration, the reaction was stirred at 140°C for an additional 6 h under an O<sub>2</sub> balloon. Then the leaching was analysed.

### **3. Results and Discussion**

#### **3.1. Optimization of the reaction conditions under batch**

The heterogeneous catalyst Pd/Al<sub>2</sub>O<sub>3</sub> was tested instead of Pd/C; however, it produced byproducts and degradation, making it almost impossible to determine the conversion to intermediates and byproducts. Additionally, various acids, including CF<sub>3</sub>COOH, PivOH, and CF<sub>3</sub>SO<sub>3</sub>H, were tested, yielding similarly unsatisfactory results.

### 3.2. Optimization of the dehydrogenative aromatization of *N*-cyclohexyldiarylamines to triarylamines

At this stage, we conducted control experiments on the aerobic dehydrogenative aromatization of *N*-cyclohexyldiarylamines (**5**). In a 10 mL round-bottom flask equipped with a magnetic stirrer, **5b** (0.5 mmol), TsOH (10 mol%, 8.6 mg), and CPME (1 M, 0.5 mL) were consecutively added. The reaction was carried out without Pd/C, and no **6b** was formed (**Scheme S2**).

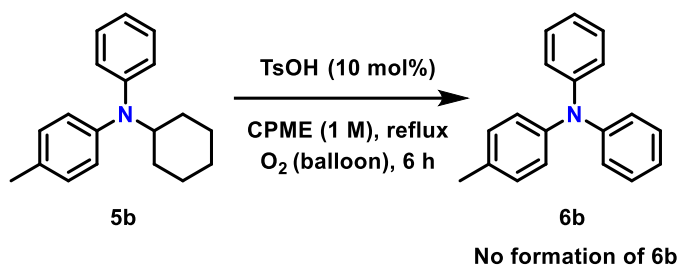

**Scheme S2.** The dehydrogenative aromatization of **5b** to **6b** is performed without the use of Pd/C.

### 3.3. Time course of the reaction

The reaction profile was monitored over time to clarify the product distribution, analyzing both the initial minutes of the reaction and the entire reaction course (**Figure S1**). The product distribution was analyzed by gas chromatography analysis with pure products as standards and GC-MS.

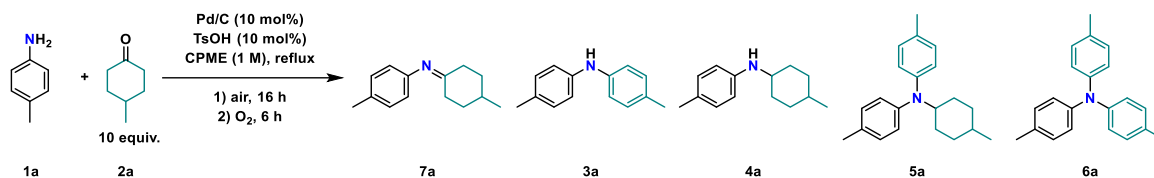

### a. Time course for the first minutes of reaction

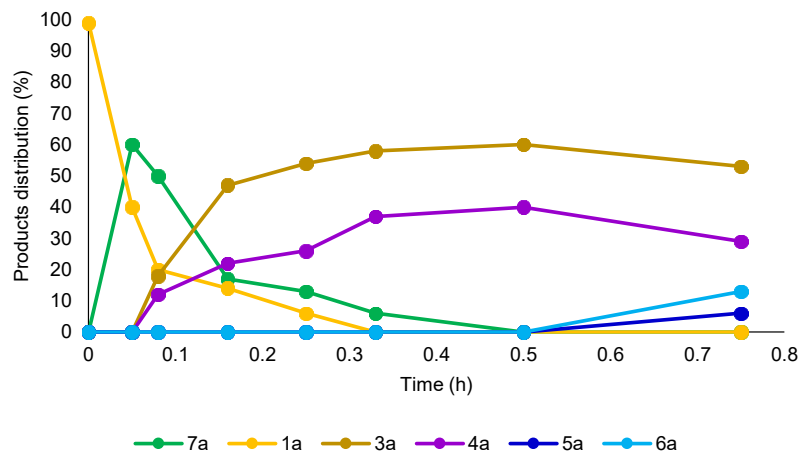

### b. Time course for the reaction

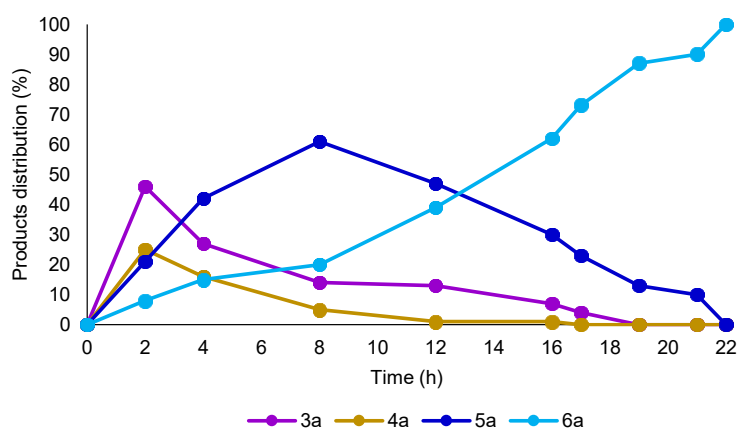

**Figure S1.** Time course for the reaction of **1a** and **2a**. Reaction condition: **1a** (0.5 mmol), **2a** (5 mmol, 10 equiv.), Pd/C (10 mol%), TsOH (10 mol%), CPME (1 M), reflux, 16 h under air, additional 6 h under balloon of O<sub>2</sub>.

### 3.4. Catalyst recycle

The recyclability of Pd/C under optimized reaction conditions was tested. The second run of the process yielded only traces of the desired product **6a**, while the major product formed was **3a** (Table S1).

**Table S1.** Recycle of Pd/C<sup>a</sup>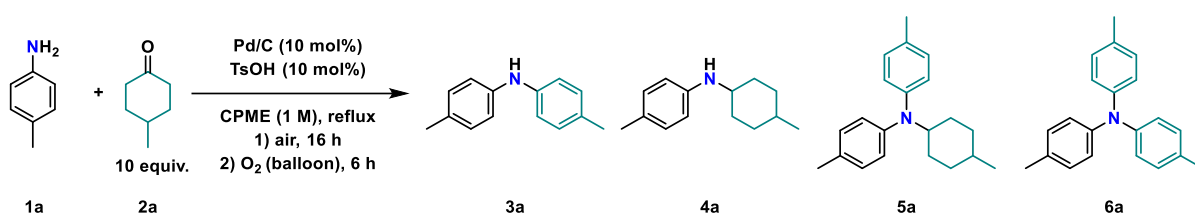

| Entry | Run            | C <sup>b</sup> (%) |    |    |    |
|-------|----------------|--------------------|----|----|----|
|       |                | 3a                 | 4a | 5a | 6a |
| 1     | 1 <sup>o</sup> | 0                  | 0  | 0  | 99 |
| 2     | 2 <sup>o</sup> | 90                 | 0  | 5  | 5  |

<sup>a</sup>Reaction condition: **1a** (0.5 mmol), **2a** (5 mmol, 10 equiv.), Pd/C (10 mol%), TsOH (10 mol%), CPME (1 M), reflux, 16 h under air, additional 6 h under a balloon of O<sub>2</sub>. <sup>b</sup>Conversion determined by gas-liquid chromatographic analysis, the remaining material is unreacted **1a**.

To better understand the reason for the reduced conversion through product **6a**, the catalyst was tested before the addition of O<sub>2</sub>, after 16 hours at 140°C under open vessel conditions with reflux. The recovered Pd/C showed the same conversion after the 2<sup>nd</sup> run. However, a decrease in conversion towards **6a** was observed in the 3<sup>rd</sup> run (**Table S2**).

**Table S2.** Recycle of Pd/C before the addition of the O<sub>2</sub> balloon<sup>a</sup>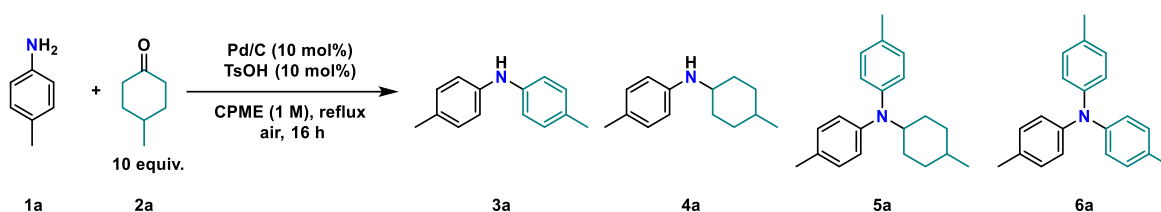

| Entry | Run            | C <sup>b</sup> (%) |    |    |    |
|-------|----------------|--------------------|----|----|----|
|       |                | 3a                 | 4a | 5a | 6a |
| 1     | 1 <sup>o</sup> | 0                  | 0  | 40 | 60 |
| 2     | 2 <sup>o</sup> | 0                  | 0  | 40 | 60 |
| 3     | 3 <sup>o</sup> | 27                 | 27 | 37 | 16 |

<sup>a</sup>Reaction condition: **1a** (0.5 mmol), **2a** (5 mmol, 10 equiv.), Pd/C (10 mol%), TsOH (10 mol%), CPME (1 M), reflux, 16 h under air. <sup>b</sup>Conversion determined by gas-liquid chromatographic analysis, the remaining material is unreacted **1a**.

### 3.5. Hot filtration test

To evaluate the heterogeneous nature of the catalysis, a hot-filtration test was performed after 45 minutes of reaction. Compared to the control experiment, the hot-filtration test showed a shift in product distribution, with a notably higher conversion to **5a**. This effect is attributed to the role of TsOH in promoting the condensation reaction. MP-AES analysis of the hot-filtered reaction mixture indicated a negligible amount of Pd leaching into the

solution, supporting a heterogeneous catalytic mechanism. No significant changes were observed in Pd leaching after hot filtration (**Table S3**).

**Table S3.** Hot-filtration test performed at 45 minutes of reaction.<sup>a</sup>

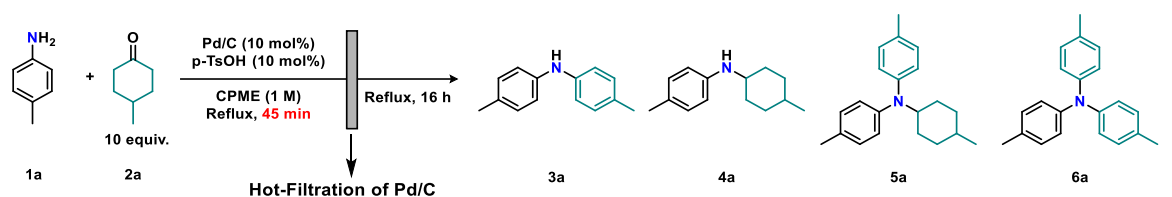

| Entry | Set-up                 | Conversion <sup>b</sup> (%) |    |    |    | Pd loss % |
|-------|------------------------|-----------------------------|----|----|----|-----------|
|       |                        | 3a                          | 4a | 5a | 6a |           |
| 2     | Control Test (45 min.) | 53                          | 29 | 6  | 13 | 0.04 %    |
| 1     | After Hot Filtration   | 35                          | 14 | 34 | 17 | 0.06 %    |

<sup>a</sup>Reaction condition: **1a** (0.5 mmol), **2a** (5 mmol, 10 equiv.), Pd/C (10 mol%), TsOH (10 mol%), CPME (1 M), reflux, 16 h under air. <sup>b</sup>Conversion determined by gas-liquid chromatographic analysis, the remaining material is unreacted **1a**.

A hot-filtration test was conducted after 16 hours at 140°C in an open vessel under reflux, prior to the addition of O<sub>2</sub>. This procedure revealed no significant change in the product distribution, thereby confirming the heterogeneous nature of the catalysis. Analysis indicated that less than 0.5% of Pd leached into the solution during the reaction. No significant variation was observed during the hot-filtration test (**Table S4**).

**Table S4.** Hot-filtration test performed after 16 h of reaction.<sup>a</sup>

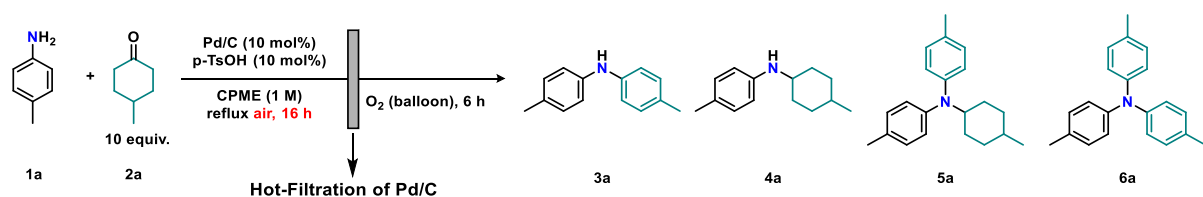

| Entry | Set-up               | C <sup>b</sup> (%) |    |    |    | Pd loss % |
|-------|----------------------|--------------------|----|----|----|-----------|
|       |                      | 3a                 | 4a | 5a | 6a |           |
| 2     | Control Test (16 h.) | 0                  | 0  | 29 | 71 | 0.1 %     |
| 1     | After Hot Filtration | 0                  | 0  | 27 | 73 | 0.2 %     |

<sup>a</sup>Reaction condition: **1a** (0.5 mmol), **2a** (5 mmol, 10 equiv.), Pd/C (10 mol%), TsOH (10 mol%), CPME (1 M), reflux, 16 h under air. <sup>b</sup>Conversion determined by gas-liquid chromatographic analysis, the remaining material is unreacted **1a**.

### 3.6. Substrates scope

In this section, the starting materials applied in the synthesis of triarylamines are classified according to the reactivity observed in the process.

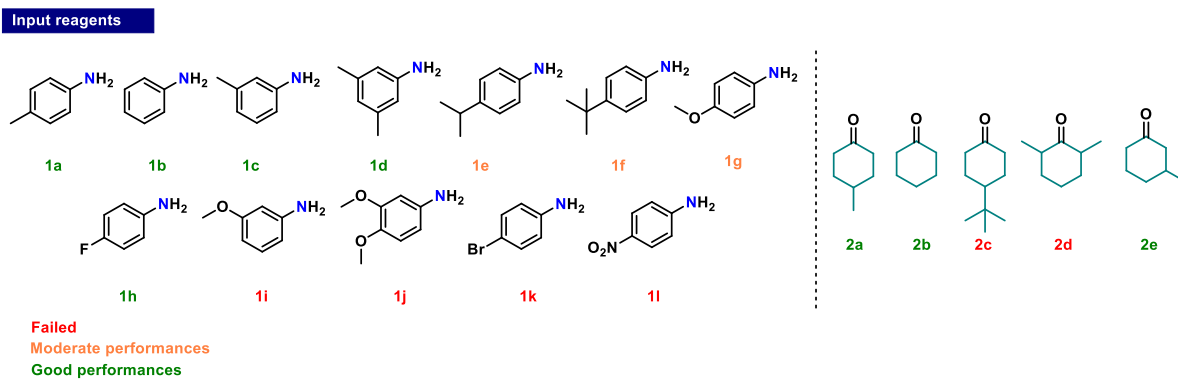

**Scheme S3.** Starting materials classified according to reactivity

### 3.7. Pd/C characterization

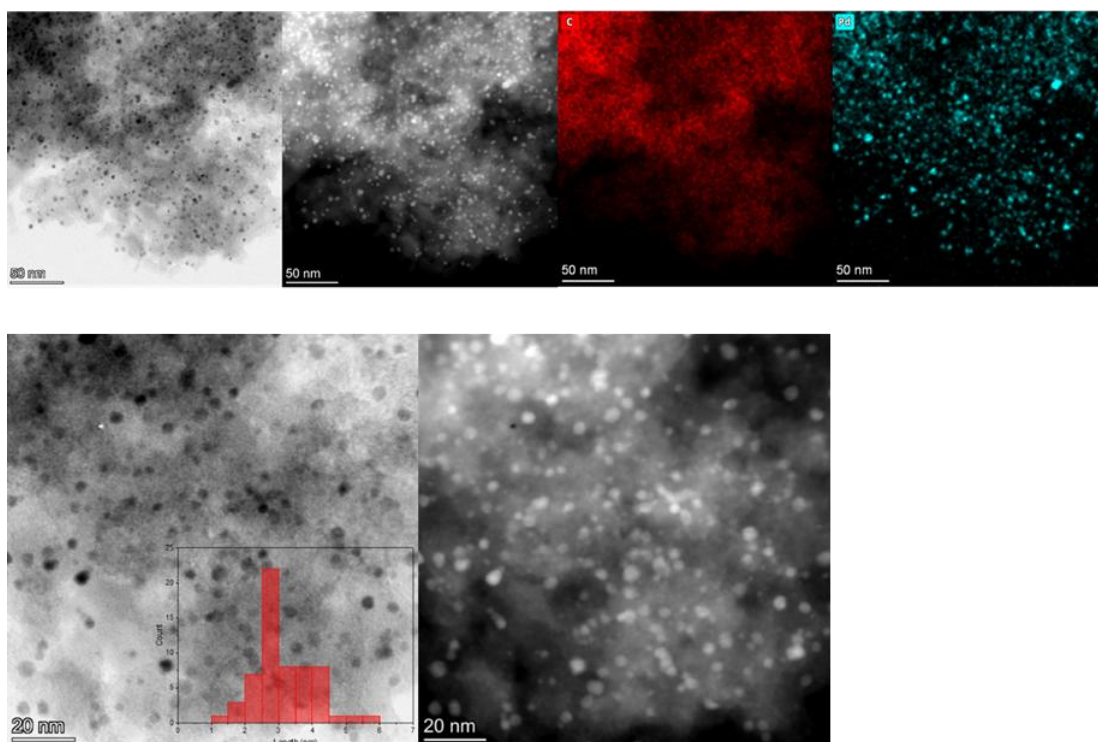

**Figure S2.** STEM analysis and EDS of fresh Pd/C

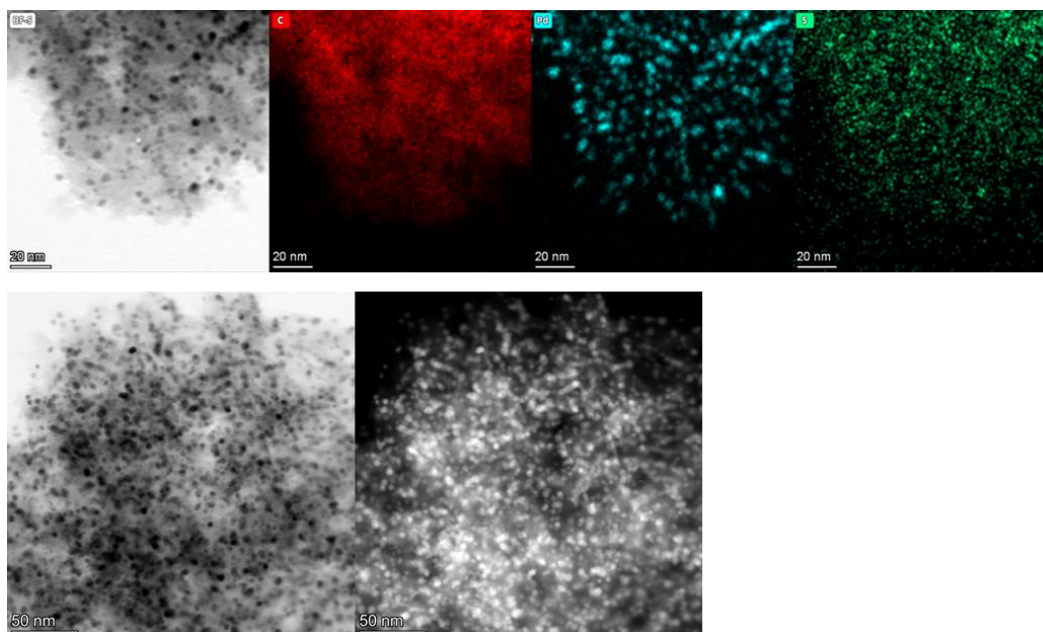

**Figure S3.** STEM analysis and EDS of Pd/C after 16 hours of reaction under air

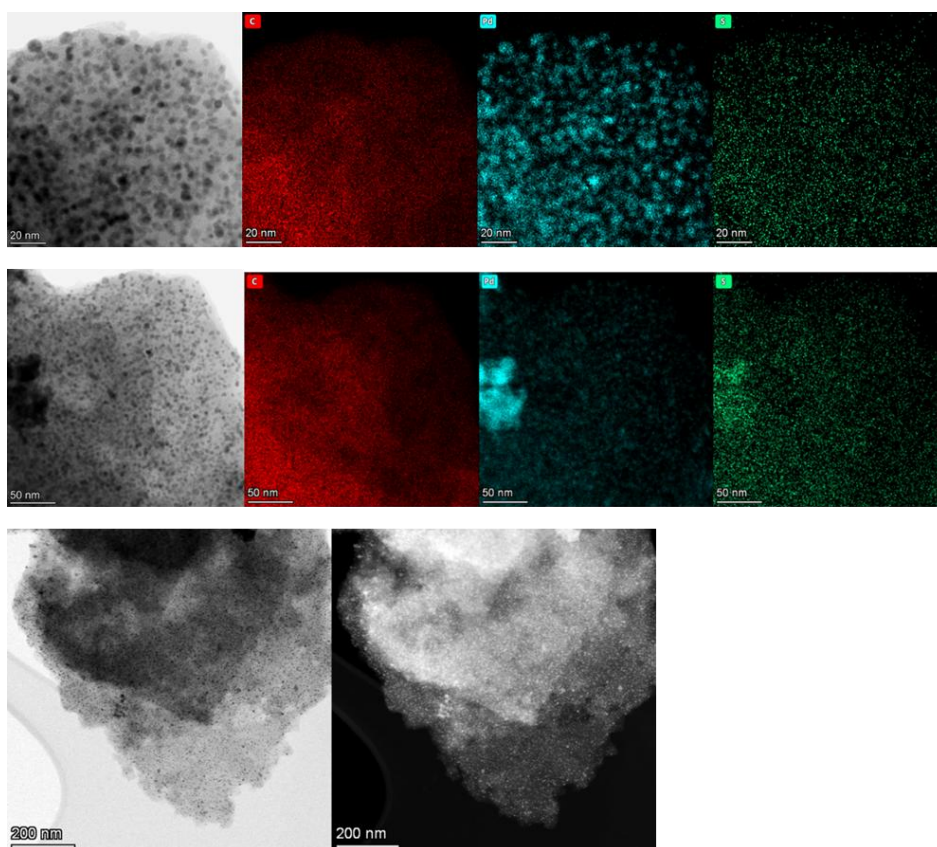

**Figure S4.** STEM analysis and EDS of Pd/C after optimized reaction conditions

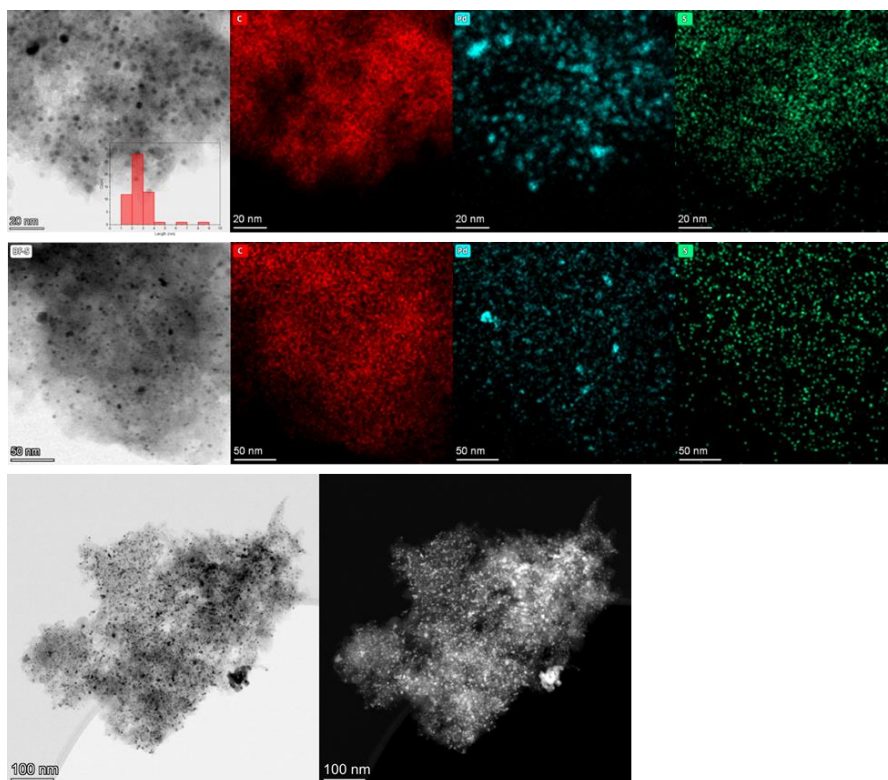

**Figure S5.** STEM analysis and EDS of Pd/C after 3 runs of reaction (Table S2)

### 3.8. Flow setup

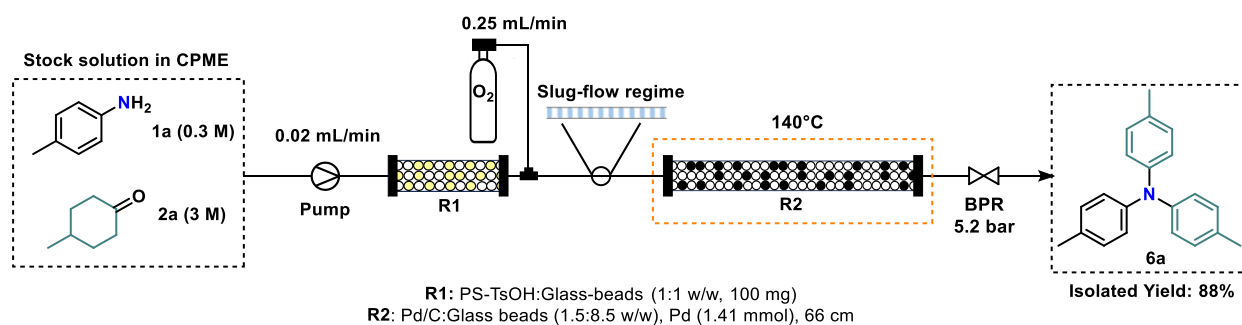

**Scheme S4.** Flow setup to synthesize **6a**

**Turnover number (TON) calculation:**

$$TON = \frac{\text{moles of product}}{\text{moles of Pd}} = \frac{26.1 \text{ mmol}}{1.41 \text{ mmol}} = 18.5$$

**Space-Time Yield calculation:**

$$STY = \frac{\text{mass of product}}{\text{reactor volume} \cdot \text{time}}$$

$$STY = \frac{7.7 \text{ g}}{12 \text{ mL} \cdot 83 \text{ h}} = 0.18 \text{ Kg L}^{-1} \text{ day}^{-1}$$

### 3.9. Green metrics evaluation

$$AE = \frac{MW_{\text{reactant}}}{MW_{\text{product}}} \qquad SF = \frac{\text{Actual Mass of Reagent}}{\text{Stoichiometric Mass of Reagents}}$$

$$MRP = \frac{RME \cdot SF}{AE \cdot \text{Yield}}$$

$$BI = 1 - EI = 1 - \frac{\sum_j f_j \Omega_j}{\sum_j \Omega_j} \qquad SHI = 1 - SHZI = 1 - \frac{\sum_j f_j \Omega_j}{\sum_j \Omega_j}$$

$$VMR = \frac{\sqrt{AE^2 + \text{Yield}^2 + \left(\frac{1}{SF}\right)^2 + MRP^2 + SHI^2 + BI^2}}{\sqrt{6}}$$

$$RME (\%) = 100 \cdot \frac{\text{Mass of product}}{\text{total input mass} - \text{mass of recovered material}} = 100 \cdot \frac{1}{(1 + E\text{Factor})}$$

Where  $f_i$  is the molar fraction

Abbreviations used in the table are reported herein:

- Atom economy (AE)
- Stoichiometric factor (SF)
- Material recovery parameter (MRP)
- Reaction mass efficiency (RME)
- Benign Index (BI)
- Safety hazard index (SHI)
- Vector magnitude ratio (VMR)

The safety/hazard analyses have been conducted in accordance with the methods, calculations and equations reported by J. Andraos in *Org. Process Res. Dev.* 17 (2013) 175–192.[1]

Abbreviations used in the table are reported herein:

- Molecular Weight (MW)
- Oxygen Balance (OB)
- Lethal Dose 50 (LD50)
- Lethal Concentration (LC 50)
- Flash Point (FLP)
- Lower Explosive Limit (LEL)
- Occupational Exposure Limits (OEL)
- Corrosiveness potential as a gas (CGP)
- Corrosiveness potential as a liquid/solid (CLP)
- Flammability potential (FP)

- Oxygen consumption potential (OBP)
- Explosive vapour potential (gases) (XVP)
- Occupational exposure limit potential (OELP)
- Risk phrase potential (RPP)

The benign index analyses, definitions, and equations for the multicompartiment method (MCM) have been used in accordance with the data and equations reported by J. Andraos in *Org. Process Res. Dev.* 16 (2012) 1482–1506.[2]

Abbreviations used in the tables are reported herein:

- Molecular Weight (MW)
- Smog Formation Potential (SFP)
- Global Warming Potential (GWP)
- Lethal Dose 50 (LD50)
- Lethal Concentration (LC 50)
- Z facto (Z)
- Inhalation Toxicity Potential (INHTP)
- Ingestion Toxicity Potential (INGTP)
- Biocentration Potential (BCP)
- Bioaccumulation Potential (BAP)
- Abiotic Resource Depletion Potential (ARDP)

Log Kow data are reported by J. Andraos in *ACS Sustainable Chem. Eng.* 2018, **6**, 3206–3214 and by J. Andraos and L. Vaccaro in *Green Chem.*, 2015, **17**, 913-925.[3-4] LD50, LC50, OEL, FLP and risk phrases references and sources: MSDS files for each compound, Registry of Toxic Effects of Chemical Substances (RTECS) and NIOSH POCKET GUIDE TO CHEMICAL HAZARDS, National Institute for Occupational Safety and Health, September 2007, Publication No. 2005-149 (<http://www.cdc.gov/niosh>). ODP, moles of H<sub>2</sub>, LBT, HGP, XP, ISP, Hacid, and ARDP were not assessed in this analysis. In addition, the metal catalyst and ligand were omitted from the calculation.

Workup and purification steps were explicitly included in the evaluation performed in a like-for-like manner. Heterogeneous catalytic systems were assumed to be fully recovered from the reaction mixture. For the chromatographic column, we used 25 g of Silica and 250 mL of eluent, recovering 247.5 mL by distillation. Additionally, solvents used in volumes greater than 10 mL were considered recoverable by distillation.

#### a) *J. Org. Chem.* 2000, **65**, 5327-5333

**General procedure:** A Schlenk tube was charged with Pd<sub>2</sub>(dba)<sub>3</sub> (4.6 mg, 0.005 mmol, 1 mol % Pd), P(*t*-Bu)<sub>2</sub>-*o*-biphenyl (6.0 mg, 0.02 mmol, 2 mol %), and sodium *tert*-butoxide (202 mg, 2.1 mmol). The flask was evacuated, backfilled with argon, and fitted with a rubber septum. Amine (1.0 mmol), aryl bromide (1.0 mmol), aryl chloride (1.05 mmol), and toluene (4 mL) were each added via syringe (amines or aryl halides which were solids at room temperature were added prior to the evacuation/backfill cycle). The flask was sealed with a Teflon screwcap, and the reaction mixture was heated to 80 °C with stirring until the intermediate diarylamine had been consumed, as judged by GC analysis. The reaction mixture was then cooled to room temperature, taken up in diethyl ether, washed with brine, dried with MgSO<sub>4</sub>, and concentrated in vacuo. The product was purified by flash chromatography on silica gel using a mixture of hexanes and ethyl acetate and/or toluene as the eluent.[5]

The calculation of the green metrics was performed following the procedure reported by the authors for the synthesis of *N*-(3,5-dimethylphenyl)-2,5-dimethyl-*N*-(*p*-tolyl)aniline.

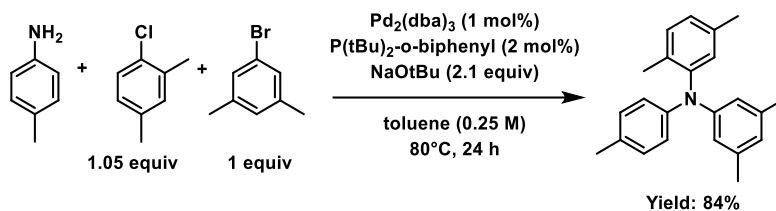

**Scheme S5.** Synthesis of *N*-(3,5-dimethylphenyl)-2,5-dimethyl-*N*-(*p*-tolyl)aniline. [5]

**Table S5.** ES and BI calculations for the synthesis of *N*-(3,5-dimethylphenyl)-2,5-dimethyl-*N*-(*p*-tolyl)aniline

| Substance                 | MW     | Mass (g) | Molar fraction | Carbon atoms | SFP  | GWP    | LD50 oral (mg/kg) | LC50 (g/m <sup>3</sup> 4 h) | H (atm m <sup>3</sup> /mol) | log Kow |
|---------------------------|--------|----------|----------------|--------------|------|--------|-------------------|-----------------------------|-----------------------------|---------|
| 4-methylaniline           | 107.15 | 0.107    | 0.02594        | 7            |      | 2.8745 | 620               | 0.64                        | 0.0000019                   | 0.91    |
| 2,5 dimethyl chlorbenzene | 154.64 | 0.1546   | 0.02725        | 8            | 0.07 | 2.2763 | 500               |                             | 1E-100                      | 3.7     |
| 3,5 dimethyl bromobenzene | 185.06 | 0.194    | 0.03991        | 8            |      | 1.9021 |                   |                             | 1E-100                      | -1E+100 |
| toluene                   | 92.4   | 3.468    | 0.83956        | 7            | 0.87 | 3.3333 | 636               | 25.87                       | 0.00663                     | 2.73    |
| NaotBu                    | 96.11  | 0.202    | 0.04890        | 4            |      | 1.8313 | 0.0035            |                             | 1E-100                      | -1E+100 |

| Substance                 | Koc  | Z(air)  | Z(water)    | Z(soil)  | Z(sediment) | fugacity (atm) | C(water) mol/m <sup>3</sup> | C(air) mol/m <sup>3</sup> | INHTP  | INGTP    | BCP      | Ω       | EI contribution |
|---------------------------|------|---------|-------------|----------|-------------|----------------|-----------------------------|---------------------------|--------|----------|----------|---------|-----------------|
| 4-methylaniline           | 3    | 40.6009 | 526315.7895 | 84192.13 | 168384.3    | 8.47675E-14    | 4.46E-08                    | 3.44E-12                  | 2.4489 | 112.4467 | 0.041381 | 117.811 | 3.05602483      |
| 2,5 dimethyl chlorbenzene | 2055 | 40.6009 | 1E+100      | 9.9E+101 | 2E+102      | 7.1338E-109    | 7.13E-09                    | 2.9E-107                  | 0      | 22.29521 | 5.460093 | 30.1016 | 0.82025784      |
| 3,5 dimethyl bromobenzene | 0    | 40.6009 | 1E+100      | 1.97E+98 | 3.94E+98    | 2.9206E-108    | 2.92E-08                    | 1.2E-106                  | 0      | 0        | 0        | 1.90209 | 0.07591439      |
| toluene                   | 220  | 40.6009 | 150.8295626 | 1594.085 | 3188.171    | 2.63647E-12    | 3.98E-10                    | 1.07E-10                  | 1.8843 | 0.977047 | 1        | 8.06466 | 6.77084277      |
| NaotBu                    | 0    | 40.6009 | 1E+100      | 0        | 0           | 5.2026E-108    | 5.2E-08                     | 2.1E-106                  | 0      | 23228367 | 0        | 2322837 | 1135919.31      |

|           |          |             |           |
|-----------|----------|-------------|-----------|
| SUBTOTALS | 23228582 | 1135930.098 | <b>ES</b> |
|           |          | 0.048902257 | <b>EI</b> |
|           |          | 0.951097743 | <b>BI</b> |

**Table S6.** SHI calculations for the synthesis of *N*-(3,5-dimethylphenyl)-2,5-dimethyl-*N*-(*p*-tolyl)aniline

| Substance                 | MW     | mass (g) | Molar fraction | OB          | LD50 dermal (mg/kg) | LC50 (g/m <sup>3</sup> 4 h) | FLP(deg C) | LEL | IS (N m) | OEL (mmol/m <sup>3</sup> ) | Q (R-phrases) |
|---------------------------|--------|----------|----------------|-------------|---------------------|-----------------------------|------------|-----|----------|----------------------------|---------------|
| 4-methylaniline           | 107.15 | 0.052    | 0.012773       | -2.7624825  | 890                 | 0.64                        | 87         | 0   | 1.3      | 0.084                      | 56250000      |
| 2,5 dimethyl chlorbenzene | 154.64 | 0.15464  | 0.037986       | -2.27625453 |                     |                             | 67         | 0   |          |                            | 3375          |
| 3,5 dimethyl bromobenzene | 185.06 | 0.1943   | 0.047729       | -1.90208581 |                     |                             | 87         | 0   |          |                            | 3375          |
| toluene                   | 92.4   | 3.468    | 0.851892       | -3.11688312 | 5000                | 25.7                        | 4.4        | 0   | 1.2      | 2.08                       | 937500        |
| NaotBu                    | 96.105 | 0.202    | 0.04962        | -1.9145726  |                     |                             | 14         | 0   | 2.3      |                            | 20            |

| Substance                 | CGP         | CLP         | FP          | OBP         | XVP         | OELP        | RPP         | Ω           | SHZI contribution |
|---------------------------|-------------|-------------|-------------|-------------|-------------|-------------|-------------|-------------|-------------------|
| 4-methylaniline           | 0.8125      | 2.528089888 | 0.633333333 | 0.690620625 | 1.307692308 | 48.52380952 | 3.12868113  | 57.62472681 | 0.736067295       |
| 2,5 dimethyl chlorbenzene | 0           | 0           | 0.670588235 | 0.569063632 | 0           | 0           | 1.424344396 | 2.663996263 | 0.101195395       |
| 3,5 dimethyl bromobenzene | 0           | 0           | 0.633333333 | 0.475521453 | 0           | 0           | 1.424344396 | 2.533199182 | 0.120905884       |
| toluene                   | 0.020233463 | 0.45        | 0.821917808 | 0.779220779 | 1.416666667 | 1.959615385 | 2.410851413 | 7.858505514 | 6.694595628       |
| NaotBu                    | 0           | 0           | 0.794425087 | 0.478643151 | 0.739130435 | 0           | 0.525218535 | 2.537417207 | 0.125906615       |

|           |             |             |             |
|-----------|-------------|-------------|-------------|
| SUBTOTALS | 73.21784497 | 7.778670817 | <b>SHZS</b> |
|           |             | 0.106240095 | <b>SHZI</b> |
|           |             | 0.893759905 | <b>SHI</b>  |

The green metrics were calculated using the authors' procedure for the synthesis of the selected product **6a**.

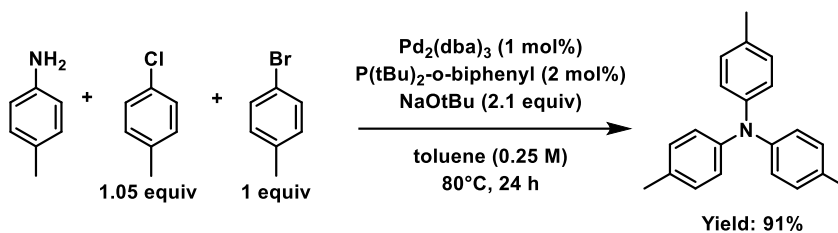

**Scheme S6.** Synthesis of **6a**

**Table S7.** E-Factor calculation

| Reactant                           |                |
|------------------------------------|----------------|
| 4-methylaniline                    | 0.10716        |
| 4Mechlorobenzene                   | 0.18506        |
| 4MeBromobenzene                    | 0.14764        |
| NaOtBu                             | 0.202          |
| Solvent                            |                |
| toluene                            | 3.48           |
| Catalyst                           |                |
| Pd <sub>2</sub> (dba) <sub>3</sub> | 0.0046         |
| P(t-Bu) <sub>2</sub> -o-biphenyl   | 0.00600        |
| Workup                             |                |
| water                              | 10             |
| Et <sub>2</sub> O                  | 11             |
| Purification                       |                |
| Silica                             | 25             |
| eluent                             | 250            |
| Recovery of Materials              |                |
| eluent and Et <sub>2</sub> O       | 258            |
| Product                            |                |
| p-toluiditriphenylamine            | 0.26           |
| <b>E-Factor</b>                    | <b>&gt;100</b> |

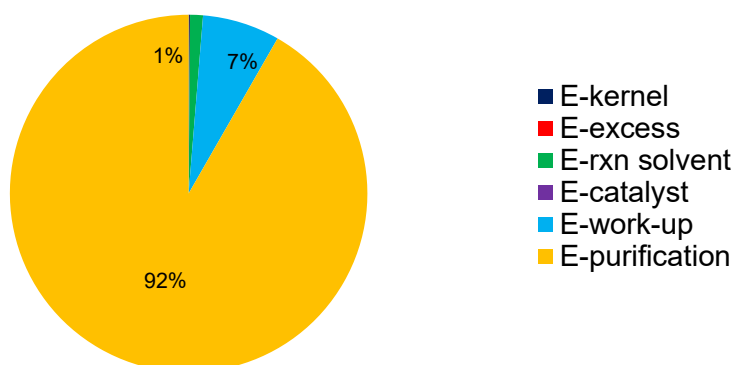

**Figure S6.** E-Factor distribution

**Table S8.** ES and BI calculations for the synthesis of **6a**

| Substance             | MW     | Mass (g) | Molar fraction | Carbon atoms | SFP  | GWP      | LD50 oral (mg/kg) | LC50 (g/m <sup>3</sup> 4 h) | H (atm m <sup>3</sup> /mol) | log Kow |
|-----------------------|--------|----------|----------------|--------------|------|----------|-------------------|-----------------------------|-----------------------------|---------|
| 4-methylaniline       | 107.15 | 0.0931   | 0.023015       | 7            |      | 2.874475 | 620               | 0.64                        | 0.0000019                   | 0.91    |
| 4-methylchlorobenzene | 126.58 | 0.11256  | 0.027826       | 7            | 0.07 | 2.433244 | 2273              | 21.5                        | 0.00358                     | 2.84    |
| 4-methylbromobenzene  | 171.04 | 0.164861 | 0.040755       | 7            |      | 1.800748 | 1540              | 6.8                         | 0.00233                     | 3.4     |
| toluene               | 92.4   | 3.468    | 0.857329       | 7            | 0.87 | 3.333333 | 636               | 25.87                       | 0.00663                     | 2.73    |
| NaotBu                | 96.105 | 0.202    | 0.049937       | 4            |      | 1.83133  | 0.0035            |                             | 1E-100                      | 1E+100  |

| Substance             | Koc  | Z(air) | Z(water)   | Z(soil)  | Z(sediment) | fugacity (atm) | C(water) mol/m <sup>3</sup> | C(air) mol/m <sup>3</sup> | INHTP    | INGTP       | BCP         | Ω         | EI contribution |
|-----------------------|------|--------|------------|----------|-------------|----------------|-----------------------------|---------------------------|----------|-------------|-------------|-----------|-----------------|
| 4-methylaniline       | 3    | 40.601 | 526315.790 | 8419.213 | 168384.3    | 8.47675E-14    | 4.46E-08                    | 3.44E-12                  | 2.448886 | 112.4466551 | 0.041380906 | 117.8114  | 2.711474493     |
| 4-methylchlorobenzene | 284  | 40.601 | 279.330    | 3803.138 | 7606.28     | 1.903E-12      | 5.32E-10                    | 7.73E-11                  | 1.6367   | 0.3654839   | 1.21227     | 5.717699  | 0.1591014       |
| 4-methylbromobenzene  | 1030 | 40.601 | 429.185    | 2121.628 | 42432.6     | 1.347E-12      | 5.78E-10                    | 5.47E-11                  | 3.661942 | 0.5865256   | 3.22998     | 9.2791968 | 0.3781774       |
| toluene               | 220  | 40.601 | 150.830    | 1594.085 | 3188.17     | 2.636E-12      | 3.98E-10                    | 1.07E-10                  | 1.884283 | 0.9770468   | 1           | 8.0646634 | 6.9140716       |
| NaotBu                | 0    | 40.601 | 0          | 0        | 0           | 2.563E-12      | 0                           | 1.04E-10                  | 0        | 0           | 0           | 1.8313303 | 0.0914506       |

|           |           |             |    |
|-----------|-----------|-------------|----|
| SUBTOTALS | 198.02109 | 10.31718013 | ES |
|           |           | 0.052101419 | EI |
|           |           | 0.947898581 | BI |

**Table S9.** SHI calculations for the synthesis of **6a**

| Substance       | MW     | mass (g)  | Molar fraction | OB          | LD50 dermal (mg/kg) | LC50 (g/m <sup>3</sup> 4 h) | FLP(deg C) |    |     |        | LEL    | IS (N m) | OEL (mmol/m <sup>3</sup> ) | Q (R-phrases) |
|-----------------|--------|-----------|----------------|-------------|---------------------|-----------------------------|------------|----|-----|--------|--------|----------|----------------------------|---------------|
| 4-methylaniline | 107.15 | 0.04655   | 0.023042       | -2.31451237 | 890                 | 0.64                        | 87         | 0  | 1.3 | 1E+100 | 890    | 0.64     | 0.084                      | 56250000      |
| 4-chlorotoluene | 126.58 | 0.05628   | 0.027858       | -1.83283299 | 5000                | 5.92                        | 49         | 0  |     | 1E+100 | 5000   | 5.92     |                            | 50625         |
| 4-bromotoluene  | 171.04 | 0.0824305 | 0.040802       | -1.35640786 | 2000                | 6.8                         |            | 0  |     | 1E+100 | 2000   | 6.8      |                            | 3375          |
| toluene         | 92.4   | 1.734     | 0.858305       | -3.11688312 | 5000                | 25.7                        | 4.4        | 0  | 1.2 | 1E+100 | 5000   | 25.7     | 2.08                       | 937500        |
| NaotBu          | 96.105 | 0.101     | 0.049994       | -1.9145726  |                     |                             |            | 14 | 0   | 2.3    | 1E+100 |          |                            | 20            |

| Substance       | CGP         | CLP         | FP          | OBP         | XVP         | OELP        | RPP         | Ω           | SHZI contribution |
|-----------------|-------------|-------------|-------------|-------------|-------------|-------------|-------------|-------------|-------------------|
| 4-methylaniline | 0.8125      | 2.528089888 | 0.633333333 | 0.690620625 | 1.307692308 | 48.52380952 | 3.12868113  | 57.62472681 | 1.327764926       |
| 4-chlorotoluene | 0.087837838 | 0.45        | 0.708074534 | 0.553009954 | 0           | 0           | 1.899125861 | 3.698048187 | 0.103019463       |
| 4-bromotoluene  | 0.076470588 | 1.125       | 0           | 0.409260992 | 0           | 0           | 1.424344396 | 3.035075976 | 0.123836916       |
| toluene         | 0.020233463 | 0.45        | 0.821917808 | 0.779220779 | 1.416666667 | 1.959615385 | 2.410851413 | 7.858505514 | 6.744995787       |
| NaotBu          | 0           | 0           | 0.794425087 | 0.478643151 | 0.739130435 | 0           | 0.525218535 | 2.537417207 | 0.126854501       |

|           |             |             |      |
|-----------|-------------|-------------|------|
| SUBTOTALS | 74.75377369 | 8.426471594 | SHZS |
|           |             | 0.112723026 | SHZI |
|           |             | 0.887276974 | SHI  |

**b) Nat. Commun. 2021, 12, 248**

**General procedure:** In an argon-filled glove-box, a 25 mL oven-dried seal-tube equipped with a magnetic stir bar was charged with lithium powder (6.0 equiv., 3.0 mmol, 0.0210 g). The tube was removed from the glovebox, degassed and refilled with N<sub>2</sub>. The tube was stirred under nitrogen atmosphere at 150 °C for 4 h. Then aryl bromide (1.0 equiv., 0.50 mmol), tris(dibenzylideneacetone)dipalladium (0.025 equiv., 0.0125 mmol, 0.0114 g), 2-dicyclohexylphosphino-2',6'-diisopropoxybiphenyl (0.10 equiv., 0.05 mmol, 0.0233 g), sodium tert-butoxide (2.0 equiv., 1.0 mmol, 0.0961 g), tetrabutylammonium bromide (1.0 equiv., 0.50 mmol, 0.1610 g) and dioxane (2.0 mL) were added into the above tube, and the reaction mixture was stirred under nitrogen atmosphere at 150 °C for 24 h. The reaction mixture was allowed to cool to room temperature and quenched by water. A saturated solution of brine and ethyl acetate were added. The aqueous phase was extracted three

times with ethyl acetate. The combined organic layer was washed with brine and filtered. The solvent was removed under reduced pressure. Finally, the residue was purified by flash chromatography on silica gel.[6]

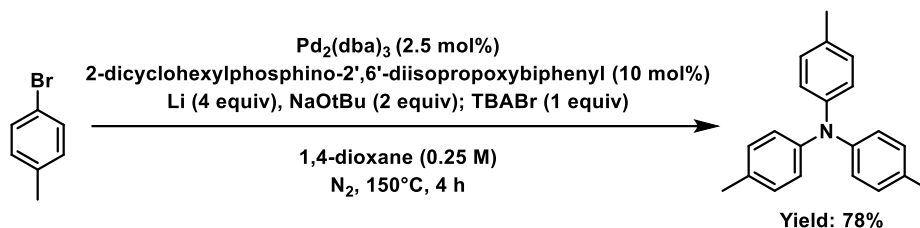

**Scheme S7.** Synthesis of **6a**. [6]

**Table S10.** E-Factor calculation

| Reactant                                           |                |
|----------------------------------------------------|----------------|
| 4-Methylbromobenzene                               | 0.07850186     |
| N <sub>2</sub>                                     | 0.00457        |
| Li                                                 | 0.021          |
| tetrabutylammonium bromide                         | 0.161          |
| NaOtBu                                             | 0.0961         |
| Solvent                                            |                |
| 1,4-dioxane                                        | 2.06           |
| Catalyst                                           |                |
| tris(dibenzylideneacetone)dipalladium              | 0.0114         |
| 2-dicyclohexylphosphino-2',6'-diisopropoxybiphenyl | 0.0233         |
| Workup                                             |                |
| water                                              | 10             |
| eluent and Et <sub>2</sub> O                       | 11             |
| Purification                                       |                |
| Silica                                             | 25             |
| eluent                                             | 250            |
| Recovery of Materials                              |                |
| eluent                                             | 258            |
| Product                                            |                |
| p-toluiditriphenylamine                            | 0.0342         |
| <b>E-Factor</b>                                    | <b>&gt;100</b> |

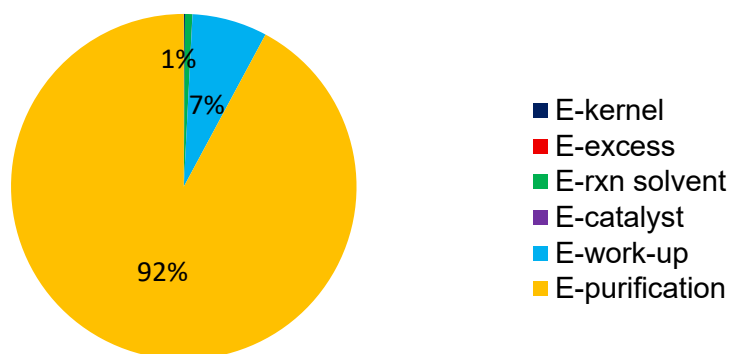

**Figure S7.** E-Factor distribution

**Table S11.** ES and BI calculations for **6a**

| Substance                 | MW     | Mass (g) | Molar fraction | Carbon atoms | SFP  | GWP      | LD50 oral (mg/kg) | LC50 (µg/m <sup>3</sup> 4 h) | H (atm m <sup>3</sup> /mol) | log Kow |
|---------------------------|--------|----------|----------------|--------------|------|----------|-------------------|------------------------------|-----------------------------|---------|
| 4methylbromobenzene       | 171.04 | 0.164861 | 0.040755       | 7            |      | 1.800748 | 1540              | 6.8                          | 0.00233                     | 3.4     |
| Li                        | 6.941  | 0.021    | 0.00839        | 0            |      | 0        |                   |                              | 1E-100                      | -1E+100 |
| 1,4-diossano              | 88.11  | 2.06     | 0.823025       | 4            | 0.87 | 1.997503 | 4200              | 23                           | 0.0000048                   | -1E+100 |
| NaotBu                    | 96.105 | 0.161    | 0.064324       | 4            |      | 1.83133  | 0.0035            |                              | 1E-100                      | -1E+100 |
| tetrabutylammoniumbromuro | 322.37 | 0.0961   | 0.038395       | 16           |      | 2.183826 | 300               |                              | 1E-100                      | 0.84    |

| Substance                 | Koc  | Z(air)   | Z(water)    | Z(soil)  | Z(sediment) | fugacity (atm) | C(water) mol/m <sup>3</sup> | C(air) mol/m <sup>3</sup> | INHPT    | INGTP       | BCP         | Ω         | EI contribution |
|---------------------------|------|----------|-------------|----------|-------------|----------------|-----------------------------|---------------------------|----------|-------------|-------------|-----------|-----------------|
| 4methylbromobenzene       | 1030 | 40.60089 | 429.1845494 | 21216.28 | 42432.55    | 1.34679E-12    | 5.78E-10                    | 5.47E-11                  | 3.661942 | 0.586525621 | 3.229981241 | 9.2791968 | 0.378177367     |
| Li                        | 0    | 40.60089 | 0           | 0        | 0           | 3.54848E-11    | 0                           | 1.44E-09                  | 0        | 0           | 0           | 0         | 0               |
| 1,4-diossano              | 0    | 40.60089 | 208333.3333 | 0        | 0           | 2.48202E-13    | 5.17E-08                    | 1.01E-11                  | 0.199524 | 19.23873822 | 0           | 22.305766 | 18.35821116     |
| NaotBu                    | 0    | 40.60089 | 0           | 0        | 0           | 2.56282E-12    | 0                           | 1.04E-10                  | 0        | 0           | 0           | 1.8313303 | 0.117798176     |
| tetrabutylammoniumbromuro | 3    | 40.60089 | 0           | 0        | 0           | 7.64029E-13    | 0                           | 3.1E-11                   | 0        | 0           | 0.03661023  | 2.2204361 | 0.085252606     |

|           |           |             |    |
|-----------|-----------|-------------|----|
| SUBTOTALS | 35.636729 | 18.93943931 | ES |
|           |           | 0.531458411 | EI |
|           |           | 0.468541589 | BI |

Table S12. SHI calculations for 6a

| Substance         | MW     | mass (g) | Molar fraction | OB          | LD50 dermal (mg/kg) | LC50 (µg/m <sup>3</sup> 4 h) | FLP(deg C) | LEL | IS (N m) | OEL (mmol/m <sup>3</sup> ) | Q (R-phrases) |
|-------------------|--------|----------|----------------|-------------|---------------------|------------------------------|------------|-----|----------|----------------------------|---------------|
| 4-bromobtoluene   | 171.04 | 0.0785   | 0.032484       | -1.35640786 | 2000                | 6.8                          |            |     | 1E+100   |                            | 3375          |
| Li                | 6.941  | 0.021    | 0.00869        | 0           |                     |                              |            |     | 1E+100   |                            | 20            |
| 1,4-diossano      | 88.11  | 2.06     | 0.852437       | -1.81591193 | 7378                | 23                           | 11         | 2   | 1E+100   | 0.415                      | 112500        |
| tetrabutylammonio | 322.37 | 0.0961   | 0.039767       | -0.62040512 |                     |                              | 113        | 0   | 1E+100   |                            | 20            |
| NaotBu            | 96.105 | 0.161    | 0.066623       | -1.9145726  |                     |                              | 14         | 2.3 | 1E+100   |                            | 20            |

| Substance         | CGP         | CLP         | FP          | OBP         | XVP         | OELP       | RPP         | Ω           | SHZI contribution |
|-------------------|-------------|-------------|-------------|-------------|-------------|------------|-------------|-------------|-------------------|
| 4-bromobtoluene   | 0.076470588 | 1.125       | 0           | 0.409260992 | 0           | 0          | 1.424344396 | 3.035075976 | 0.09859036        |
| Li                | 0           | 0           | 0           | 0           | 0           | 0          | 0.525218535 | 0.525218535 | 0.004564094       |
| 1,4-diossano      | 0.022608696 | 0.304960694 | 0.802816901 | 0.453977982 | 0.85        | 9.82168675 | 2.03912203  | 14.29517305 | 12.18573884       |
| tetrabutylammonio | 0           | 0           | 0.590673575 | 0.155101281 | 0           | 0          | 0.525218535 | 1.270993391 | 0.050543104       |
| NaotBu            | 0           | 0           | 0.794425087 | 0.478643151 | 0.739130435 | 0          | 0.525218535 | 2.537417207 | 0.169049148       |

|           |             |             |      |
|-----------|-------------|-------------|------|
| SUBTOTALS | 21.66387816 | 12.50848555 | SHZS |
|           |             | 0.577389028 | SHZI |
|           |             | 0.422610972 | SHI  |

### c) J. Org. Chem. 2024, 89, 17021-17030

**General procedure:** A 25 mL Schlenk tube with a PTFE-coated magnetic stir bar was connected to a high vacuum ( $50 \times 10^{-3}$  mbar) through a double-manifold Schlenk line and dried by using a hot air gun. After cooling down, it was backfilled with argon (3 cycles). Under positive pressure of argon, Pd<sub>2</sub>dba<sub>3</sub> (11.4 mg, 0.0125 mmol, 2.5 mol %) and Xantphos (14.5 mg, 0.025 mmol, 5 mol %) or XPhos (11.9 mg, 0.025 mmol 5 mol %) were added, followed by dry toluene (1 mL, 0.5 M). This was gently stirred for 10 min until the deep wine-red color completely changed to dark brown. After that, aryl halide (0.5 mmol, 1 equiv) was added, followed by a quick addition of solid NaNH<sub>2</sub> (104 mg, 2.5 mmol, 5 equiv). The Schlenk tube was closed with a glass stopper and placed in the preheated metal block at 110 °C with constant stirring (1000 rpm) for 12–24 h. The reaction progress was monitored using TLC with aliquots under positive argon pressure. After completion of the reaction, it was exposed to air and diluted with 2 mL of ethyl acetate. The reaction mixture

was dry-loaded using silica (100–200 or 200–400 mesh) and purified using silica gel column chromatography.[7]

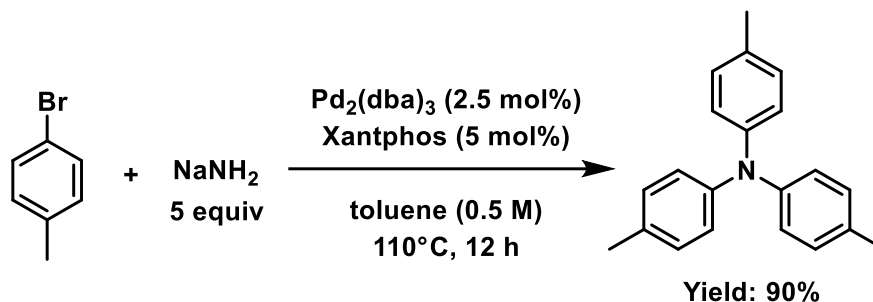

**Scheme S8.** Synthesis of 6a. [7]

**Table S13.** E-Factor calculation

| Reactant                  |                |
|---------------------------|----------------|
| 4-Methylbromobenzene      | 0.08552        |
| $\text{NaNH}_2$           | 0.0975         |
| Solvent                   |                |
| toluene                   | 0.867          |
| Catalyst                  |                |
| $\text{Pd}_2\text{dba}_3$ | 0.0110         |
| Xantphos                  | 0.014          |
| Workup                    |                |
| EtOAc                     | 0.9            |
| Purification              |                |
| Silica                    | 25             |
| eluent                    | 250            |
| Recovery of Materials     |                |
| eluent                    | 247.5          |
| Product                   |                |
| p-toluiditriphenylamine   | 0.0548         |
| <b>E-Factor</b>           | <b>&gt;100</b> |

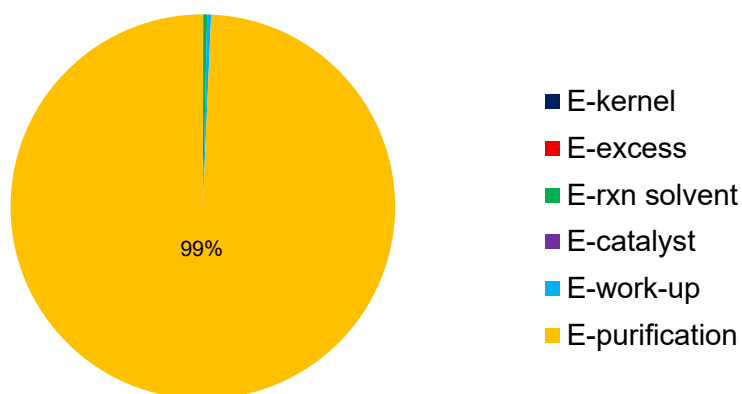

**Figure S8.** E-Factor distribution

**Table S14.** EI and BI calculation for the synthesis of **6a**

| Substance           | MW     | Mass (g) | Molar fraction | Carbon atoms | SFP  | GWP      | LD50 oral (mg/kg) | LC50 (g/m <sup>3</sup> 4 h) | H (atm m <sup>3</sup> /mol) | log Kow |
|---------------------|--------|----------|----------------|--------------|------|----------|-------------------|-----------------------------|-----------------------------|---------|
| 4methylbromobenzene | 171.04 | 0.0785   | 0.008849       | 7            |      | 1.800748 | 1540              | 6.8                         | 0.00233                     | 3.4     |
| toluene             | 92.4   | 8.67     | 0.977342       | 7            | 0.87 | 3.333333 | 636               | 25.87                       | 0.00663                     | 2.73    |
| NaNH <sub>2</sub>   | 96.105 | 0.0975   | 0.010991       | 0            |      | 0        | 2200              | 42                          | 1.00E-100                   | -1E+100 |

| Substance           | Koc  | Z(air)   | Z(water)    | Z(soil)  | Z(sediment) | fugacity (atm) | C(water) mol/m <sup>3</sup> | C(air) mol/m <sup>3</sup> | INHTP    | INGTP       | BCP         | ARDP | Ω         | EI contribution |
|---------------------|------|----------|-------------|----------|-------------|----------------|-----------------------------|---------------------------|----------|-------------|-------------|------|-----------|-----------------|
| 4methylbromobenzene | 1030 | 40.60089 | 429.1845494 | 21216.28 | 42432.55    | 1.34679E-12    | 5.78E-10                    | 5.47E-11                  | 3.661942 | 0.586525621 | 3.229981241 | 0    | 9.2791968 | 0.082112157     |
| toluene             | 220  | 40.60089 | 150.8295626 | 1594.085 | 3188.171    | 2.63647E-12    | 3.98E-10                    | 1.07E-10                  | 1.884283 | 0.977046665 | 1           | 0    | 8.0646634 | 7.881933413     |
| NaNH <sub>2</sub>   | 0    | 40.60089 | 1E+100      | 0        | 0           | 5.2026E-108    | 5.2E-08                     | 2.1E-106                  | 2.29E-96 | 36.95422059 | 0           | 0    | 36.954221 | 0.406159002     |

|           |           |             |           |
|-----------|-----------|-------------|-----------|
| SUBTOTALS | 66.465928 | 8.388578856 | <b>ES</b> |
|           |           | 0.126208707 | <b>EI</b> |
|           |           | 0.873791293 | <b>BI</b> |

**Table S15.** SHI calculations for the synthesis of **6a**

| Substance         | MW     | mass (g) | Molar fraction | OB          | LD50 dermal (mg/kg) | LC50 (g/m <sup>3</sup> 4 h) | FLP(deg C) | LEL | IS (N m) | OEL (mmol/m <sup>3</sup> ) | Q (R-phrases) |
|-------------------|--------|----------|----------------|-------------|---------------------|-----------------------------|------------|-----|----------|----------------------------|---------------|
| 4-bromobenzene    | 171.04 | 0.0785   | 0.00886        | -1.35640786 | 2000                | 6.8                         |            |     | 1E+100   |                            | 3375          |
| toluene           | 92.4   | 8.67     | 0.978555       | -3.11688312 | 5000                | 25.7                        | 4.4        | 1.2 | 1E+100   | 2.08                       | 937500        |
| NaNH <sub>2</sub> | 96.105 | 0.0975   | 0.011005       | -0.99890744 |                     |                             |            |     | 1E+100   |                            | 30            |
| XantPhos          | 578.62 | 0.014    | 0.00158        | -2.70989596 |                     |                             |            |     | 1E+100   |                            | 3375          |

| Substance         | CGP         | CLP   | FP          | OBP         | XVP        | OELP    | RPP         | Ω           | SHZI contribution |
|-------------------|-------------|-------|-------------|-------------|------------|---------|-------------|-------------|-------------------|
| 4-bromobenzene    | 0.076470588 | 1.125 | 0           | 0.339101964 | 0          | 0       | 0           | 1.424344396 | 2.964916949       |
| toluene           | 0.020233463 | 0.45  | 0.821917808 | 0.779220779 | 1.41666667 | 0.04076 | 1.959615385 | 2.410851413 | 7.858505514       |
| NaNH <sub>2</sub> | 0           | 0     | 0           | 0.249726861 | 0          | 0       | 0           | 0.596305591 | 0.846032453       |
| XantPhos          | 0           | 0     | 0           | 0.67747399  | 0          | 0       | 0           | 1.424344396 | 2.101818386       |

|           |            |             |             |
|-----------|------------|-------------|-------------|
| SUBTOTALS | 13.7712733 | 7.728882891 | <b>SHZS</b> |
|           |            | 0.561232264 | <b>SHZI</b> |
|           |            | 0.438767736 | <b>SHI</b>  |

**d) Catal. Sci. Technol. 2017, 17, 2170-2182**

**General procedure:** 5 mmol of nitrobenzene, 6 mmol of cyclohexanone, 100 mg of the catalyst and 2 mL of toluene were added to a 15 mL pressure tube equipped with a magnetic stirrer and reacted at 80 °C for 36 h under Ar. Then the reaction mixture was cooled to room temperature. The crude reaction mixture was concentrated in vacuo and purified by column chromatography to give biphenylamine in 82% isolated yield.[8]

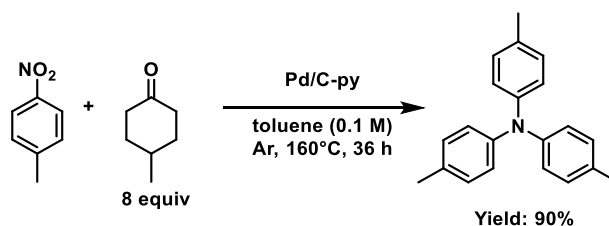**Scheme S9.** Synthesis of **6a**. [8]**Table S16.** E-Factor calculation

| Reactant                |                |
|-------------------------|----------------|
| 4-methylanitrobenzene   | 0.061555       |
| 4-methylcyclohexanone   | 0.39           |
| Solvent                 |                |
| toluene                 | 4.3            |
| Catalyst                |                |
| Pd/C-py                 | 0.03           |
| Workup                  |                |
|                         |                |
| Purification            |                |
| Silica                  | 25             |
| eluent                  | 250            |
| Recovery of Materials   |                |
| Pd/C-py                 | 0.03           |
| eluent                  | 247.5          |
| Product                 |                |
| p-toluiditriphenylamine | 0.116          |
|                         |                |
| <b>E-Factor</b>         | <b>&gt;100</b> |

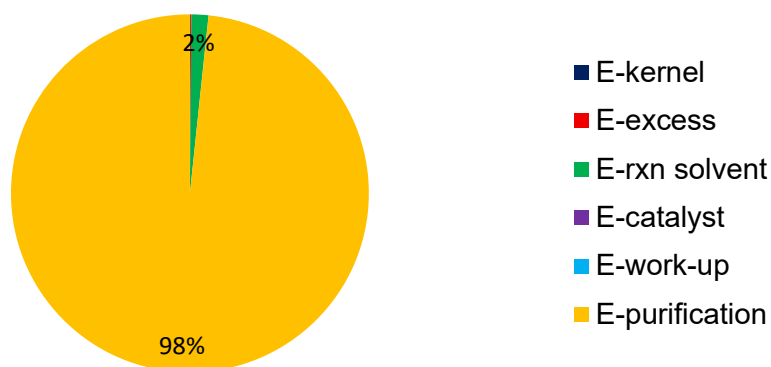

Figure S9. E-Factor distribution

Table S17. EI and BI calculation for the synthesis of 6a

| Substance             | MW     | Mass (g) | Molar fraction | Carbon atoms | ODP | SFP  | GWP      | LD50 oral (mg/kg) | LC50 (g/m <sup>3</sup> 4 h) | H (atm m <sup>3</sup> /mol) | log Kow |
|-----------------------|--------|----------|----------------|--------------|-----|------|----------|-------------------|-----------------------------|-----------------------------|---------|
| 4-methylnitrobenzene  | 137.14 | 0.061555 | 0.012873       | 7            |     | 0.02 | 2.24588  |                   |                             | 1E-100                      | -1E+100 |
| 4-methylcyclohexanone | 112.17 | 0.39     | 0.081563       | 7            |     |      | 2.745832 | 1800              |                             | 1E-100                      | 1.38    |
| Pd/C                  |        | 0.03     | 0.006274       | 0            |     |      | 0        |                   |                             | 1.00E-100                   | -1E+100 |
| Toluene               | 92.14  | 4.3      | 0.899289       | 7            |     |      | 3.342739 | 636               | 25.87                       | 0.00663                     | 2.73    |

| Substance             | K <sub>oc</sub> | Z(air)   | Z(water)    | Z(soil)  | Z(sediment) | fugacity (atm) | C(water) mol/m <sup>3</sup> | C(air) mol/m <sup>3</sup> | INHTP    | INGTP       | BCP        | Ω         | EI contribution |
|-----------------------|-----------------|----------|-------------|----------|-------------|----------------|-----------------------------|---------------------------|----------|-------------|------------|-----------|-----------------|
| 4-methylnitrobenzene  | 0               | 40.60089 | 1E+100      | 0        | 0           | 3.6459E-108    | 3.646E-08                   | 1.5E-106                  | 0        | 0           | 0          | 2.2658801 | 0.029169643     |
| 4-methylcyclohexanone | 0               | 40.60089 | 1E+100      | 8.2E+96  | 1.64E+97    | 4.4574E-108    | 4.46E-08                    | 1.8E-106                  | 0        | 38.69609107 | 0.09418896 | 41.536112 | 3.387827554     |
| Pd/C                  | 0               | 40.60089 | 1.00E+100   | 0        | 0           |                |                             |                           | 0        | 0           | 0          | 0         | 0               |
| toluene               | 215             | 40.60089 | 150.8295626 | 1555.205 | 3110.41     | 2.64414E-12    | 3.99E-10                    | 1.07E-10                  | 1.889765 | 0.979889075 | 1          | 7.2123935 | 6.486026393     |

|           |           |             |           |
|-----------|-----------|-------------|-----------|
| SUBTOTALS | 51.014386 | 9.90302359  | <b>ES</b> |
|           |           | 0.194122176 | <b>EI</b> |
|           |           | 0.80588     | <b>BI</b> |

**Table S18.** SHI calculation for the synthesis of **6a**

| Substance             | MW     | mass (g) | Molar fraction | OB          | LD50 dermal (mg/kg) | LC50 (g/m <sup>3</sup> 4 h) | FLP(deg C) | LEL | IS (N m) | LBT (cm <sup>3</sup> /10 g) | OEL (mmol/m <sup>3</sup> ) | Q (R-phrases) |
|-----------------------|--------|----------|----------------|-------------|---------------------|-----------------------------|------------|-----|----------|-----------------------------|----------------------------|---------------|
| 4-nitrotoluene        | 137.14 | 0.061555 | 0.01268768     | -2.0417092  | -                   | -                           | -          | -   | 1E+100   | 0                           | -                          | 78125         |
| 4-methylcyclohexanone | 112.17 | 0.49     | 0.10099855     | -2.42489079 | -                   | -                           | 48         | -   | 1E+100   | 0                           | -                          | 750           |
| Toluene               | 92.4   | 4.3      | 0.88631377     | -3.11688312 | 5000                | 25.7                        | 4.4        | 1.2 | 1E+100   | 0                           | 2.08                       | 937500        |

| Substance             | CGP        | CLP  | FP         | OBP        | XVP        | OELP        | RPP         | Ω           | SHZI contribution |
|-----------------------|------------|------|------------|------------|------------|-------------|-------------|-------------|-------------------|
| 4nitrotoluene         | 0          | 0    | 0          | 0.24792183 | 0          | 0           | 1.97519198  | 2.22311381  | 0.028206167       |
| 4-methylcyclohexanone | 0          | 0    | 0.71028037 | 0.6062227  | 0          | 0           | 1.16064616  | 2.47714923  | 0.25018847        |
| Toluene               | 0.02023346 | 0.45 | 0.82191781 | 0.77922078 | 1.41666667 | 1.959615385 | 2.410851413 | 7.858505514 | 6.965101645       |

|           |            |             |             |
|-----------|------------|-------------|-------------|
| SUBTOTALS | 13.7712733 | 7.728882891 | <b>SHZS</b> |
|           |            | 0.561232264 | <b>SHZI</b> |
|           |            | 0.438767736 | <b>SHI</b>  |

**e) Tetrahedron Letters, 2006, 47, 9275**

**General Procedure:** In a 50-ml three-necked flask, equipped with a stirrer, was charged with t-BuOK (1.5 mmol), DAB 1 (6 mol% with respect to the amine), CuI (5 mol% with respect to the amine) under nitrogen at room temperature. The aniline (1 mmol) and aryl iodide (4.0 mmol) were added. The dried toluene (5 ml) was added via syringe. Care was taken to make sure the contents stirred well. The reaction mixture was then heated in an oil bath of 120 °C for 48 hours. The reaction mixture was then cooled, mixed with 15 ml of diethyl ether, and filtered through a pad of silica to remove any insoluble residues. The solvent was removed under reduced pressure and the residue was then purified by column chromatography on silica gel (eluent: 60–90°C petroleum) to obtain the analytically pure product.[9]

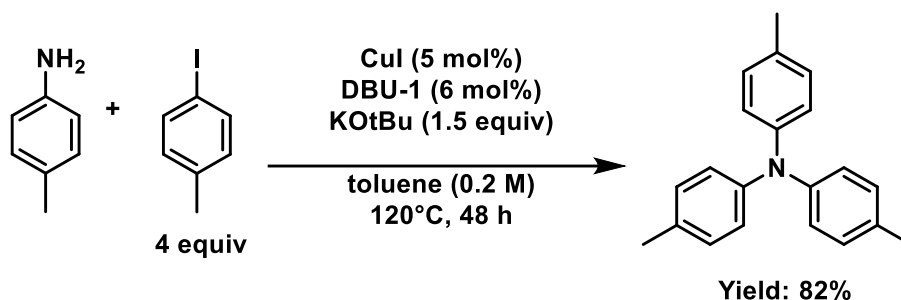

**Scheme S10.** Synthesis of **6a**. [9]

**Table S19.** E-Factor calculation

| Reactant            |        |
|---------------------|--------|
| 4-methylaniline     | 0.11   |
| 4-methyliodobenzene | 0.87   |
| tBuOK               | 0.168  |
| Solvent             |        |
| toluene             | 4.335  |
| Catalyst            |        |
| CuI                 | 0.0095 |
| Workup              |        |
| Et <sub>2</sub> O   | 13     |

|                              |       |
|------------------------------|-------|
| Silica                       | 5     |
| <b>Purification</b>          |       |
| Silica                       | 25    |
| eluent                       | 250   |
| <b>Recovery of Materials</b> |       |
| eluent                       | 247.5 |
| <b>Product</b>               |       |
| p-toluiditriphenylammine     | 0.24  |
| <b>E-Factor</b>              |       |
| <b>&gt;100</b>               |       |

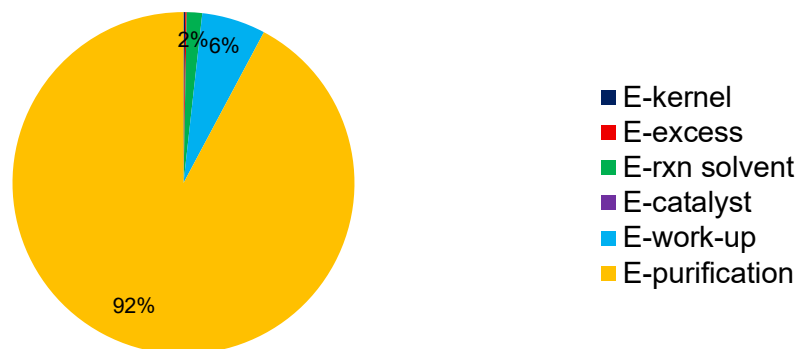

Figure S10. E-Factor distribution

Table S20. EI and BI calculations for the synthesis of 6a

| Substance          | MW     | Mass (g) | Molar fraction | Carbon atoms | SFP  | GWP      | LD50 oral (mg/kg) | LC50 (g/m <sup>3</sup> 4 h) | H (atm m <sup>3</sup> /mol) | log Kow |
|--------------------|--------|----------|----------------|--------------|------|----------|-------------------|-----------------------------|-----------------------------|---------|
| 4-methylaniline    | 107.15 | 0.19     | 0.034154       | 7            |      | 2.874475 | 620               | 0.64                        | 0.0000019                   | 0.91    |
| 4-methylidobenzene | 218.04 | 0.87     | 0.15639        | 7            |      | 1.412585 |                   |                             | 1E-100                      | 3.71    |
| KOtBu              | 112.21 | 0.168    | 0.0302         | 4            |      | 1.568488 | 690               |                             | 1E-100                      | -1E+100 |
| toluene            | 92.4   | 4.335    | 0.779256       | 7            | 0.87 | 3.333333 | 636               | 25.87                       | 0.00663                     | 2.73    |

| Substance          | Koc | Z(air)   | Z(water)    | Z(soil)  | Z(sediment) | fugacity (atm) | C(water) mol/m <sup>3</sup> | C(air) mol/m <sup>3</sup> | INHTP    | INGTP       | BCP         | Ω         | EI contribution |
|--------------------|-----|----------|-------------|----------|-------------|----------------|-----------------------------|---------------------------|----------|-------------|-------------|-----------|-----------------|
| 4-methylaniline    | 3   | 40.60089 | 526315.7895 | 84192.13 | 168384.3    | 8.47675E-14    | 4.461E-08                   | 3.44E-12                  | 2.448886 | 112.446551  | 0.041380906 | 117.8114  | 4.02375794      |
| 4-methylidobenzene | 0   | 40.60089 | 1E+100      | 8.2E+96  | 1.64E+97    | 2.2931E-108    | 2.293E-08                   | 9.3E-107                  | 0        | 0           | 5.556483128 | 6.969068  | 1.089895585     |
| KOtBu              | 0   | 40.60089 | 0           | 0        | 0           | 2.19499E-12    | 0                           | 8.91E-11                  | 0        | 0           | 0           | 1.5684877 | 0.047367594     |
| toluene            | 220 | 40.60089 | 150.8295626 | 1594.085 | 3188.171    | 2.63647E-12    | 3.98E-10                    | 1.07E-10                  | 1.884283 | 0.977046665 | 1           | 8.0646634 | 6.284435674     |

|           |           |             |           |
|-----------|-----------|-------------|-----------|
| SUBTOTALS | 134.41362 | 11.44545679 | <b>ES</b> |
|           |           | 0.085151022 | <b>EI</b> |
|           |           | 0.91485     | <b>BI</b> |

Table S21. SHI calculations for the synthesis of 6a

| Substance       | MW     | mass (g) | Molar fraction | OB          | LD50 dermal (mg/kg) | LC50 (g/m <sup>3</sup> 4 h) | FLP(deg C) | LEL | IS (N m) | OEL (mmol/m <sup>3</sup> ) | Q (R-phrases) |
|-----------------|--------|----------|----------------|-------------|---------------------|-----------------------------|------------|-----|----------|----------------------------|---------------|
| 4-methylaniline | 107.15 | 0.19     | 0.034154       | -2.31451237 | 890                 | 0.64                        | 87         | 1.3 | 1E+100   | 0.084                      | 56250000      |
| 4-iodotoluene   | 218.04 | 0.87     | 0.15639        | -1.06402495 |                     |                             |            |     | 1E+100   |                            | 225           |
| toluene         | 92.4   | 4.335    | 0.779256       | -3.11688312 | 5000                | 25.7                        | 4.4        | 1.2 | 1E+100   | 2.08                       | 937500        |
| KotBu           | 112.21 | 0.168    | 0.0302         | -1.63978255 |                     |                             | 14         | 2.3 | 1E+100   | 0.084                      | 20            |

| Substance       | CGP         | CLP         | FP          | OBP         | XVP         | OELP        | RPP         | Ω           | SHZI contribution |
|-----------------|-------------|-------------|-------------|-------------|-------------|-------------|-------------|-------------|-------------------|
| 4-methylaniline | 0.8125      | 2.528089888 | 0.633333333 | 0.690620625 | 1.307692308 | 48.52380952 | 3.12868113  | 57.62472681 | 1.968128365       |
| 4-iodotoluene   | 0           | 0           | 0           | 0.321042011 | 0           | 0           | 0.949562931 | 1.270604941 | 0.198710462       |
| toluene         | 0.020233463 | 0.45        | 0.821917808 | 0.779220779 | 1.416666667 | 1.959615385 | 2.410851413 | 7.858505514 | 6.12378598        |
| KotBu           | 0           | 0           | 0.794425087 | 0.409945638 | 0.739130435 | 0           | 0.525218535 | 2.468719694 | 0.074554181       |

|           |            |             |      |
|-----------|------------|-------------|------|
| SUBTOTALS | 245.466697 | 12.94819297 | SHZS |
|           |            | 0.052749286 | SHZI |
|           |            | 0.947250714 | SHI  |

f) Chem. Sci. 2020,11, 4074-4084

**General Procedure:** Reaction conditions: (first step) Pd/C (2 mol%), TsOH (10 mol%), 6 (0.5 mmol), 2 (0.5 mmol), mesitylene (2 mL), Ar (1 atm), temperature 160 °C, and time 18 h. (second step) After the first step, 2 (0.55 mmol) was added to the reaction mixture, and the reaction was continued for further 2 h under the same conditions.

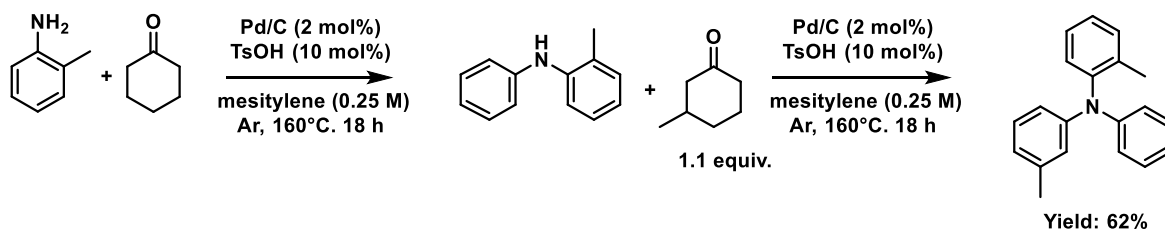

**Scheme S11.** Synthesis of 2-methyl-N-phenyl-N-(m-tolyl)aniline. [10]

**Table S22.** E-Factor calculation

| Reactant                             |                |
|--------------------------------------|----------------|
| 2-methylaniline                      | 0.0536         |
| 3-methylcyclohexanone                | 0.0561         |
| cyclohexanone                        | 0.0540         |
| Solvent                              |                |
| mesitylene                           | 1.728          |
| Catalyst                             |                |
| Pd/C                                 | 0.0106         |
| TsOH                                 | 0.0086         |
| Workup                               |                |
| Purification                         |                |
| Silica                               | 25             |
| eluent                               | 250            |
| Recovery of Materials                |                |
| eluent                               | 247.5          |
| Pd/C                                 | 0.0106         |
| Product                              |                |
| 3-methyl-N-phenyl-N-(m-tolyl)aniline | 0.085          |
| <b>E-Factor</b>                      | <b>&gt;100</b> |

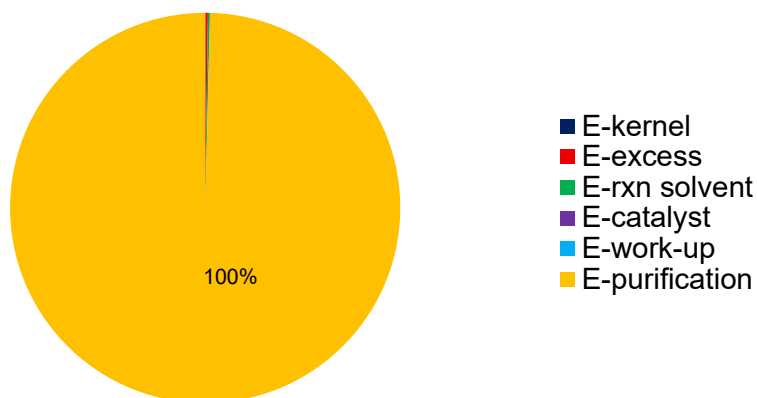

Figure S11. E-Factor distribution

Tale S23. EI and BI calculations for the synthesis of 2-methyl-N-phenyl-N-(m-tolyl)aniline

| Substance             | MW     | Mass (g) | Molar fraction | Carbon atoms | SFP | GWP      | LD50 oral (mg/kg) | LC50 (g/m <sup>3</sup> 4 h) | H (atm m <sup>3</sup> /mol) | log Kow |
|-----------------------|--------|----------|----------------|--------------|-----|----------|-------------------|-----------------------------|-----------------------------|---------|
| 2-methylaniline       | 107.15 | 0.0536   | 0.027215       | 7            |     | 2.874475 | 670               | 3.8                         | 0.0000002                   | 1.32    |
| 3-methylcyclohexanone | 112.17 | 0.056    | 0.028434       | 7            |     | 2.745832 | 800               | 10                          | 0.000105                    | 1.82    |
| cyclohexanone         | 98.15  | 0.0539   | 0.027367       | 6            |     | 2.689761 | 2270              | 6.2                         | 0.000012                    | 0.86    |
| mesitilene            | 120.19 | 1.72     | 0.873318       | 9            |     | 3.294783 | 5000              | 18                          | 1.97E-02                    | 3.42    |
| ptsOH                 | 190.22 | 0.086    | 0.043666       | 7            |     | 1.619178 | 1410              | 5000                        | 2.78E-09                    | 0.9     |

| Substance             | Koc | Z(air)     | Z(water)   | Z(soil)    | Z(sediment) | fugacity (atm) | C(water) mol/m <sup>3</sup> | C(air) mol/m <sup>3</sup> | INHTP      | INGTP       | BCP        | ARD P | Ω          | EI contribution |
|-----------------------|-----|------------|------------|------------|-------------|----------------|-----------------------------|---------------------------|------------|-------------|------------|-------|------------|-----------------|
| 2-methylaniline       | 9   | 40.6008932 | 5000000    | 2055867.39 | 4111734.78  | 9.12312E-15    | 4.562E-08                   | 3.70407E-13               | 0.04438937 | 106.3900731 | 0.08480081 | 0     | 109.393738 | 2.977153783     |
| 3-methylcyclohexanone | 27  | 40.60089   | 9523.80952 | 12383.28   | 24766.57    | 1.46658E-12    | 1.397E-08                   | 5.95E-11                  | 2.711605   | 27.2828954  | 0.20342297 | 0     | 32.943756  | 0.93670998      |
| cyclohexanone         | 3   | 40.60089   | 83333.3333 | 11880.75   | 23761.5     | 4.88983E-13    | 4.075E-08                   | 1.99E-11                  | 1.458216   | 28.0510888  | 0.03791403 | 0     | 32.236979  | 0.88224076      |
| mesitilene            | 107 | 40.60089   | 50.7614213 | 2627.598   | 5255.195    | 2.03208E-12    | 1.032E-10                   | 8.25E-11                  | 2.087309   | 0.03223786  | 3.34502986 | 0     | 8.7593595  | 7.64970720      |
| ptsOH                 | 3   | 40.60089   | 359712230. | 56231582   | 1.12E+08    | 7.25475E-17    | 2.610E-08                   | 2.95E-15                  | 2.68E-07   | 28.9215321  | 0.04066305 | 0     | 30.581373  | 1.33536334      |

|           |             |             |           |
|-----------|-------------|-------------|-----------|
| SUBTOTALS | 183.3338328 | 12.44581174 | <b>ES</b> |
|           |             | 0.067886061 | <b>EI</b> |
|           |             | 0.93211     | <b>BI</b> |

Table S24. SHI calculations for the synthesis of 3-methyl-N-phenyl-N-(m-tolyl)aniline

| Substance             | MW     | mass (g) | Molar fraction | O consumption/litration rxn | #O substrate | #O products | OB          | LD50 dermal (mg/kg) | LC50 (g/m <sup>3</sup> 4 h) | FLP(de g C) | LE L | IS (N m) | OEL (mmol/m <sup>3</sup> ) | Q (R-phrases) |
|-----------------------|--------|----------|----------------|-----------------------------|--------------|-------------|-------------|---------------------|-----------------------------|-------------|------|----------|----------------------------|---------------|
| 2-methylaniline       | 107.15 | 0.0536   | 0.02745761     | 18.5                        | 0            | 18.5        | -2.7624825  | 3250                | 3.78                        | 85          | 1.5  | 1E+100   | 0.0047                     | 0.0047        |
| 3-methylcyclohexanone | 112.17 | 0.056    | 0.02868705     | 17                          | 1            | 18          | -2.42489079 | 2000                | 6.2                         | 44          | 1.1  | 1E+100   | 0.818                      |               |
| cyclohexanone         | 98.15  | 0.0539   | 0.02761129     | 17                          | 1            | 18          | -2.77126847 | 947                 | 6.2                         | 44          | 1.1  | 1E+100   | 0.208                      | 0.416         |
| pTsOH                 | 190.22 | 0.0086   | 0.00440551     | 19                          | 3            | 22          | -1.59814951 | 2000                | 18                          | 184         |      | 1E+100   |                            |               |
| mesitilene            | 120.19 | 1.78     | 0.91183853     | 24                          | 0            | 24          | -3.19494134 | 3160                | 18                          | 48          | 0.9  | 1E+100   | 1.022                      | 0.0047        |

| Substance             | CGP         | CLP         | FP          | OBP         | XVP         | OELP        | RPP         | Ω           | SHZI contribution |
|-----------------------|-------------|-------------|-------------|-------------|-------------|-------------|-------------|-------------|-------------------|
| 2-methylaniline       | 0.137566138 | 0.692307692 | 0.636871508 | 0.690620625 | 1.133333333 | 867.2340426 | 1.724986722 | 872.2497286 | 23.94989265       |
| 3-methylcyclohexanone | 0.083870968 | 1.125       | 0.719242902 | 0.606222698 | 1.545454545 | 0           | 1.899125861 | 5.978916974 | 0.17151752        |
| cyclohexanone         | 0.083870968 | 2.37592397  | 0.719242902 | 0.692817117 | 1.545454545 | 9.798076923 | 2.828038805 | 18.04342523 | 0.498202254       |
| pTsOH                 | 0.028888889 | 1.125       | 0.498905908 | 0.399537378 | 0           | 0           | 1.424344396 | 3.476676571 | 0.01531654        |
| mesitilene            | 0.028888889 | 0.712025316 | 0.710280374 | 0.798735336 | 1.888888889 | 0           | 1.424344396 | 5.5631632   | 5.07270657        |

|           |             |             |      |
|-----------|-------------|-------------|------|
| SUBTOTALS | 905.3119105 | 29.70763554 | SHZS |
|           |             | 0.032814807 | SHZI |
|           |             | 0.967185193 | SHI  |

**General Procedure:** Reaction conditions: (first step) Pd/C (2 mol%), TsOH (10 mol%), 6 (0.5 mmol), 2 (0.5 mmol), mesitylene (2 mL), Ar (1 atm), temperature 160 °C, and time 18 h. (second step) After the first step, 2 (0.55 mmol) was added to the reaction mixture, and the reaction was continued for further 2 h under the same conditions.

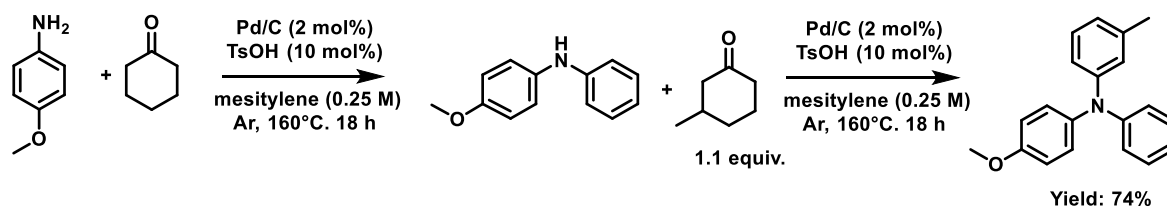

**Scheme S12.** Synthesis of *N*-(4-methoxyphenyl)-3-methyl-*N*-phenylaniline.[10]

**Table S25.** E-Factor calculation

| Reactant                                                      |                |
|---------------------------------------------------------------|----------------|
| 4-methoxyaniline                                              | 0.061575       |
| 3-methoxycyclohexanone                                        | 0.05358        |
| cyclohexanone                                                 | 0.0512215      |
| Solvent                                                       |                |
| mesitylene                                                    | 1.728          |
| Catalyst                                                      |                |
| Pd/C                                                          | 0.0106         |
| TsOH                                                          | 0.0086         |
| Workup                                                        |                |
| Purification                                                  |                |
| Silica                                                        | 25             |
| eluent                                                        | 250            |
| Recovery of Materials                                         |                |
| eluent                                                        | 247.5          |
| Pd/C                                                          | 0.0106         |
| Product                                                       |                |
| <i>N</i> -(4-methoxyphenyl)-3-methyl- <i>N</i> -phenylaniline | 0.107          |
| <b>E-Factor</b>                                               | <b>&gt;100</b> |

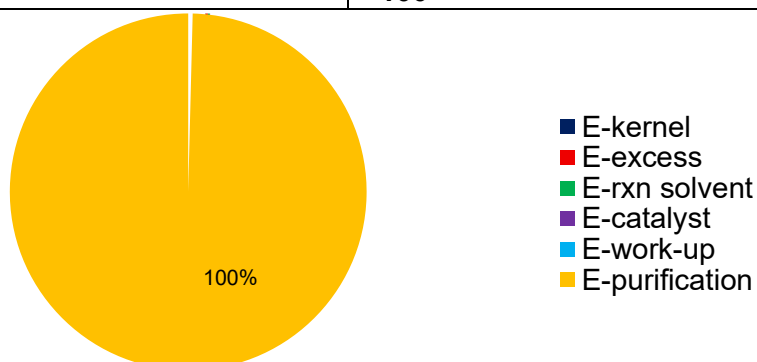

**Figure S12.** E-Factor distribution

**Table S26.** EI and BI calculations for the synthesis of 2-methyl-N-phenyl-N-(m-tolyl)aniline

| Substance             | MW     | Mass (g) | Molar fraction | Carbon atoms | alpha # acidic Hs | GWP      | LD50 oral (mg/kg) | LC50 (g/m3 4 h) | H (atm m3/mol) | log Kow |
|-----------------------|--------|----------|----------------|--------------|-------------------|----------|-------------------|-----------------|----------------|---------|
| 4-methoxyaniline      | 123.15 | 0.0616   | 0.3311828      | 7            | 0                 | 2.501015 | 1400              | 0.05            | 0.0000016      | 0.95    |
| 3-methylcyclohexanone | 112.17 | 0.056    | 0.30107527     | 7            | 0                 | 2.745832 | 800               | 10              | 0.00026        | 1.11    |
| cyclohexanone         | 93.13  | 0.0512   | 0.27526882     | 6            | 0                 | 2.834747 | 2270              | 6.2             | 0.00012        | 0.86    |
| mesitilene            | 190.22 | 0.0086   | 0.04623656     | 9            | 0                 | 2.0818   | 5000              | 18              | 1.97E-02       | 3.42    |
| ptsOH                 | 190.22 | 0.0086   | 0.04623656     | 7            | 0                 | 1.619178 | 1410              | 5000            | 2.78E-09       | 0.9     |

| Substance             | Koc  | Z(air)   | Z(water)    | Z(soil)  | Z(sediment) | fugacity (atm) | C(water) mol/m3 | C(air) mol/m3 | INHTP    | INGTP       | BCP         | Ω         | EI contribution |
|-----------------------|------|----------|-------------|----------|-------------|----------------|-----------------|---------------|----------|-------------|-------------|-----------|-----------------|
| 4-methoxyaniline      | 4    | 40.60089 | 6250000     | 1096239  | 2192477     | 6.42345E-15    | 4.015E-08       | 2.61E-13      | 2.375297 | 44.81085331 | 0.044381298 | 49.731547 | 16.47023264     |
| 3-methylcyclohexanone | 5    | 40.60089 | 3846.153846 | 975.1058 | 1950.212    | 1.8426E-12     | 7.087E-09       | 7.48E-11      | 3.406832 | 13.84301407 | 0.058721887 | 20.0544   | 6.037883847     |
| cyclohexanone         | 3    | 40.60089 | 83333.33333 | 11880.75 | 23761.5     | 5.15341E-13    | 4.295E-08       | 2.09E-11      | 1.536818 | 29.56313074 | 0.037914034 | 33.97261  | 9.351600234     |
| mesitilene            | 1078 | 40.60089 | 50.76142132 | 2627.598 | 5255.195    | 1.28396E-12    | 6.518E-11       | 5.21E-11      | 1.31886  | 0.020369407 | 3.345029868 | 6.7660596 | 0.312839315     |
| ptsOH                 | 3    | 40.60089 | 359712230.2 | 56231582 | 1.12E+08    | 7.25475E-17    | 2.610E-08       | 2.95E-15      | 2.68E-07 | 28.92153212 | 0.040663055 | 30.581373 | 1.413977472     |

|                  |           |             |           |
|------------------|-----------|-------------|-----------|
| <b>SUBTOTALS</b> | 141.10599 | 33.58653351 | <b>ES</b> |
|                  |           | 0.238023443 | <b>EI</b> |
|                  |           | 0.76198     | <b>BI</b> |

**Table S27.** SHI calculations for the synthesis of 3-methyl-N-phenyl-N-(m-tolyl)aniline

| Substance             | MW     | mass (g) | Molar fraction | O consumption/liberation rxn | #O substrate | #O products | OB         | LD50 dermal (mg/kg) | LC50 (g/m3 4 h) | FLP(deg C) | LEL | IS (Nm) | OEL (mmol/m^3) | Q (R-phrases) |
|-----------------------|--------|----------|----------------|------------------------------|--------------|-------------|------------|---------------------|-----------------|------------|-----|---------|----------------|---------------|
| 4-methoxyaniline      | 123.15 | 0.0616   | 0.03155576     | 18.5                         | 1            | 18.5        | 2.27365002 | 3200                | 0.05            | 119        | 1.1 | 1E+100  | 0.0102         | 22968750      |
| 3-methylcyclohexanone | 107.16 | 0.0536   | 0.02745761     | 17                           | 1            | 18          | 2.53826054 | 2000                | 6.2             | 44         | 1.1 | 1E+100  |                | 50625         |
| cyclohexanone         | 93.13  | 0.0512   | 0.02622816     | 17                           | 1            | 18          | 2.92064856 | 947                 | 6.2             | 44         | 1.1 | 1E+100  | 0.416          | 10125000      |
| pTsOH                 | 190.22 | 0.0086   | 0.00440551     | 19                           | 3            | 22          | 1.59814951 | 2000                | 18              | 184        |     | 1E+100  |                | 3375          |
| mesitilene            | 120.19 | 1.78     | 0.91183853     | 24                           | 0            | 24          | 3.19494134 | 3160                | 18              | 48         | 0.9 | 1E+100  |                | 3375          |

| Substance             | CGP        | CLP        | FP         | OBP        | XVP        | OELP       | RPP        | Ω          | SHZI contribution |
|-----------------------|------------|------------|------------|------------|------------|------------|------------|------------|-------------------|
| 4-methoxyaniline      | 10.4       | 0.703125   | 0.58163265 | 0.56841251 | 1.54545455 | 399.607843 | 2.97164999 | 416.378118 | 13.13912815       |
| 3-methylcyclohexanone | 0.08387097 | 1.125      | 0.7192429  | 0.63456514 | 1.54545455 | 0          | 1.89912586 | 6.00725941 | 0.164944985       |
| cyclohexanone         | 0.08387097 | 2.37592397 | 0.7192429  | 0.73016214 | 1.54545455 | 9.79807692 | 2.8280388  | 18.0807703 | 0.474225417       |
| pTsOH                 | 0.02888889 | 1.125      | 0.49890591 | 0.39953738 | 0          | 0          | 1.4243444  | 3.47667657 | 0.01531654        |
| mesitilene            | 0.02888889 | 0.71202532 | 0.71028037 | 0.79873534 | 1.88888889 | 0          | 1.4243444  | 5.5631632  | 5.07270657        |

|                  |            |             |             |
|------------------|------------|-------------|-------------|
| <b>SUBTOTALS</b> | 449.505987 | 18.86632166 | <b>SHZS</b> |
|                  |            | 0.041971236 | <b>SHZI</b> |
|                  |            | 0.958028764 | <b>SHI</b>  |

g) This work under batch.

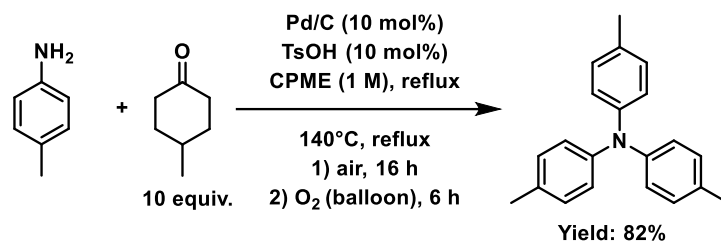

**Scheme S13.** Synthesis of **6a**

**Table S28.** E-Factor calculation

| Reactant                 |                |
|--------------------------|----------------|
| 4-methylaniline          | 0.05           |
| 4-methylcyclohexanone    | 0.49           |
| ossigeno                 | 0.18304        |
| Solvent                  |                |
| CPME                     | 0.43           |
| Catalyst                 |                |
| Pd/C                     | 0.053          |
| TsOH                     | 0.0086         |
| Workup                   |                |
| Purification             |                |
| Silica                   | 25             |
| eluent                   | 250            |
| Recovery of Materials    |                |
| eluent                   | 247.5          |
| Pd/C                     | 0.053          |
| Product                  |                |
| p-toluiditriphenylammine | 0.11           |
| <b>E-Factor</b>          | <b>&gt;100</b> |

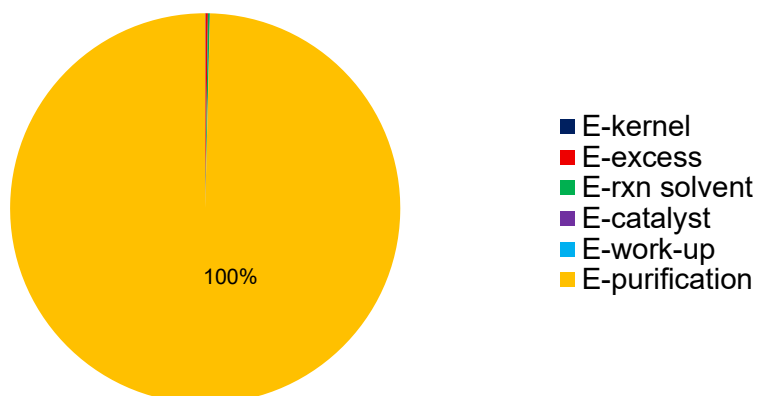

**Figure S13.** E-Factor distribution

**Table S29.** EI and BI calculation for the synthesis of **6a**

| Substance             | MW     | Mass (g) | Molar fraction | Carbon atoms | SFP | GWP      | LD50 oral (mg/kg) | LC50 (g/m <sup>3</sup> 4 h) | H (atm m <sup>3</sup> /mol) | log Kow |
|-----------------------|--------|----------|----------------|--------------|-----|----------|-------------------|-----------------------------|-----------------------------|---------|
| 4-methylaniline       | 107.15 | 0.052    | 0.046099       | 7            |     | 2.874475 | 620               | 0.64                        | 0.0000019                   | 0.91    |
| 4-methylcyclohexanone | 112.17 | 0.56     | 0.496454       | 7            |     | 2.745832 | 1800              |                             | 1E-100                      | 1.38    |
| pTsOH                 | 190.22 | 0.086    | 0.076241       | 7            |     | 1.619178 | 1410              | 5000                        | 2.78E-09                    | 0.9     |
| CPME                  | 100.16 | 0.43     | 0.381206       | 6            |     | 2.635783 | 1000              | 21.5                        | 2.00E-02                    | 1.6     |

| Substance             | Koc | Z(air)   | Z(water)    | Z(soil)  | Z(sediment) | fugacity (atm) | C(water) mol/m <sup>3</sup> | C(air) mol/m <sup>3</sup> | INHTP    | INGTP       | BCP         | Ω         | EI contribution |
|-----------------------|-----|----------|-------------|----------|-------------|----------------|-----------------------------|---------------------------|----------|-------------|-------------|-----------|-----------------|
| 4-methylaniline       | 3   | 40.60089 | 526315.7895 | 84192.13 | 168384.3    | 8.47675E-14    | 4.461E-08                   | 3.44E-12                  | 2.448886 | 112.4466551 | 0.041380906 | 117.8114  | 5.431021845     |
| 4-methylcyclohexanone | 0   | 40.60089 | 1E+100      | 8.2E+96  | 1.64E+97    | 4.4574E-108    | 4.457E-08                   | 1.8E-106                  | 0        | 38.69609107 | 0.09418896  | 41.536112 | 20.62076495     |
| pTsOH                 | 3   | 40.60089 | 359712230.2 | 54860080 | 1.1E+08     | 7.25601E-17    | 2.610E-08                   | 2.95E-15                  | 2.68E-07 | 28.92656898 | 0.040663055 | 30.58641  | 2.331942614     |
| CPME                  | 16  | 40.60089 | 50          | 38.21829 | 76.43658    | 2.45281E-12    | 1.226E-10                   | 9.96E-11                  | 2.109333 | 0.191644755 | 0.138420368 | 5.075181  | 1.93468775      |

|           |          |             |           |
|-----------|----------|-------------|-----------|
| SUBTOTALS | 195.0091 | 30.31841718 | <b>ES</b> |
|           |          | 0.155471807 | <b>EI</b> |
|           |          | 0.84453     | <b>BI</b> |

**Table S30.** SHI calculation for the synthesis of **6a**

| Substance             | MW     | mass (g) | Molar fraction | OB          | LD50 dermal (mg/kg) | LC50 (g/m <sup>3</sup> 4 h) | FLP(deg C) | LEL | IS (N m) | OEL (mmol/m <sup>3</sup> ) | Q (R-phrases) |
|-----------------------|--------|----------|----------------|-------------|---------------------|-----------------------------|------------|-----|----------|----------------------------|---------------|
| 4-methylaniline       | 107.15 | 0.052    | 0.046099       | -2.7624825  | 890                 | 0.64                        | 87         | 1.3 | 1E+100   | 0.084                      | 56250000      |
| pTsOH                 | 190.22 | 0.086    | 0.076241       | -1.59814951 | 2000                | 5000                        | 184        |     | 1E+100   |                            | 3375          |
| 4-methylcyclohexanone | 112.17 | 0.56     | 0.496454       | -2.71017206 |                     |                             | 48         |     | 1E+100   |                            | 750           |
| CPME                  | 100.16 | 0.43     | 0.381206       | -2.71565495 | 2000                | 21.5                        | -1         | 1.1 | 1E+100   |                            | 33750         |

| Substance             | CGP         | CLP         | FP          | OBP         | XVP         | OELP        | RPP         | Ω           | SHZI contribution |
|-----------------------|-------------|-------------|-------------|-------------|-------------|-------------|-------------|-------------|-------------------|
| 4-methylaniline       | 0.8125      | 2.528089888 | 0.633333333 | 0.690620625 | 1.307692308 | 48.52380952 | 3.12868113  | 57.62472681 | 2.656459037       |
| pTsOH                 | 0.000104    | 1.125       | 0.498905908 | 0.399537378 | 0           | 0           | 1.424344396 | 3.447891682 | 0.262871174       |
| 4-methylcyclohexanone | 0           | 0           | 0.710280374 | 0.677543015 | 0           | 0           | 1.160646156 | 2.548469545 | 1.265197647       |
| CPME                  | 0.024186047 | 1.125       | 0.838235294 | 0.678913738 | 1.545454545 | 0           | 1.828038805 | 6.039828429 | 2.302416866       |

|           |             |             |             |
|-----------|-------------|-------------|-------------|
| SUBTOTALS | 69.66091646 | 6.486944724 | <b>SHZS</b> |
|           |             | 0.093121725 | <b>SHZI</b> |
|           |             | 0.906878275 | <b>SHI</b>  |

The calculations of ES, BI, and SHI were performed using the synthesis of product **6e** as a representative example.

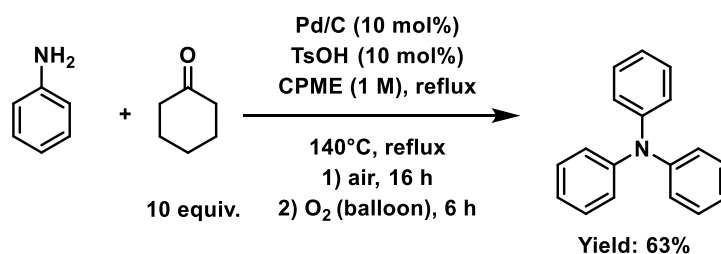

**Scheme S14.** Synthesis of **6e**

**Table S31.** EI and BI calculation for the synthesis of **6e**

| Substance     | MW    | Mass (g) | Molar fraction | Carbon atoms | alpha # acidic Hs | GWP      | LD50 oral (mg/kg) | LC50 (g/m <sup>3</sup> 4 h) | H (atm m <sup>3</sup> /mol) | log Kow |
|---------------|-------|----------|----------------|--------------|-------------------|----------|-------------------|-----------------------------|-----------------------------|---------|
| aniline       | 93.13 | 0.05     | 0.047348       | 6            | 0                 | 2.834747 | 102               | 3.3                         | 0.0000019                   | 0.91    |
| cyclohexanone | 98.15 | 0.49     | 0.464015       | 6            | 0                 | 2.689761 | 2270              | 6.2                         | 0.000012                    | 0.86    |

|       |        |       |          |   |   |          |      |      |          |     |
|-------|--------|-------|----------|---|---|----------|------|------|----------|-----|
| pTsOH | 190.22 | 0.086 | 0.081439 | 7 | 0 | 1.619178 | 1410 | 5000 | 2.78E-09 | 0.9 |
| CPME  | 100.16 | 0.43  | 0.407197 | 6 | 0 | 2.635783 | 1000 | 21.5 | 2.00E-02 | 1.6 |

| Substance     | K <sub>oc</sub> | Z(air)   | Z(water)    | Z(soil)  | Z(sediment) | fugacity (atm) | C(water) mol/m <sup>3</sup> | C(air) mol/m <sup>3</sup> | INHTP    | INGTP       | BCP         | ARDP | Ω         | EI contribution |
|---------------|-----------------|----------|-------------|----------|-------------|----------------|-----------------------------|---------------------------|----------|-------------|-------------|------|-----------|-----------------|
| aniline       | 3               | 40.60089 | 526315.7895 | 84192.13 | 168384.3    | 9.75285E-14    | 5.133E-08                   | 3.96E-12                  | 0.546433 | 786.3947971 | 0.041380906 | 0    | 789.81736 | 37.396655       |
| cyclohexanone | 0               | 40.60089 | 83333.33333 | 68.36658 | 136.7332    | 4.91547E-13    | 4.1E-08                     | 2E-11                     | 1.465861 | 28.198161   | 0.037914034 | 0    | 32.391697 | 15.030238       |
| pTsOH         | 3               | 40.60089 | 359712230.2 | 54860080 | 1.1E+08     | 7.25601E-17    | 2.61E-08                    | 2.95E-15                  | 2.68E-07 | 28.92656898 | 0.040663055 | 0    | 30.58641  | 2.4909387       |
| CPME          | 16              | 40.60089 | 50          | 38.21829 | 76.43658    | 2.45281E-12    | 1.23E-10                    | 9.96E-11                  | 2.109333 | 0.191644755 | 0.138420368 | 0    | 5.075181  | 2.0665983       |

|           |           |             |    |
|-----------|-----------|-------------|----|
| SUBTOTALS | 857.87065 | 56.9844304  | ES |
|           |           | 0.066425434 | EI |
|           |           | 0.93357     | BI |

**Table S32.** SHI calculation for the synthesis of **6a**

|               | MW     | mass (g) | Molar fraction | O consumption/liberation rxn | #O substrate | #O products | OB          | LD50 dermal (mg/kg) | LC50 (g/m <sup>3</sup> 4 h) | FLP(deg C) | LEL | IS (N m) | OEL (mmol/m <sup>3</sup> ) | Q (R-phrases) |
|---------------|--------|----------|----------------|------------------------------|--------------|-------------|-------------|---------------------|-----------------------------|------------|-----|----------|----------------------------|---------------|
| aniline       | 93.13  | 0.05     | 0.051093       | 15.5                         | 0            | 15.5        | -2.66294427 | 442                 | 1.82                        | 76         | 1.2 | 1E+100   | 0.0831                     | 11275         |
| cyclohexanone | 98.15  | 0.49     | 0.500715       | 17                           | 1            | 18          | -2.77126847 | 947                 | 6.2                         | 44         | 1.1 | 1E+100   | 0.416                      | 10125000      |
| pTsOH         | 190.22 | 0.0086   | 0.008788       | 19                           | 3            | 22          | -1.59814951 | 2000                | 5000                        | 184        |     | 1E+100   |                            | 3375          |
| CPME          | 100.16 | 0.43     | 0.439403       | 17                           | 1            | 18          | -2.71565495 | 2000                | 21.5                        | -1         | 1.1 | 1E+100   |                            | 33750         |

|               | CGP         | CLP         | FP          | OBP         | XVP         | OELP        | RPP         | Ω           | SHZI contribution |
|---------------|-------------|-------------|-------------|-------------|-------------|-------------|-------------|-------------|-------------------|
| aniline       | 0.285714286 | 5.090497738 | 0.653295129 | 0.665736068 | 1.416666667 | 49.04933815 | 1.635816795 | 58.79706483 | 3.004141878       |
| cyclohexanone | 0.083870968 | 2.37592397  | 0.719242902 | 0.692817117 | 1.545454545 | 9.798076923 | 2.828038805 | 18.04342523 | 9.034619214       |
| pTsOH         | 0.000104    | 1.125       | 0.498905908 | 0.399537378 | 0           | 0           | 1.424344396 | 3.447891682 | 0.030300295       |
| CPME          | 0.024186047 | 1.125       | 0.838235294 | 0.678913738 | 1.545454545 | 0           | 1.828038805 | 6.039828429 | 2.653920115       |

|           |             |             |      |
|-----------|-------------|-------------|------|
| SUBTOTALS | 86.32821017 | 14.7229815  | SHZS |
|           |             | 0.170546586 | SHZI |
|           |             | 0.829453414 | SHI  |

### h) This work under FLOW

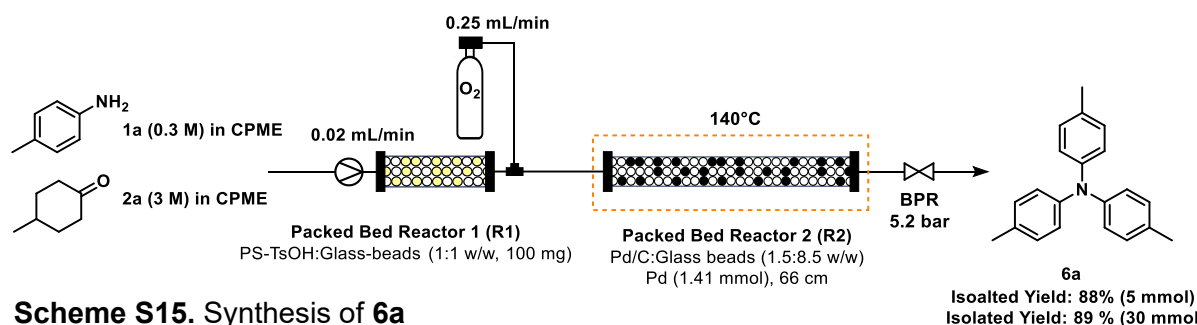

**Table S33.** E-Factor calculation

| Reactant (5 mmol)                     |       |
|---------------------------------------|-------|
| 4-methylaniline                       | 0.52  |
| 4-methylcyclohexanone                 | 5.7   |
| ossigeno                              | 0.20  |
| Solvent                               |       |
| CPME                                  | 14.36 |
| Catalyst                              |       |
| Workup                                |       |
| Purification                          |       |
| HBF <sub>4</sub> 48% H <sub>2</sub> O | 1.37  |
| heptane                               | 3.42  |

|                              |            |
|------------------------------|------------|
| CPME                         | 8.6        |
| H <sub>2</sub> O NaOH 3 M    | 2.24       |
| <b>Recovery of Materials</b> |            |
| CPME                         | 21.81      |
| 4-methylcyclohexanone        | 3.77       |
| heptano                      | 3.15       |
| <b>Product</b>               |            |
| p-toluiditriphenylammine     | 1.23       |
|                              |            |
| <b>E-Factor</b>              | <b>5.3</b> |

**Table S34.** E-Factor calculation

|                                       |            |
|---------------------------------------|------------|
| <b>Reactant (30 mmol)</b>             |            |
| 4-methylaniline                       | 3.20       |
| 4-methylcyclohexanone                 | 33.52      |
| ossigeno                              | 1.17       |
| <b>Solvent</b>                        |            |
| CPME                                  | 85.83      |
| <b>Catalyst</b>                       |            |
| <b>Workup</b>                         |            |
| <b>Purification</b>                   |            |
| HBF <sub>4</sub> 48% H <sub>2</sub> O | 8.19       |
| heptane                               | 20.45      |
| CPME                                  | 25.8       |
| H <sub>2</sub> O NaOH 3 M             | 13.40      |
| <b>Recovery of Materials</b>          |            |
| CPME                                  | 106.05     |
| 4-methylcyclohexanone                 | 21.99      |
| heptano                               | 18.82      |
| <b>Product</b>                        |            |
| p-toluiditriphenylammine              | 7.67       |
|                                       |            |
| <b>E-Factor</b>                       | <b>4.8</b> |

**Table S35.** EI and BI calculations for the synthesis of **6a**

| Substance             | MW     | Mass (g) | Molar fraction | Carbon atoms | GWP      | LD50 oral (mg/kg) | LC50 (g/m <sup>3</sup> 4 h) | H (atm m <sup>3</sup> /mol) | log Kow |
|-----------------------|--------|----------|----------------|--------------|----------|-------------------|-----------------------------|-----------------------------|---------|
| 4-methylaniline       | 107.15 | 0.52     | 0.022787       | 7            | 2.874475 | 620               | 0.64                        | 0.0000019                   | 0.91    |
| 4-methylcyclohexanone | 112.17 | 5.6      | 0.245399       | 7            | 2.745832 | 1800              |                             | 1E-100                      | 1.38    |
| CPME                  | 100.16 | 16.7     | 0.731814       | 6            | 2.635783 | 1000              | 21.5                        | 2.00E-02                    | 1.6     |

| Substance             | Koc | Z(air)      | Z(water)  | Z(soil)     | Z(sediment) | fugacity (atm) | C(water) mol/m <sup>3</sup> | C(air) mol/m <sup>3</sup> | INHTP    | INGTP       | BCP         | Ω           | EI contribution |
|-----------------------|-----|-------------|-----------|-------------|-------------|----------------|-----------------------------|---------------------------|----------|-------------|-------------|-------------|-----------------|
| 4-methylaniline       | 3   | 40.60089    | 526315.78 | 84192.13    | 168384.3    | 8.47675E-14    | 4.461E-08                   | 3.44E-12                  | 2.448886 | 112.4466551 | 0.041380906 | 117.8114    | 2.68457171      |
| 4-methylcyclohexanone | 0   | 40.60089322 | 1E+100    | 8.20399E+96 | 1.6408E+97  | 4.4574E-108    | 4.457E-08                   | 1.8097E-106               | 0        | 38.69609107 | 0.09418896  | 41.53611225 | 10.19291098     |
| CPME                  | 16  | 40.60089    | 50        | 38.21829    | 76.43658    | 2.45281E-12    | 1.23E-10                    | 9.96E-11                  | 2.109333 | 0.191644755 | 0.138420368 | 5.075181    | 3.71408948      |

|           |          |             |           |
|-----------|----------|-------------|-----------|
| SUBTOTALS | 125.7266 | 7.095598903 | <b>ES</b> |
|           |          | 0.056436736 | <b>EI</b> |
|           |          | 0.89909     | <b>BI</b> |

**Table S36.** SHI calculation for the synthesis of **6a**

| Substance             | MW     | mass (g) | Molar fraction | OB              | LD50 dermal (mg/kg) | LC50 (g/m <sup>3</sup> 4 h) | FLP(deg C) | LEL | IS (N m) | LBT (cm <sup>3</sup> /10 g) | OEL (mmol/m <sup>3</sup> ) | Q (R-phrases) |
|-----------------------|--------|----------|----------------|-----------------|---------------------|-----------------------------|------------|-----|----------|-----------------------------|----------------------------|---------------|
| 4-methylaniline       | 107.15 | 0.52     | 0.022787       | -<br>2.31451237 | 890                 | 0.64                        | 87         | 1.3 | 1E+100   | 0                           | 0.084                      | 56250000      |
| 4-methylcyclohexanone | 112.17 | 5.6      | 0.245399       | -<br>2.42489079 |                     |                             | 48         |     | 1E+100   | 0                           |                            | 750           |
| CPME                  | 100.16 | 16.7     | 0.731814       | -<br>2.71565495 | 2000                | 21.5                        | -1         | 1.1 | 1E+100   | 0                           |                            | 33750         |

| Substance             | CGP         | CLP         | FP          | OBP         | XVP         | OELP        | RPP         | Ω           | SHZI contribution |
|-----------------------|-------------|-------------|-------------|-------------|-------------|-------------|-------------|-------------|-------------------|
| 4-methylaniline       | 0.8125      | 2.528089888 | 0.633333333 | 0.690620625 | 1.307692308 | 48.52380952 | 3.12868113  | 57.62472681 | 1.313096316       |
| 4-methylcyclohexanone | 0           | 0           | 0.710280374 | 0.677543015 | 0           | 0           | 1.160646156 | 2.548469545 | 0.625391299       |
| CPME                  | 0.024186047 | 1.125       | 0.838235294 | 0.678913738 | 1.545454545 | 0           | 1.828038805 | 6.039828429 | 4.420032198       |

|           |             |             |             |
|-----------|-------------|-------------|-------------|
| SUBTOTALS | 66.21302478 | 6.358519814 | <b>SHZS</b> |
|           |             | 0.096031254 | <b>SHZI</b> |
|           |             | 0.903968746 | <b>SHI</b>  |

We present a heatmap comparing chemical methodologies based on Green Chemistry metrics, with the color gradient ranging from critical (red) to optimal (green) (Table S37). In addition, a histogram summarizing the evaluated green metrics for the synthesis of a radial pentagon (Figure S13) and the 1/SF analysis (Figure S14) are provided.

**Table S37.** Heatmap for the green metric analysed

|       | a.   | b.   | c.   | d.   | e.   | f.   | g.   | h. 5 mmol | h. 30 mmol |
|-------|------|------|------|------|------|------|------|-----------|------------|
| AE    | 0.71 | 0.53 | 0.78 | 0.79 | 0.52 | 0.87 | 0.87 | 0.88      | 0.89       |
| Yield | 0.91 | 0.78 | 0.9  | 0.9  | 0.82 | 0.74 | 0.82 | 0.88      | 0.89       |
| MRP   | 0.0  | 0.0  | 0.0  | 0.0  | 0.0  | 0.0  | 0.0  | 0.48      | 0.8        |
| BI    | 0.95 | 0.47 | 0.87 | 0.81 | 0.93 | 0.76 | 0.85 | 0.9       | 0.9        |
| SHI   | 0.89 | 0.42 | 0.44 | 0.44 | 0.88 | 0.96 | 0.91 | 0.9       | 0.9        |
| VMR   | 0.78 | 0.51 | 0.69 | 0.68 | 0.72 | 0.75 | 0.77 | 0.82      | 0.88       |

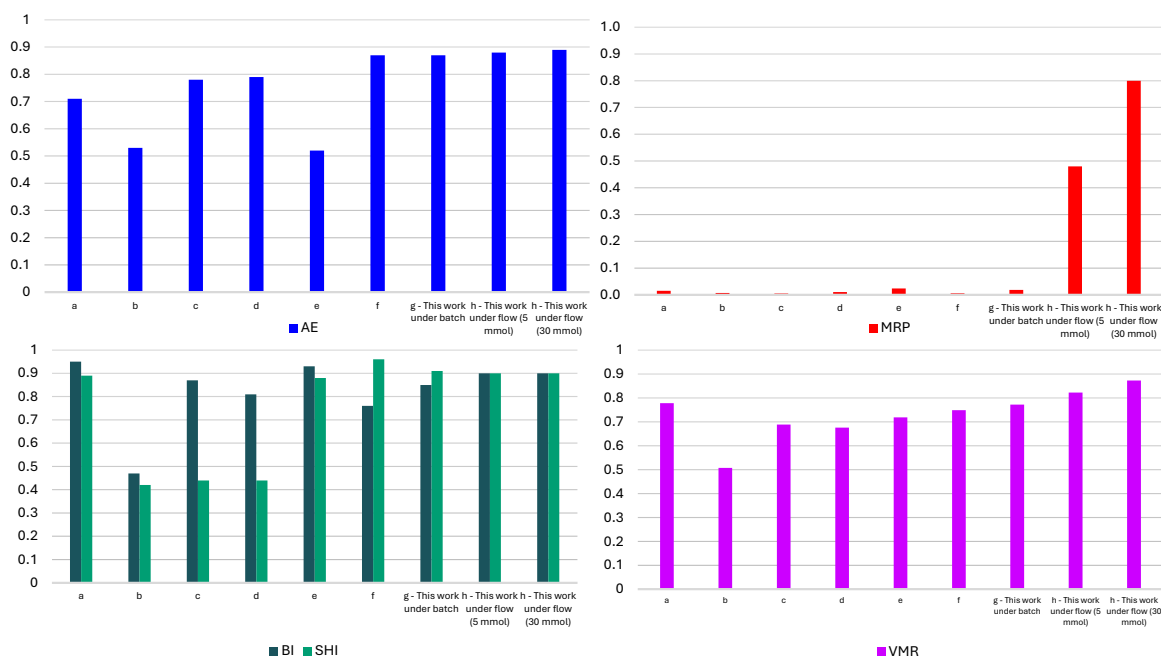

**Figure S14.** Histogram of the green metrics evaluated for the synthesis of a radial pentagon

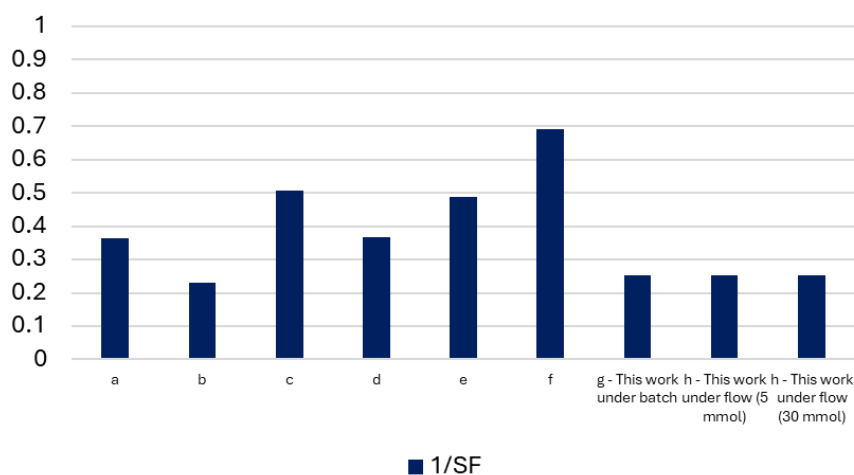

**Figure S15.** Histogram of the 1/SF

#### 4. References

1. J. Andraos *Org. Process Res. Dev.* 2013, **17**, 175–192.
2. J. Andraos *Org. Process Res. Dev.* 2012, **16**, 1482–1506.
3. John Andraos *ACS Sustainable Chem. Eng.* 2018, **6**, 3206–3214.
4. J. Andraos, E. Ballerini, L. Vaccaro. *Green Chem.*, 2015, **17**, 913-925
5. M.C. Harris, S.L. Buchwald *J. Org. Chem.* 2000, **65**, 5327–5333.
6. K. Wang, Z.-H. Deng, S.-J. Xie, D.-D. Zhai, H.-Y. Fang, Z.-J. Shi, *Nat. Commun.* 2021, **12**, 248
7. C. Sivarajan, S. Saha, S. Mulla, R. Mitra *J. Org. Chem.* 2024, **89**, 17021–17030.
8. S. Pang, Y. Zhang, Y. Huang, H. Yuan, F. Shi, *Catal. Sci. Technol.* 2017, **7** 2170–2182
9. Y.-H. Liu, C. Chen, L.-M. Yang *Tetrahedron Letter*, 2006, **47**, 9275.
10. S. Takayama, T. Yatabe, Y. Koizumi, X. Jin, K. Nozaki and K. Yamaguchi, *Chem. Sci.*, 2020, **11**, 4074–4084

## 5. Spectral characterization data

|                                                                                                                                                                                                                                                                                                                                                                                                                                                                                                                                                                                                                                                                                                                                                                                                                           |                                                                                                             |                                      |              |                   |           |
|---------------------------------------------------------------------------------------------------------------------------------------------------------------------------------------------------------------------------------------------------------------------------------------------------------------------------------------------------------------------------------------------------------------------------------------------------------------------------------------------------------------------------------------------------------------------------------------------------------------------------------------------------------------------------------------------------------------------------------------------------------------------------------------------------------------------------|-------------------------------------------------------------------------------------------------------------|--------------------------------------|--------------|-------------------|-----------|
| <b>Chem. Name</b>                                                                                                                                                                                                                                                                                                                                                                                                                                                                                                                                                                                                                                                                                                                                                                                                         | <b>tri-p-tolylamine (6a)</b>                                                                                |                                      |              |                   |           |
| <b>Lit. Ref.</b>                                                                                                                                                                                                                                                                                                                                                                                                                                                                                                                                                                                                                                                                                                                                                                                                          | T. Yamamoto, M. Nishiyama and Y. Koie, <i>J. Chem. Soc., Perkin Trans. 1</i> , 1998, <b>39</b> , 2367-2370. |                                      |              |                   |           |
| <p style="text-align: center;"> <chem>Nc1ccc(C)cc1</chem> (1a) + <chem>CC1CCC(CC1)C(=O)C</chem> (2a) <math>\xrightarrow[\text{1) air, 16 h; 2) O}_2, 6 \text{ h}]{\text{Pd/C (10 mol\%); p-TsOH (10 mol\%); CPME (1 M); 140}^\circ\text{C, reflux}}</math> <chem>Cc1ccc(N(c2ccc(C)cc2)c3ccc(C)cc3)cc1</chem> (6a)         </p>                                                                                                                                                                                                                                                                                                                                                                                                                                                                                            |                                                                                                             |                                      |              |                   |           |
| <b>METHOD:</b>                                                                                                                                                                                                                                                                                                                                                                                                                                                                                                                                                                                                                                                                                                                                                                                                            |                                                                                                             |                                      |              |                   |           |
| <p>In a 10 mL round-bottom flask equipped with a magnetic stirrer, Pd/C (10 mol%; 53 mg), TsOH (10 mol%; 8.6 mg), CPME (1 M; 0,5 mL), p-toluidina (<b>1a</b>) (0.5 mmol, 53 mg), and 4-methylcyclohexanone (<b>2a</b>) (5 mmol, 0.6 mL) were consecutively added. After 16 hours at 140°C in an open vessel under reflux, a balloon of O<sub>2</sub> was connected, and the reaction was stirred for an additional 6 hours at 140°C. The conversion was evaluated by gas chromatographic analysis. Pd/C was filtered off from the reaction mixture and washed with CPME (10 mL). The pure product was obtained after column chromatography using silica as the stationary phase and ETP as the eluent. After vacuum drying, the pure product tri-p-tolylamine (<b>6a</b>) was obtained with an isolated yield of 82%.</p> |                                                                                                             |                                      |              |                   |           |
| <b>Mol Formula</b>                                                                                                                                                                                                                                                                                                                                                                                                                                                                                                                                                                                                                                                                                                                                                                                                        |                                                                                                             | <b>C<sub>21</sub>H<sub>21</sub>N</b> |              | <b>m.p.</b>       | 116-118°C |
| <b><sup>1</sup>H NMR</b><br>400 MHz<br>CDCl <sub>3</sub>                                                                                                                                                                                                                                                                                                                                                                                                                                                                                                                                                                                                                                                                                                                                                                  | <b>δ value</b>                                                                                              | <b>No. H</b>                         | <b>Mult.</b> | <b>j value/Hz</b> |           |
|                                                                                                                                                                                                                                                                                                                                                                                                                                                                                                                                                                                                                                                                                                                                                                                                                           | 7.03                                                                                                        | 6                                    | <i>d</i>     | 8.1               |           |
|                                                                                                                                                                                                                                                                                                                                                                                                                                                                                                                                                                                                                                                                                                                                                                                                                           | 6.95                                                                                                        | 6                                    | <i>d</i>     | 8.2               |           |
|                                                                                                                                                                                                                                                                                                                                                                                                                                                                                                                                                                                                                                                                                                                                                                                                                           | 2.30                                                                                                        | 9                                    | <i>s</i>     |                   |           |
| <b><sup>13</sup>C NMR (100.6 MHz, CDCl<sub>3</sub>) δ:</b> 145.85; 131.89; 129.86; 124.00.                                                                                                                                                                                                                                                                                                                                                                                                                                                                                                                                                                                                                                                                                                                                |                                                                                                             |                                      |              |                   |           |
| <b>GC-EIMS (m/z, %):</b> 288 (79); 287 (100); 286 (52); 271 (25), 194 (15); 181 (18); 180 (27); 91 (15); 65 (18).                                                                                                                                                                                                                                                                                                                                                                                                                                                                                                                                                                                                                                                                                                         |                                                                                                             |                                      |              |                   |           |

|                                                                                                                                                                                                                                                                                                                                                                                                                                                                                                                                                                                                                                                                                                                                                                                                                                    |                                                                                                             |                                      |              |                   |         |
|------------------------------------------------------------------------------------------------------------------------------------------------------------------------------------------------------------------------------------------------------------------------------------------------------------------------------------------------------------------------------------------------------------------------------------------------------------------------------------------------------------------------------------------------------------------------------------------------------------------------------------------------------------------------------------------------------------------------------------------------------------------------------------------------------------------------------------|-------------------------------------------------------------------------------------------------------------|--------------------------------------|--------------|-------------------|---------|
| <b>Chem. Name</b>                                                                                                                                                                                                                                                                                                                                                                                                                                                                                                                                                                                                                                                                                                                                                                                                                  | <b>4-methyl-<i>N,N</i>-diphenylaniline (<b>6b</b>)</b>                                                      |                                      |              |                   |         |
| <b>Lit. Ref.</b>                                                                                                                                                                                                                                                                                                                                                                                                                                                                                                                                                                                                                                                                                                                                                                                                                   | T. Yamamoto, M. Nishiyama and Y. Koie, <i>J. Chem. Soc., Perkin Trans. 1</i> , 1998, <b>39</b> , 2367-2370. |                                      |              |                   |         |
| <p style="text-align: center;"> <chem>Cc1ccc(N)cc1</chem> (1a) + <chem>O=C1CCCCC1</chem> (2b) <math>\xrightarrow[\text{1) air, 16 h; 2) O}_2, 6 \text{ h}]{\text{Pd/C (10 mol\%); p-TsOH (10 mol\%); CPME (1 M); 140}^\circ\text{C, reflux}}</math> <chem>Cc1ccc(N(c2ccccc2)c3ccccc13)cc1</chem> (6b) </p>                                                                                                                                                                                                                                                                                                                                                                                                                                                                                                                         |                                                                                                             |                                      |              |                   |         |
| <b>METHOD:</b>                                                                                                                                                                                                                                                                                                                                                                                                                                                                                                                                                                                                                                                                                                                                                                                                                     |                                                                                                             |                                      |              |                   |         |
| <p>In a 10 mL round-bottom flask equipped with a magnetic stirrer, Pd/C (10 mol%; 53 mg), TsOH (10 mol%; 8.6 mg), CPME (1 M; 0,5 mL), p-toluidina (<b>1a</b>) (0.5 mmol, 53 mg), and cyclohexanone (<b>2b</b>) (5 mmol, 0.5 mL) were consecutively added. After 16 hours at 140°C in an open vessel under reflux, a balloon of O<sub>2</sub> was connected, and the reaction was stirred for an additional 6 hours at 140°C. The conversion was evaluated by gas chromatographic analysis. Pd/C was filtered off from the reaction mixture and washed with CPME (10 mL). The pure product was obtained after column chromatography using silica as the stationary phase and ETP as the eluent. After vacuum drying, the pure product 4-methyl-<i>N,N</i>-diphenylamina (<b>6b</b>) was obtained with an isolated yield of 59%.</p> |                                                                                                             |                                      |              |                   |         |
| <b>Mol Formula</b>                                                                                                                                                                                                                                                                                                                                                                                                                                                                                                                                                                                                                                                                                                                                                                                                                 |                                                                                                             | <b>C<sub>19</sub>H<sub>17</sub>N</b> |              | <b>m.p.</b>       | 66-69°C |
| <b><sup>1</sup>H NMR</b><br>400 MHz<br>CDCl <sub>3</sub>                                                                                                                                                                                                                                                                                                                                                                                                                                                                                                                                                                                                                                                                                                                                                                           | <b>δ value</b>                                                                                              | <b>No. H</b>                         | <b>Mult.</b> | <b>j value/Hz</b> |         |
|                                                                                                                                                                                                                                                                                                                                                                                                                                                                                                                                                                                                                                                                                                                                                                                                                                    | 7.22                                                                                                        | 4                                    | <i>t</i>     | 7.9               |         |
|                                                                                                                                                                                                                                                                                                                                                                                                                                                                                                                                                                                                                                                                                                                                                                                                                                    | 7.09-7.05                                                                                                   | 6                                    | <i>m</i>     |                   |         |
|                                                                                                                                                                                                                                                                                                                                                                                                                                                                                                                                                                                                                                                                                                                                                                                                                                    | 7.02-6.95                                                                                                   | 4                                    | <i>m</i>     |                   |         |
|                                                                                                                                                                                                                                                                                                                                                                                                                                                                                                                                                                                                                                                                                                                                                                                                                                    | 2.31                                                                                                        | 3                                    | <i>s</i>     |                   |         |
| <b><sup>13</sup>C NMR (100.6 MHz, CDCl<sub>3</sub>) δ:</b> 148.18; 145.39; 132.88; 130.05; 129.24; 125.08; 123.74; 122.35; 20.97.                                                                                                                                                                                                                                                                                                                                                                                                                                                                                                                                                                                                                                                                                                  |                                                                                                             |                                      |              |                   |         |
| <b>GC-EIMS (m/z, %):</b> 261 (22); 260 (100); 259 (100); 258 (100); 257 (26); 256 (24); 243 (100); 242 (40); 241 (29); 182 (15); 181 (23); 180 (61); 168 (31); 167 (100); 166 (72); 165 (15); 156 (27); 155 (22); 153 (22); 152 (24); 142 (23); 141 (48); 140 (18); 139 (19); 130 (39); 129 (47); 127 (23); 121 (18); 121 (23).                                                                                                                                                                                                                                                                                                                                                                                                                                                                                                    |                                                                                                             |                                      |              |                   |         |



|                                                                                                                                                                                                                                                                                                                                                                                                                                                                                                                                                                                                                                                                                                                                                                                                                                                          |                                                                                                               |                                   |              |
|----------------------------------------------------------------------------------------------------------------------------------------------------------------------------------------------------------------------------------------------------------------------------------------------------------------------------------------------------------------------------------------------------------------------------------------------------------------------------------------------------------------------------------------------------------------------------------------------------------------------------------------------------------------------------------------------------------------------------------------------------------------------------------------------------------------------------------------------------------|---------------------------------------------------------------------------------------------------------------|-----------------------------------|--------------|
| <b>Chem. Name</b>                                                                                                                                                                                                                                                                                                                                                                                                                                                                                                                                                                                                                                                                                                                                                                                                                                        | <b>4-methyl-N-phenyl-N-(p-tolyl)aniline (6d)</b>                                                              |                                   |              |
| <b>Lit. Ref.</b>                                                                                                                                                                                                                                                                                                                                                                                                                                                                                                                                                                                                                                                                                                                                                                                                                                         | Sachin G. Modha, Mihai V. Popescu and Michael F. Greaney, <i>J. Org. Chem.</i> 2017, <b>82</b> , 11933-11938. |                                   |              |
| <p style="text-align: center;"> <chem>Nc1ccccc1</chem> (1b) + <chem>CC1CCCCC1=O</chem> (2a) <math>\xrightarrow[\text{1) air, 16 h; 2) O}_2, 6 \text{ h}]{\text{Pd/C (10 mol\%); p-TsOH (10 mol\%); CPME (1 M); 140}^\circ\text{C, reflux}}</math> <chem>Cc1ccc(cc1)N(c2ccccc2)c3ccc(C)cc3</chem> (6d) </p>                                                                                                                                                                                                                                                                                                                                                                                                                                                                                                                                               |                                                                                                               |                                   |              |
| <b>METHOD:</b>                                                                                                                                                                                                                                                                                                                                                                                                                                                                                                                                                                                                                                                                                                                                                                                                                                           |                                                                                                               |                                   |              |
| <p>In a 10 mL round-bottom flask equipped with a magnetic stirrer, Pd/C (10 mol%; 53 mg), TsOH (10 mol%; 8.6 mg), CPME (1 M; 0,5 mL), aniline (<b>1b</b>) (0.5 mmol, 46 <math>\mu</math>L), and 4-methylcyclohexanone (<b>2c</b>) (5 mmol, 0.6 mL) were consecutively added. After 16 hours at 140°C in an open vessel under reflux, a balloon of O<sub>2</sub> was connected, and the reaction was stirred for an additional 6 hours at 140°C. The conversion was evaluated by gas chromatographic analysis. Pd/C was filtered off from the reaction mixture and washed with CPME (10 mL). The pure product was obtained after column chromatography using silica as the stationary phase and ETP as the eluent. After vacuum drying, the pure product 4-methyl-N-phenyl-N-(p-tolyl)aniline (<b>6d</b>) was obtained with an isolated yield of 75%.</p> |                                                                                                               |                                   |              |
| <b>Mol Formula</b>                                                                                                                                                                                                                                                                                                                                                                                                                                                                                                                                                                                                                                                                                                                                                                                                                                       |                                                                                                               | C <sub>20</sub> H <sub>19</sub> N |              |
|                                                                                                                                                                                                                                                                                                                                                                                                                                                                                                                                                                                                                                                                                                                                                                                                                                                          |                                                                                                               | <b>m.p.</b>                       | 111-113°C    |
| <b><sup>1</sup>H NMR</b><br>400 MHz<br>CDCl <sub>3</sub>                                                                                                                                                                                                                                                                                                                                                                                                                                                                                                                                                                                                                                                                                                                                                                                                 | <b><math>\delta</math> value</b>                                                                              | <b>No. H</b>                      | <b>Mult.</b> |
|                                                                                                                                                                                                                                                                                                                                                                                                                                                                                                                                                                                                                                                                                                                                                                                                                                                          | 7.20                                                                                                          | 2                                 | <i>t</i>     |
|                                                                                                                                                                                                                                                                                                                                                                                                                                                                                                                                                                                                                                                                                                                                                                                                                                                          | 7.06-6.97                                                                                                     | 10                                | <i>m</i>     |
|                                                                                                                                                                                                                                                                                                                                                                                                                                                                                                                                                                                                                                                                                                                                                                                                                                                          | 6.93                                                                                                          | 1                                 | <i>t</i>     |
|                                                                                                                                                                                                                                                                                                                                                                                                                                                                                                                                                                                                                                                                                                                                                                                                                                                          | 2.31                                                                                                          | 6                                 | <i>s</i>     |
| <b><sup>13</sup>C NMR (100.6 MHz, CDCl<sub>3</sub>) <math>\delta</math>:</b> 148.41; 145.59; 132.43; 129.96; 129.15; 124.59; 123.08; 121.83; 20.93.                                                                                                                                                                                                                                                                                                                                                                                                                                                                                                                                                                                                                                                                                                      |                                                                                                               |                                   |              |
| <b>GC-EIMS (m/z, %):</b> 275 (25); 273 (100); 258 (63); 257 (97); 256 (46); 254 (17); 243 (30); 241 (15); 194 (18); 182 (15); 181 (29); 180 (60); 167 (47); 166 (24); 156 (17); 155 (21); 154 (16); 153 (17); 152 (15); 141 (15); 137 (34); 135 (20); 128 (29); 127 (22); 115 (17); 91 (21); 77 (19).                                                                                                                                                                                                                                                                                                                                                                                                                                                                                                                                                    |                                                                                                               |                                   |              |

|                                                                                                                                                                                                                                                                                                                                                                                                                                                                                                                                                                                                                                                                                                                                                                                                                            |                                                                                                             |                                   |              |                   |           |
|----------------------------------------------------------------------------------------------------------------------------------------------------------------------------------------------------------------------------------------------------------------------------------------------------------------------------------------------------------------------------------------------------------------------------------------------------------------------------------------------------------------------------------------------------------------------------------------------------------------------------------------------------------------------------------------------------------------------------------------------------------------------------------------------------------------------------|-------------------------------------------------------------------------------------------------------------|-----------------------------------|--------------|-------------------|-----------|
| <b>Chem. Name</b>                                                                                                                                                                                                                                                                                                                                                                                                                                                                                                                                                                                                                                                                                                                                                                                                          | <b>Triphenylamine (6e)</b>                                                                                  |                                   |              |                   |           |
| <b>Lit. Ref.</b>                                                                                                                                                                                                                                                                                                                                                                                                                                                                                                                                                                                                                                                                                                                                                                                                           | T. Yamamoto, M. Nishiyama and Y. Koie, <i>J. Chem. Soc., Perkin Trans. 1</i> , 1998, <b>39</b> , 2367-2370. |                                   |              |                   |           |
| <p style="text-align: center;"> <chem>Nc1ccccc1</chem> (1b) + <chem>O=C1CCCCC1</chem> (2b) <math>\xrightarrow[\text{1) air, 16 h; 2) O}_2, 6 \text{ h}]{\text{Pd/C (10 mol\%); p-TsOH (10 mol\%); CPME (1 M); 140}^\circ\text{C, reflux}}</math> <chem>c1ccc(cc1)N(c2ccccc2)c3ccccc3</chem> (6e) </p>                                                                                                                                                                                                                                                                                                                                                                                                                                                                                                                      |                                                                                                             |                                   |              |                   |           |
| <b>METHOD:</b>                                                                                                                                                                                                                                                                                                                                                                                                                                                                                                                                                                                                                                                                                                                                                                                                             |                                                                                                             |                                   |              |                   |           |
| <p>In a 10 mL round-bottom flask equipped with a magnetic stirrer, Pd/C (10 mol%; 53 mg), TsOH (10 mol%; 8.6 mg), CPME (1 M; 0,5 mL), aniline (<b>1b</b>) (0.5 mmol, 46 <math>\mu</math>L), and cyclohexanone (<b>2b</b>) (5 mmol, 0.5 mL) were consecutively added. After 16 hours at 140°C in an open vessel under reflux, a balloon of O<sub>2</sub> was connected, and the reaction was stirred for an additional 6 hours at 140°C. The conversion was evaluated by gas chromatographic analysis. Pd/C was filtered off from the reaction mixture and washed with CPME (10 mL). The pure product was obtained after column chromatography using silica as the stationary phase and ETP as the eluent. After vacuum drying, the pure product triphenylamine (<b>6e</b>) was obtained with an isolated yield of 63%.</p> |                                                                                                             |                                   |              |                   |           |
| <b>Mol Formula</b>                                                                                                                                                                                                                                                                                                                                                                                                                                                                                                                                                                                                                                                                                                                                                                                                         |                                                                                                             | C <sub>18</sub> H <sub>15</sub> N |              | <b>m.p.</b>       | 126-128°C |
| <b><sup>1</sup>H NMR</b><br>400 MHz<br>CDCl <sub>3</sub>                                                                                                                                                                                                                                                                                                                                                                                                                                                                                                                                                                                                                                                                                                                                                                   | <b><math>\delta</math> value</b>                                                                            | <b>No. H</b>                      | <b>Mult.</b> | <b>j value/Hz</b> |           |
|                                                                                                                                                                                                                                                                                                                                                                                                                                                                                                                                                                                                                                                                                                                                                                                                                            | 7.23                                                                                                        | 6                                 | <i>d</i>     | 7.6               |           |
|                                                                                                                                                                                                                                                                                                                                                                                                                                                                                                                                                                                                                                                                                                                                                                                                                            | 7.09                                                                                                        | 6                                 | <i>d</i>     | 7.9               |           |
|                                                                                                                                                                                                                                                                                                                                                                                                                                                                                                                                                                                                                                                                                                                                                                                                                            | 7.00                                                                                                        | 3                                 | <i>t</i>     | 7.2               |           |
| <b><sup>13</sup>C NMR (100.6 MHz, CDCl<sub>3</sub>) <math>\delta</math>:</b> 148.00; 129.33; 124.30; 122.80.                                                                                                                                                                                                                                                                                                                                                                                                                                                                                                                                                                                                                                                                                                               |                                                                                                             |                                   |              |                   |           |
| <b>GC-EIMS (m/z, %):</b> 247 (21); 246 (100); 245 (39); 168 (15).                                                                                                                                                                                                                                                                                                                                                                                                                                                                                                                                                                                                                                                                                                                                                          |                                                                                                             |                                   |              |                   |           |

|                                                                                                                                                                                                                                                                                                                                                                                                                                                                                                                                                                                                                                                                                                                                                                                                                                                           |                                                          |                                      |              |                   |           |
|-----------------------------------------------------------------------------------------------------------------------------------------------------------------------------------------------------------------------------------------------------------------------------------------------------------------------------------------------------------------------------------------------------------------------------------------------------------------------------------------------------------------------------------------------------------------------------------------------------------------------------------------------------------------------------------------------------------------------------------------------------------------------------------------------------------------------------------------------------------|----------------------------------------------------------|--------------------------------------|--------------|-------------------|-----------|
| <b>Chem. Name</b>                                                                                                                                                                                                                                                                                                                                                                                                                                                                                                                                                                                                                                                                                                                                                                                                                                         | <b>3-methyl-<i>N,N</i>-di-<i>p</i>-tolylaniline (6f)</b> |                                      |              |                   |           |
| <b>Lit. Ref.</b>                                                                                                                                                                                                                                                                                                                                                                                                                                                                                                                                                                                                                                                                                                                                                                                                                                          |                                                          |                                      |              |                   |           |
| <p style="text-align: center;"> <chem>Cc1ccc(N)cc1</chem> + <chem>Cc1ccc(cc1)C(=O)C2CCCCC2</chem> <br/> <b>1c</b>                      <b>2a</b> </p> <p style="text-align: center;"> <b>Pd/C (10 mol%)</b><br/> <b>p-TsOH (10 mol%)</b><br/> <b>CPME (1 M)</b> </p> <p style="text-align: center;"> <b>140°C, reflux</b><br/> <b>1) air, 16 h</b><br/> <b>2) O<sub>2</sub>, 6 h</b> </p> <p style="text-align: center;"> <chem>Cc1ccc(cc1)N(c2ccc(C)cc2)c3ccc(C)cc3</chem> <br/> <b>6f</b> </p>                                                                                                                                                                                                                                                                                                                                                          |                                                          |                                      |              |                   |           |
| <b>METHOD:</b>                                                                                                                                                                                                                                                                                                                                                                                                                                                                                                                                                                                                                                                                                                                                                                                                                                            |                                                          |                                      |              |                   |           |
| <p>In a 10 mL round-bottom flask equipped with a magnetic stirrer, Pd/C (10 mol%; 53 mg), TsOH (10 mol%; 8.6 mg), CPME (1 M; 0,5 mL), 3-methylaniline (<b>1c</b>) (0.5 mmol, 54 μL), and 4-methylcyclohexanone (<b>2a</b>) (5 mmol, 0.6 mL) were consecutively added. After 16 hours at 140°C in an open vessel under reflux, a balloon of O<sub>2</sub> was connected, and the reaction was stirred for an additional 6 hours at 140°C. The conversion was evaluated by gas chromatographic analysis. Pd/C was filtered off from the reaction mixture and washed with CPME (10 mL). The pure product was obtained after column chromatography using silica as the stationary phase and ETP as the eluent. After vacuum drying, the pure product 3-methyl-<i>N,N</i>-di-<i>p</i>-tolylaniline (<b>6f</b>) was obtained with an isolated yield of 69%.</p> |                                                          |                                      |              |                   |           |
| <b>Mol Formula</b>                                                                                                                                                                                                                                                                                                                                                                                                                                                                                                                                                                                                                                                                                                                                                                                                                                        |                                                          | <b>C<sub>21</sub>H<sub>21</sub>N</b> |              | <b>m.p.</b>       | 198-200°C |
| <b><sup>1</sup>H NMR</b><br><b>400 MHz</b><br><b>CDCl<sub>3</sub></b>                                                                                                                                                                                                                                                                                                                                                                                                                                                                                                                                                                                                                                                                                                                                                                                     | <b>δ value</b>                                           | <b>No. H</b>                         | <b>Mult.</b> | <b>j value/Hz</b> |           |
|                                                                                                                                                                                                                                                                                                                                                                                                                                                                                                                                                                                                                                                                                                                                                                                                                                                           | 7.09                                                     | 1                                    | <i>t</i>     | 7.5               |           |
|                                                                                                                                                                                                                                                                                                                                                                                                                                                                                                                                                                                                                                                                                                                                                                                                                                                           | 7.05                                                     | 4                                    | <i>d</i>     | 7.8               |           |
|                                                                                                                                                                                                                                                                                                                                                                                                                                                                                                                                                                                                                                                                                                                                                                                                                                                           | 6.97                                                     | 4                                    | <i>d</i>     | 7.8               |           |
|                                                                                                                                                                                                                                                                                                                                                                                                                                                                                                                                                                                                                                                                                                                                                                                                                                                           | 6.87                                                     | 1                                    | <i>s</i>     |                   |           |
|                                                                                                                                                                                                                                                                                                                                                                                                                                                                                                                                                                                                                                                                                                                                                                                                                                                           | 6.82                                                     | 1                                    | <i>d</i>     | 7.8               |           |
|                                                                                                                                                                                                                                                                                                                                                                                                                                                                                                                                                                                                                                                                                                                                                                                                                                                           | 6.76                                                     | 1                                    | <i>d</i>     | 7.4               |           |
|                                                                                                                                                                                                                                                                                                                                                                                                                                                                                                                                                                                                                                                                                                                                                                                                                                                           | 2.31                                                     | 6                                    | <i>s</i>     |                   |           |
|                                                                                                                                                                                                                                                                                                                                                                                                                                                                                                                                                                                                                                                                                                                                                                                                                                                           | 2.24                                                     | 3                                    | <i>s</i>     |                   |           |
| <b><sup>13</sup>C NMR (100.6 MHz, CDCl<sub>3</sub>) δ:</b> 148.34; 145.71; 138.98; 132.23; 129.90; 128.97; 124.51; 123.91; 122.87; 120.51; 31.06; 20.92.                                                                                                                                                                                                                                                                                                                                                                                                                                                                                                                                                                                                                                                                                                  |                                                          |                                      |              |                   |           |
| <b>GC-EIMS (m/z, %):</b> 329 (28); 320 (50); 287 (78); 200 (23); 158 (30)                                                                                                                                                                                                                                                                                                                                                                                                                                                                                                                                                                                                                                                                                                                                                                                 |                                                          |                                      |              |                   |           |

|                                                                                                                                                                                                                                                                                                                                                                                                                                                                                                                                                                                                                                                                                                                                                                                                                                                                                  |                                                              |                                      |              |                   |         |
|----------------------------------------------------------------------------------------------------------------------------------------------------------------------------------------------------------------------------------------------------------------------------------------------------------------------------------------------------------------------------------------------------------------------------------------------------------------------------------------------------------------------------------------------------------------------------------------------------------------------------------------------------------------------------------------------------------------------------------------------------------------------------------------------------------------------------------------------------------------------------------|--------------------------------------------------------------|--------------------------------------|--------------|-------------------|---------|
| <b>Chem. Name</b>                                                                                                                                                                                                                                                                                                                                                                                                                                                                                                                                                                                                                                                                                                                                                                                                                                                                | <b>3,5-dimethyl-<i>N,N</i>-di-<i>p</i>-tolylaniline (6g)</b> |                                      |              |                   |         |
| <b>Lit. Ref.</b>                                                                                                                                                                                                                                                                                                                                                                                                                                                                                                                                                                                                                                                                                                                                                                                                                                                                 |                                                              |                                      |              |                   |         |
| <p style="text-align: center;"> <chem>Cc1ccc(N)cc1</chem> (1d) + <chem>Cc1ccc(cc1)C(=O)C2CCCCC2</chem> (2a)       <br/> <math>\xrightarrow[\text{1) air, 16 h; 2) O}_2, 6 \text{ h}]{\text{Pd/C (10 mol\%); p-TsOH (10 mol\%); CPME (1 M); 140}^\circ\text{C, reflux}}</math> <br/> <chem>Cc1ccc(cc1)N(c2ccc(C)cc2)c3cc(C)cc(C)c3</chem> (6g)     </p>                                                                                                                                                                                                                                                                                                                                                                                                                                                                                                                           |                                                              |                                      |              |                   |         |
| <b>METHOD:</b>                                                                                                                                                                                                                                                                                                                                                                                                                                                                                                                                                                                                                                                                                                                                                                                                                                                                   |                                                              |                                      |              |                   |         |
| <p>In a 10 mL round-bottom flask equipped with a magnetic stirrer, Pd/C (10 mol%; 53 mg), TsOH (10 mol%; 8.6 mg), CPME (1 M; 0,5 mL), 3,5-dimethylaniline (<b>1d</b>) (0.5 mmol, 62 <math>\mu</math>L), and 4-methylcyclohexanone (<b>2a</b>) (5 mmol, 0.6 mL) were consecutively added. After 16 hours at 140°C in an open vessel under reflux, a balloon of O<sub>2</sub> was connected, and the reaction was stirred for an additional 6 hours at 140°C. The conversion was evaluated by gas chromatographic analysis. Pd/C was filtered off from the reaction mixture and washed with CPME (10 mL). The pure product was obtained after column chromatography using silica as the stationary phase and ETP as the eluent. After vacuum drying, the pure product 3,5-dimethyl-<i>N,N</i>-di-<i>p</i>-tolylaniline (<b>6g</b>) was obtained with an isolated yield of 66%.</p> |                                                              |                                      |              |                   |         |
| <b>Mol Formula</b>                                                                                                                                                                                                                                                                                                                                                                                                                                                                                                                                                                                                                                                                                                                                                                                                                                                               |                                                              | <b>C<sub>22</sub>H<sub>23</sub>N</b> |              | <b>m.p.</b>       | 93-96°C |
| <b><sup>1</sup>H NMR</b><br><b>400 MHz</b><br><b>CDCl<sub>3</sub></b>                                                                                                                                                                                                                                                                                                                                                                                                                                                                                                                                                                                                                                                                                                                                                                                                            | <b><math>\delta</math> value</b>                             | <b>No. H</b>                         | <b>Mult.</b> | <b>j value/Hz</b> |         |
|                                                                                                                                                                                                                                                                                                                                                                                                                                                                                                                                                                                                                                                                                                                                                                                                                                                                                  | 7.04                                                         | 4                                    | <i>d</i>     | 8.2               |         |
|                                                                                                                                                                                                                                                                                                                                                                                                                                                                                                                                                                                                                                                                                                                                                                                                                                                                                  | 6.96                                                         | 4                                    | <i>d</i>     | 8.2               |         |
|                                                                                                                                                                                                                                                                                                                                                                                                                                                                                                                                                                                                                                                                                                                                                                                                                                                                                  | 6.67                                                         | 2                                    | <i>s</i>     |                   |         |
|                                                                                                                                                                                                                                                                                                                                                                                                                                                                                                                                                                                                                                                                                                                                                                                                                                                                                  | 6.61                                                         | 1                                    | <i>s</i>     |                   |         |
|                                                                                                                                                                                                                                                                                                                                                                                                                                                                                                                                                                                                                                                                                                                                                                                                                                                                                  | 2.31                                                         | 6                                    | <i>s</i>     |                   |         |
|                                                                                                                                                                                                                                                                                                                                                                                                                                                                                                                                                                                                                                                                                                                                                                                                                                                                                  | 2.20                                                         | 6                                    | <i>s</i>     |                   |         |
| <b><sup>13</sup>C NMR (100.6 MHz, CDCl<sub>3</sub>) <math>\delta</math>:</b> 148.27; 145.80; 138.78; 132.06; 129.87; 124.45; 124.02; 121.30; 21.46; 20.94.                                                                                                                                                                                                                                                                                                                                                                                                                                                                                                                                                                                                                                                                                                                       |                                                              |                                      |              |                   |         |
| <b>GC-EIMS (m/z, %):</b> 303 (29); 302 (40); 301 (100); 300 (32); 287 (20); 286 (38); 285 (58); 284 (44); 281 (20); 272 (22); 271 (24); 270 (20); 208 (22); 207 (41); 195 (29); 194 (46); 193 (16); 181 (22); 180 (29); 169 (24); 165 (16); 77 (25); 73 (23); 65 (24); 28 (38).                                                                                                                                                                                                                                                                                                                                                                                                                                                                                                                                                                                                  |                                                              |                                      |              |                   |         |

|                                                                                                                                                                                                                                                                                                                                                                                                                                                                                                                                                                                                                                                                                                                                                                                                                                                                                  |                                                             |                                      |              |                   |            |
|----------------------------------------------------------------------------------------------------------------------------------------------------------------------------------------------------------------------------------------------------------------------------------------------------------------------------------------------------------------------------------------------------------------------------------------------------------------------------------------------------------------------------------------------------------------------------------------------------------------------------------------------------------------------------------------------------------------------------------------------------------------------------------------------------------------------------------------------------------------------------------|-------------------------------------------------------------|--------------------------------------|--------------|-------------------|------------|
| <b>Chem. Name</b>                                                                                                                                                                                                                                                                                                                                                                                                                                                                                                                                                                                                                                                                                                                                                                                                                                                                | <b>4-isopropyl-<i>N,N</i>-di-<i>p</i>-tolylaniline (6h)</b> |                                      |              |                   |            |
| <b>Lit. Ref.</b>                                                                                                                                                                                                                                                                                                                                                                                                                                                                                                                                                                                                                                                                                                                                                                                                                                                                 |                                                             |                                      |              |                   |            |
| <p style="text-align: center;"> <chem>CC(C)c1ccc(N)cc1</chem> + <chem>CC1CCCCC1=O</chem> <br/> <math>\xrightarrow[\text{1) air, 24 h; 2) O}_2, 24 \text{ h}]{\text{Pd/C (10 mol\%); p-TsOH (10 mol\%); CPME (1 M); 140}^\circ\text{C, reflux}}</math> <chem>CC(C)c1ccc(N(c2ccc(C)cc2)c3ccc(C)cc3)cc1</chem> </p>                                                                                                                                                                                                                                                                                                                                                                                                                                                                                                                                                                 |                                                             |                                      |              |                   |            |
| <b>METHOD:</b>                                                                                                                                                                                                                                                                                                                                                                                                                                                                                                                                                                                                                                                                                                                                                                                                                                                                   |                                                             |                                      |              |                   |            |
| <p>In a 10 mL round-bottom flask equipped with a magnetic stirrer, Pd/C (10 mol%; 53 mg), TsOH (10 mol%; 8.6 mg), CPME (1 M; 0,5 mL), 4-isopropyl-aniline (<b>1e</b>) (0.5 mmol, 70 <math>\mu</math>L), and 4-methylcyclohexanone (<b>2a</b>) (5 mmol, 0.6 mL) were consecutively added. After 24 hours at 140°C in an open vessel under reflux, a balloon of O<sub>2</sub> was connected, and the reaction was stirred for an additional 24 hours at 140°C. The conversion was evaluated by gas chromatographic analysis. Pd/C was filtered off from the reaction mixture and washed with CPME (10 mL). The pure product was obtained after column chromatography using silica as the stationary phase and ETP as the eluent. After vacuum drying, the pure product 4-isopropyl-<i>N,N</i>-di-<i>p</i>-tolylaniline (<b>6h</b>) was obtained with an isolated yield of 85%.</p> |                                                             |                                      |              |                   |            |
| <b>Mol Formula</b>                                                                                                                                                                                                                                                                                                                                                                                                                                                                                                                                                                                                                                                                                                                                                                                                                                                               |                                                             | <b>C<sub>23</sub>H<sub>25</sub>N</b> |              | <b>m.p.</b>       | <b>Oil</b> |
| <b><sup>1</sup>H NMR</b><br><b>400 MHz</b><br><b>CDCl<sub>3</sub></b>                                                                                                                                                                                                                                                                                                                                                                                                                                                                                                                                                                                                                                                                                                                                                                                                            | <b><math>\delta</math> value</b>                            | <b>No. H</b>                         | <b>Mult.</b> | <b>j value/Hz</b> |            |
|                                                                                                                                                                                                                                                                                                                                                                                                                                                                                                                                                                                                                                                                                                                                                                                                                                                                                  | 7.10                                                        | 2                                    | <i>d</i>     | 8.5               |            |
|                                                                                                                                                                                                                                                                                                                                                                                                                                                                                                                                                                                                                                                                                                                                                                                                                                                                                  | 7.08-7.06                                                   | 4                                    | <i>d</i>     | 8.4               |            |
|                                                                                                                                                                                                                                                                                                                                                                                                                                                                                                                                                                                                                                                                                                                                                                                                                                                                                  | 6.98                                                        | 6                                    | <i>d</i>     | 8.6               |            |
|                                                                                                                                                                                                                                                                                                                                                                                                                                                                                                                                                                                                                                                                                                                                                                                                                                                                                  | 2.90                                                        | 1                                    | <i>ept</i>   | 6.9               |            |
|                                                                                                                                                                                                                                                                                                                                                                                                                                                                                                                                                                                                                                                                                                                                                                                                                                                                                  | 2.32                                                        | 6                                    | <i>s</i>     |                   |            |
|                                                                                                                                                                                                                                                                                                                                                                                                                                                                                                                                                                                                                                                                                                                                                                                                                                                                                  | 1.26                                                        | 6                                    | <i>d</i>     | 6.9               |            |
| <b><sup>13</sup>C NMR (100.6 MHz, CDCl<sub>3</sub>) <math>\delta</math>: 145.97; 145.83; 142.75; 131.93; 129.86; 127.10; 124.15; 123.56; 33.55; 24.21; 20.91.</b>                                                                                                                                                                                                                                                                                                                                                                                                                                                                                                                                                                                                                                                                                                                |                                                             |                                      |              |                   |            |
| <b>GC-EIMS (m/z, %): 316 (17); 315 (100); 301 (16); 300 (94); 192 (15); 190 (16); 180 (18); 92 (16); 91 (28); 65 (21).</b>                                                                                                                                                                                                                                                                                                                                                                                                                                                                                                                                                                                                                                                                                                                                                       |                                                             |                                      |              |                   |            |

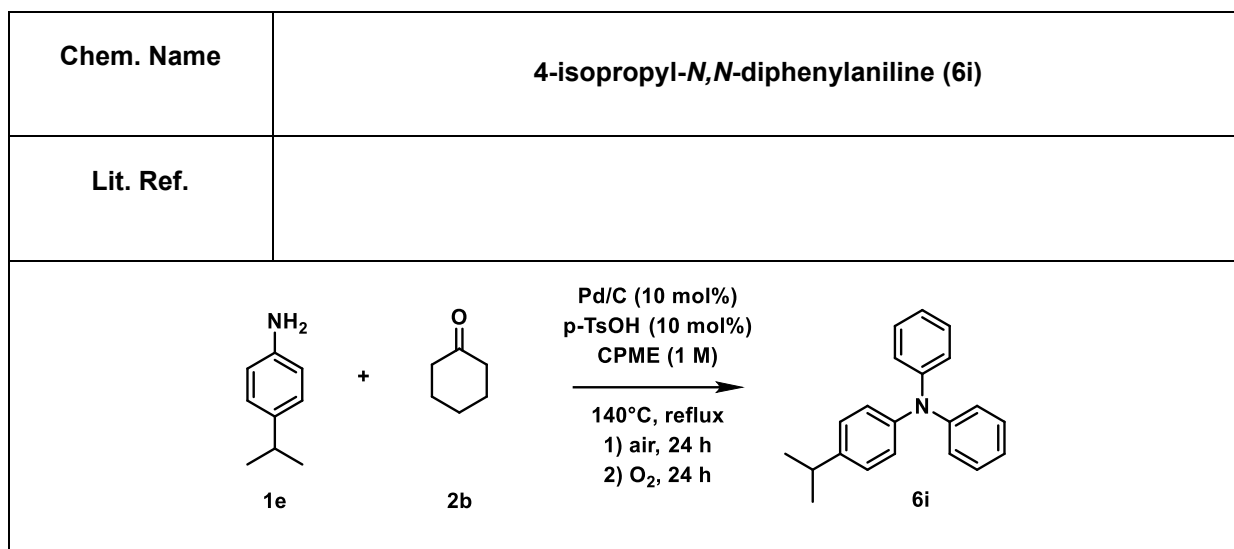

**METHOD:**

In a 10 mL round-bottom flask equipped with a magnetic stirrer, Pd/C (10 mol%; 53 mg), TsOH (10 mol%; 8.6 mg), CPME (1 M; 0.5 mL), 4-isopropyl-aniline (**1e**) (0.5 mmol, 70  $\mu$ L), and cyclohexanone (**2b**) (5 mmol, 0.5 mL) were consecutively added. After 24 hours at 140°C in an open vessel under reflux, a balloon of O<sub>2</sub> was connected, and the reaction was stirred for an additional 24 hours at 140°C. The conversion was evaluated by gas chromatographic analysis. Pd/C was filtered off from the reaction mixture and washed with CPME (10 mL). The pure product was obtained after column chromatography using silica as the stationary phase and ETP as the eluent. After vacuum drying, the pure product 4-isopropyl-*N,N*-diphenylaniline (**6i**) was obtained with an isolated yield of 87%.

| Mol Formula                                              |                                  | C <sub>21</sub> H <sub>21</sub> N |              | m.p.              | Oil |
|----------------------------------------------------------|----------------------------------|-----------------------------------|--------------|-------------------|-----|
| <b><sup>1</sup>H NMR</b><br>400 MHz<br>CDCl <sub>3</sub> | <b><math>\delta</math> value</b> | <b>No. H</b>                      | <b>Mult.</b> | <b>j value/Hz</b> |     |
|                                                          | 7.23                             | 4                                 | <i>t</i>     | 8.5               |     |
|                                                          | 7.12-7.06                        | 6                                 | <i>m</i>     |                   |     |
|                                                          | 7.03-6.96                        | 4                                 | <i>m</i>     |                   |     |
|                                                          | 2.91-2.84                        | 1                                 | <i>ept</i>   | 6.9               |     |
|                                                          | 1.25                             | 6                                 | <i>d</i>     | 6.9               |     |

**<sup>13</sup>C NMR (100.6 MHz, CDCl<sub>3</sub>)  $\delta$ :** 148.19; 145.52; 143.76; 129.24; 127.30; 124.73; 123.88; 122.39; 33.62; 24.19.

**GC-EIMS (m/z, %):** 289 (31); 288 (100); 287 (100); 286 (25); 274 (43); 273 (100); 272 (100); 271 (50); 270 (52); 257 (23); 256 (71); 254 (28); 245 (32); 244 (88); 243 (71); 242 (42); 241 (33); 195 (24); 194 (53); 193 (47); 192 (32); 191 (19); 180 (49); 179 (22); 178 (20); 169 (21); 168 (100); 167 (100); 166 (65); 165 (33); 154 (18); 153 (26); 152 (30); 141 (37); 140 (18); 139 (21); 136 (58); 128 (48); 127 (28); 121 (16); 115 (40); 103 (20); 92 (18); 91 (47); 78 (22); 77 (83); 65 (16); 51 (34).

|                                                                                                                                                                                                                                                                                                                                                                                                                                                                                                                                                                                                                                                                                                                                                                                                                                                                        |                                                  |                                   |              |                   |         |
|------------------------------------------------------------------------------------------------------------------------------------------------------------------------------------------------------------------------------------------------------------------------------------------------------------------------------------------------------------------------------------------------------------------------------------------------------------------------------------------------------------------------------------------------------------------------------------------------------------------------------------------------------------------------------------------------------------------------------------------------------------------------------------------------------------------------------------------------------------------------|--------------------------------------------------|-----------------------------------|--------------|-------------------|---------|
| <b>Chem. Name</b>                                                                                                                                                                                                                                                                                                                                                                                                                                                                                                                                                                                                                                                                                                                                                                                                                                                      | <b>4-(tert-butyl)-N,N-di-p-tolylaniline (6j)</b> |                                   |              |                   |         |
| <b>Lit. Ref.</b>                                                                                                                                                                                                                                                                                                                                                                                                                                                                                                                                                                                                                                                                                                                                                                                                                                                       |                                                  |                                   |              |                   |         |
| <p style="text-align: center;"> <chem>Cc1ccc(N)cc1C(C)(C)C</chem> (1f) + <chem>Cc1ccc(cc1)C(=O)C2CCCC2</chem> (2a)       <br/> <math>\xrightarrow[\text{1) air, 24 h; 2) O}_2, 24 \text{ h}]{\text{Pd/C (10 mol\%); p-TsOH (10 mol\%); CPME (1 M); 140}^\circ\text{C, reflux}}</math> <br/> <chem>Cc1ccc(cc1)N(Cc2ccc(C)cc2)C(C)(C)C</chem> (6j)     </p>                                                                                                                                                                                                                                                                                                                                                                                                                                                                                                              |                                                  |                                   |              |                   |         |
| <b>METHOD:</b>                                                                                                                                                                                                                                                                                                                                                                                                                                                                                                                                                                                                                                                                                                                                                                                                                                                         |                                                  |                                   |              |                   |         |
| <p>In a 10 mL round-bottom flask equipped with a magnetic stirrer, Pd/C (10 mol%; 53 mg), TsOH (10 mol%; 8.6 mg), CPME (1 M; 0,5 mL), 4-tert-buthylaniline (<b>1f</b>) (80 <math>\mu</math>L; 0.5 mmol), and 4-methylcyclohexanone (<b>2a</b>) (5 mmol, 0.6 mL) were consecutively added. After 24 hours at 140°C in an open vessel under reflux, a balloon of O<sub>2</sub> was connected, and the reaction was stirred for an additional 24 hours at 140°C. The conversion was evaluated by gas chromatographic analysis. Pd/C was filtered off from the reaction mixture and washed with CPME (10 mL). The pure product was obtained after column chromatography using silica as the stationary phase and ETP as the eluent. After vacuum drying, the pure product 4-(tert-butyl)-N,N-di-p-tolylaniline (<b>6j</b>) was obtained with an isolated yield of 61%.</p> |                                                  |                                   |              |                   |         |
| <b>Mol Formula</b>                                                                                                                                                                                                                                                                                                                                                                                                                                                                                                                                                                                                                                                                                                                                                                                                                                                     |                                                  | C <sub>24</sub> H <sub>27</sub> N |              | <b>m.p.</b>       | 68-71°C |
| <b><sup>1</sup>H NMR</b><br>400 MHz<br>CDCl <sub>3</sub>                                                                                                                                                                                                                                                                                                                                                                                                                                                                                                                                                                                                                                                                                                                                                                                                               | <b><math>\delta</math> value</b>                 | <b>No. H</b>                      | <b>Mult.</b> | <b>j value/Hz</b> |         |
|                                                                                                                                                                                                                                                                                                                                                                                                                                                                                                                                                                                                                                                                                                                                                                                                                                                                        | 7.24                                             | 2                                 | <i>d</i>     | 8.5               |         |
|                                                                                                                                                                                                                                                                                                                                                                                                                                                                                                                                                                                                                                                                                                                                                                                                                                                                        | 7.06                                             | 4                                 | <i>d</i>     | 8.3               |         |
|                                                                                                                                                                                                                                                                                                                                                                                                                                                                                                                                                                                                                                                                                                                                                                                                                                                                        | 7.011-6.98                                       | 6                                 | <i>m</i>     |                   |         |
|                                                                                                                                                                                                                                                                                                                                                                                                                                                                                                                                                                                                                                                                                                                                                                                                                                                                        | 2.33                                             | 6                                 | <i>s</i>     |                   |         |
|                                                                                                                                                                                                                                                                                                                                                                                                                                                                                                                                                                                                                                                                                                                                                                                                                                                                        | 1.33                                             | 9                                 | <i>s</i>     |                   |         |
| <sup>13</sup> C NMR (100.6 MHz, CDCl <sub>3</sub> ) $\delta$ : 148.14; 145.91; 145.15; 129.25; 126.19; 124.14; 123.98; 122.45; 31.59, 20.91.                                                                                                                                                                                                                                                                                                                                                                                                                                                                                                                                                                                                                                                                                                                           |                                                  |                                   |              |                   |         |
| <b>GC-EIMS (m/z, %):</b> 301 (60); 302 (15); 286 (100); 287 (24).                                                                                                                                                                                                                                                                                                                                                                                                                                                                                                                                                                                                                                                                                                                                                                                                      |                                                  |                                   |              |                   |         |

|                                                                                                                                                                                                                                                                                                                                                                                                                                                                                                                                                                                                                                                                                                                                                                                                                                                                     |                                                       |                                      |              |
|---------------------------------------------------------------------------------------------------------------------------------------------------------------------------------------------------------------------------------------------------------------------------------------------------------------------------------------------------------------------------------------------------------------------------------------------------------------------------------------------------------------------------------------------------------------------------------------------------------------------------------------------------------------------------------------------------------------------------------------------------------------------------------------------------------------------------------------------------------------------|-------------------------------------------------------|--------------------------------------|--------------|
| <b>Chem. Name</b>                                                                                                                                                                                                                                                                                                                                                                                                                                                                                                                                                                                                                                                                                                                                                                                                                                                   | <b>4-(tert-butyl)-<i>N,N</i>-diphenylaniline (6k)</b> |                                      |              |
| <b>Lit. Ref.</b>                                                                                                                                                                                                                                                                                                                                                                                                                                                                                                                                                                                                                                                                                                                                                                                                                                                    |                                                       |                                      |              |
| <p style="text-align: center;"> <chem>CC(C)(C)c1ccc(N)cc1</chem> (1f) + <chem>O=C1CCCCC1</chem> (2b) <math>\xrightarrow[\text{1) air, 24 h; 2) O}_2, 24 \text{ h}]{\text{Pd/C (10 mol\%); p-TsOH (10 mol\%); CPME (1 M); 140}^\circ\text{C, reflux}}</math> <chem>CC(C)(C)c1ccc(N(c2ccccc2)c3ccccc13)cc1</chem> (6k) </p>                                                                                                                                                                                                                                                                                                                                                                                                                                                                                                                                           |                                                       |                                      |              |
| <b>METHOD:</b>                                                                                                                                                                                                                                                                                                                                                                                                                                                                                                                                                                                                                                                                                                                                                                                                                                                      |                                                       |                                      |              |
| <p>In a 10 mL round-bottom flask equipped with a magnetic stirrer, Pd/C (10 mol%; 53 mg), TsOH (10 mol%; 8.6 mg), CPME (1 M; 0,5 mL), 4-tert-buthylaniline (<b>1f</b>) (80 <math>\mu</math>L; 0.5 mmol), and cyclohexanone (<b>2b</b>) (5 mmol, 0.5 mL) were consecutively added. After 24 hours at 140°C in an open vessel under reflux, a balloon of O<sub>2</sub> was connected, and the reaction was stirred for an additional 24 hours at 140°C. The conversion was evaluated by gas chromatographic analysis. Pd/C was filtered off from the reaction mixture and washed with CPME (10 mL). The pure product was obtained after column chromatography using silica as the stationary phase and ETP as the eluent. After vacuum drying, the pure product 4-(tert-butyl)-<i>N,N</i>-diphenylaniline (<b>6k</b>) was obtained with an isolated yield of 55%.</p> |                                                       |                                      |              |
| <b>Mol Formula</b>                                                                                                                                                                                                                                                                                                                                                                                                                                                                                                                                                                                                                                                                                                                                                                                                                                                  |                                                       | <b>C<sub>22</sub>H<sub>23</sub>N</b> |              |
| <b>m.p.</b>                                                                                                                                                                                                                                                                                                                                                                                                                                                                                                                                                                                                                                                                                                                                                                                                                                                         |                                                       | <b>68-71°C</b>                       |              |
| <b><sup>1</sup>H NMR</b><br><b>400 MHz</b><br><b>CDCl<sub>3</sub></b>                                                                                                                                                                                                                                                                                                                                                                                                                                                                                                                                                                                                                                                                                                                                                                                               | <b><math>\delta</math> value</b>                      | <b>No. H</b>                         | <b>Mult.</b> |
|                                                                                                                                                                                                                                                                                                                                                                                                                                                                                                                                                                                                                                                                                                                                                                                                                                                                     | 7.25-7.21                                             | 5                                    | <i>m</i>     |
|                                                                                                                                                                                                                                                                                                                                                                                                                                                                                                                                                                                                                                                                                                                                                                                                                                                                     | 7.08                                                  | 4                                    | <i>d</i>     |
|                                                                                                                                                                                                                                                                                                                                                                                                                                                                                                                                                                                                                                                                                                                                                                                                                                                                     | 7.03-6.96                                             | 5                                    | <i>m</i>     |
|                                                                                                                                                                                                                                                                                                                                                                                                                                                                                                                                                                                                                                                                                                                                                                                                                                                                     | 1.33                                                  | 9                                    | <i>s</i>     |
| <b><sup>13</sup>C NMR (100.6 MHz, CDCl<sub>3</sub>) <math>\delta</math>: 148.14;145.90; 145.15; 129.25;126.19; 124.14; 123.98; 122.45; 31.58.</b>                                                                                                                                                                                                                                                                                                                                                                                                                                                                                                                                                                                                                                                                                                                   |                                                       |                                      |              |
| <b>GC-EIMS (m/z, %): 301 (60); 302 (15); 286 (100); 287 (24).</b>                                                                                                                                                                                                                                                                                                                                                                                                                                                                                                                                                                                                                                                                                                                                                                                                   |                                                       |                                      |              |

|                                                                                                                                                                                                                                                                                                                                                                                                                                                                                                                                                                                                                                                                                                                                                                                                                                       |                                                                                                             |                                       |              |                   |            |
|---------------------------------------------------------------------------------------------------------------------------------------------------------------------------------------------------------------------------------------------------------------------------------------------------------------------------------------------------------------------------------------------------------------------------------------------------------------------------------------------------------------------------------------------------------------------------------------------------------------------------------------------------------------------------------------------------------------------------------------------------------------------------------------------------------------------------------------|-------------------------------------------------------------------------------------------------------------|---------------------------------------|--------------|-------------------|------------|
| <b>Chem. Name</b>                                                                                                                                                                                                                                                                                                                                                                                                                                                                                                                                                                                                                                                                                                                                                                                                                     | <b>4-methoxy-<i>N,N</i>-diphenylaniline (6I)</b>                                                            |                                       |              |                   |            |
| <b>Lit. Ref.</b>                                                                                                                                                                                                                                                                                                                                                                                                                                                                                                                                                                                                                                                                                                                                                                                                                      | T. Yamamoto, M. Nishiyama and Y. Koie, <i>J. Chem. Soc., Perkin Trans. 1</i> , 1998, <b>39</b> , 2367-2370. |                                       |              |                   |            |
| <p style="text-align: center;"> <chem>COC1=CC=C(N)C=C1</chem> (1g) + <chem>O=C1CCCCC1</chem> (2b) <math>\xrightarrow[\text{CPME (1 M)}]{\text{Pd/C (10 mol\%), p-TsOH (10 mol\%)}}</math> <chem>COC1=CC=C(N(C2=CC=CC=C2)C3=CC=CC=C3)C=C1</chem> (6I) </p> <p style="text-align: center;">     140°C, reflux<br/>     1) air, 24 h<br/>     2) O<sub>2</sub>, 24 h   </p>                                                                                                                                                                                                                                                                                                                                                                                                                                                              |                                                                                                             |                                       |              |                   |            |
| <b>METHOD:</b>                                                                                                                                                                                                                                                                                                                                                                                                                                                                                                                                                                                                                                                                                                                                                                                                                        |                                                                                                             |                                       |              |                   |            |
| <p>In a 10 mL round-bottom flask equipped with a magnetic stirrer, Pd/C (10 mol%; 53 mg), TsOH (10 mol%; 8.6 mg), CPME (1 M; 0.5 mL), p-anisidine (<b>1g</b>) (0.5 mmol, 62 mg), and cyclohexanone (<b>2b</b>) (5 mmol, 0.5 mL) were consecutively added. After 16 hours at 140°C in an open vessel under reflux, a balloon of O<sub>2</sub> was connected, and the reaction was stirred for an additional 6 hours at 140°C. The conversion was evaluated by gas chromatographic analysis. Pd/C was filtered off from the reaction mixture and washed with CPME (10 mL). The pure product was obtained after column chromatography using silica as the stationary phase and ETP as the eluent. After vacuum drying, the pure product 4-methoxy-<i>N,N</i>-diphenylaniline (<b>6I</b>) was obtained with an isolated yield of 75%.</p> |                                                                                                             |                                       |              |                   |            |
| <b>Mol Formula</b>                                                                                                                                                                                                                                                                                                                                                                                                                                                                                                                                                                                                                                                                                                                                                                                                                    |                                                                                                             | <b>C<sub>19</sub>H<sub>17</sub>NO</b> |              | <b>m.p.</b>       | 102-106 °C |
| <b><sup>1</sup>H NMR</b><br>400 MHz<br>CDCl <sub>3</sub>                                                                                                                                                                                                                                                                                                                                                                                                                                                                                                                                                                                                                                                                                                                                                                              | <b>δ value</b>                                                                                              | <b>No. H</b>                          | <b>Mult.</b> | <b>j value/Hz</b> |            |
|                                                                                                                                                                                                                                                                                                                                                                                                                                                                                                                                                                                                                                                                                                                                                                                                                                       | 7.19-7.23                                                                                                   | 4                                     | <i>t</i>     | 7.7               |            |
|                                                                                                                                                                                                                                                                                                                                                                                                                                                                                                                                                                                                                                                                                                                                                                                                                                       | 7.03-7.09                                                                                                   | 6                                     | <i>q</i>     |                   |            |
|                                                                                                                                                                                                                                                                                                                                                                                                                                                                                                                                                                                                                                                                                                                                                                                                                                       | 6.95                                                                                                        | 2                                     | <i>t</i>     | 7.1               |            |
|                                                                                                                                                                                                                                                                                                                                                                                                                                                                                                                                                                                                                                                                                                                                                                                                                                       | 6.85                                                                                                        | 2                                     | <i>d</i>     | 8.7               |            |
|                                                                                                                                                                                                                                                                                                                                                                                                                                                                                                                                                                                                                                                                                                                                                                                                                                       | 3.81                                                                                                        | 3                                     | <i>s</i>     |                   |            |
| <b><sup>13</sup>C NMR (100.6 MHz, CDCl<sub>3</sub>) δ:</b> 156.29; 148.31; 140.91; 129.20; 127.45; 123.01; 121.96; 114.88; 55.61.                                                                                                                                                                                                                                                                                                                                                                                                                                                                                                                                                                                                                                                                                                     |                                                                                                             |                                       |              |                   |            |
| <b>GC-EIMS (m/z, %):</b> 277 (22); 276 (100); 262 (17); 261 (83); 77 (16).                                                                                                                                                                                                                                                                                                                                                                                                                                                                                                                                                                                                                                                                                                                                                            |                                                                                                             |                                       |              |                   |            |

|                                                                                                                                                                                                                                                                                                                                                                                                                                                                                                                                                                                                                                                                                                                                                                                                                                                        |                                                                                                         |                                       |              |                   |         |
|--------------------------------------------------------------------------------------------------------------------------------------------------------------------------------------------------------------------------------------------------------------------------------------------------------------------------------------------------------------------------------------------------------------------------------------------------------------------------------------------------------------------------------------------------------------------------------------------------------------------------------------------------------------------------------------------------------------------------------------------------------------------------------------------------------------------------------------------------------|---------------------------------------------------------------------------------------------------------|---------------------------------------|--------------|-------------------|---------|
| <b>Chem. Name</b>                                                                                                                                                                                                                                                                                                                                                                                                                                                                                                                                                                                                                                                                                                                                                                                                                                      | <b>4-methoxy-<i>N,N</i>-di-<i>p</i>-tolylaniline (6m)</b>                                               |                                       |              |                   |         |
| <b>Lit. Ref.</b>                                                                                                                                                                                                                                                                                                                                                                                                                                                                                                                                                                                                                                                                                                                                                                                                                                       | Ganesh M. Kumbhar, Ajit H. Deshmukh, Sanjay S. Chavan, <i>J. Org. Chem.</i> 2024, <b>1021</b> , 123351. |                                       |              |                   |         |
| <p style="text-align: center;"> <chem>Nc1ccc(OC)cc1</chem> (1g) + <chem>CC1CCCCC1=O</chem> (2a) <math>\xrightarrow[\text{1) air, 24 h; 2) O}_2, 24 \text{ h}]{\text{Pd/C (10 mol\%); p-TsOH (10 mol\%); CPME (1 M); 140}^\circ\text{C, reflux}}</math> <chem>Cc1ccc(N(c2ccc(OC)cc2)c3ccc(C)cc3)cc1</chem> (6m) </p>                                                                                                                                                                                                                                                                                                                                                                                                                                                                                                                                    |                                                                                                         |                                       |              |                   |         |
| <b>METHOD:</b>                                                                                                                                                                                                                                                                                                                                                                                                                                                                                                                                                                                                                                                                                                                                                                                                                                         |                                                                                                         |                                       |              |                   |         |
| <p>In a 10 mL round-bottom flask equipped with a magnetic stirrer, Pd/C (10 mol%; 53 mg), TsOH (10 mol%; 8.6 mg), CPME (1 M; 0,5 mL), p-anisidine (<b>1g</b>) (0.5 mmol, 62 mg), and 4-methylcyclohexanone (<b>2a</b>) (5 mmol, 0.6 mL) were consecutively added. After 16 hours at 140°C in an open vessel under reflux, a balloon of O<sub>2</sub> was connected, and the reaction was stirred for an additional 6 hours at 140°C. The conversion was evaluated by gas chromatographic analysis. Pd/C was filtered off from the reaction mixture and washed with CPME (10 mL). The pure product was obtained after column chromatography using silica as the stationary phase and ETP as the eluent. After vacuum drying, the pure product 4-methoxy-<i>N,N</i>-di-<i>p</i>-tolylaniline (<b>6m</b>) was obtained with an isolated yield of 72%.</p> |                                                                                                         |                                       |              |                   |         |
| <b>Mol Formula</b>                                                                                                                                                                                                                                                                                                                                                                                                                                                                                                                                                                                                                                                                                                                                                                                                                                     |                                                                                                         | <b>C<sub>21</sub>H<sub>21</sub>NO</b> |              | <b>m.p.</b>       | 70-72°C |
| <b><sup>1</sup>H NMR</b><br>400 MHz<br>CDCl <sub>3</sub>                                                                                                                                                                                                                                                                                                                                                                                                                                                                                                                                                                                                                                                                                                                                                                                               | <b>δ value</b>                                                                                          | <b>No. H</b>                          | <b>Mult.</b> | <b>j value/Hz</b> |         |
|                                                                                                                                                                                                                                                                                                                                                                                                                                                                                                                                                                                                                                                                                                                                                                                                                                                        | 7.04-7.01                                                                                               | 6                                     | <i>m</i>     |                   |         |
|                                                                                                                                                                                                                                                                                                                                                                                                                                                                                                                                                                                                                                                                                                                                                                                                                                                        | 6.92                                                                                                    | 4                                     | <i>d</i>     | 8.1               |         |
|                                                                                                                                                                                                                                                                                                                                                                                                                                                                                                                                                                                                                                                                                                                                                                                                                                                        | 6.81                                                                                                    | 2                                     | <i>d</i>     | 8.1               |         |
|                                                                                                                                                                                                                                                                                                                                                                                                                                                                                                                                                                                                                                                                                                                                                                                                                                                        | 3.79                                                                                                    | 3                                     | <i>s</i>     |                   |         |
|                                                                                                                                                                                                                                                                                                                                                                                                                                                                                                                                                                                                                                                                                                                                                                                                                                                        | 2.29                                                                                                    | 6                                     | <i>s</i>     |                   |         |
| <b><sup>13</sup>C NMR (100.6 MHz, CDCl<sub>3</sub>) δ:</b> 155.74; 146.07; 141.47; 131.39; 129.80; 126.56; 123.20; 114.73; 55.62; 20.85                                                                                                                                                                                                                                                                                                                                                                                                                                                                                                                                                                                                                                                                                                                |                                                                                                         |                                       |              |                   |         |
| <b>GC-EIMS (m/z, %):</b> 304 (79); 303 (100); 289 (55); 288 (100); 152 (20); 91 (19); 65 (20).                                                                                                                                                                                                                                                                                                                                                                                                                                                                                                                                                                                                                                                                                                                                                         |                                                                                                         |                                       |              |                   |         |

|                                                                                                                                                                                                                                                                                                                                                                                                                                                                                                                                                                                                                                                                                                                                                                                                                                                    |                                                          |                                       |              |                   |         |
|----------------------------------------------------------------------------------------------------------------------------------------------------------------------------------------------------------------------------------------------------------------------------------------------------------------------------------------------------------------------------------------------------------------------------------------------------------------------------------------------------------------------------------------------------------------------------------------------------------------------------------------------------------------------------------------------------------------------------------------------------------------------------------------------------------------------------------------------------|----------------------------------------------------------|---------------------------------------|--------------|-------------------|---------|
| <b>Chem. Name</b>                                                                                                                                                                                                                                                                                                                                                                                                                                                                                                                                                                                                                                                                                                                                                                                                                                  | <b>4-fluoro-<i>N,N</i>-di-<i>p</i>-tolylaniline (6n)</b> |                                       |              |                   |         |
| <b>Lit. Ref.</b>                                                                                                                                                                                                                                                                                                                                                                                                                                                                                                                                                                                                                                                                                                                                                                                                                                   |                                                          |                                       |              |                   |         |
| <p style="text-align: center;"> <chem>Nc1ccc(F)cc1</chem> (1h) + <chem>CC1CCCCC1=O</chem> (2a) <math>\xrightarrow[\text{1) air, 24 h; 2) O}_2, 24 \text{ h}]{\text{Pd/C (10 mol\%); p-TsOH (10 mol\%); CPME (1 M); 140}^\circ\text{C, reflux}}</math> <chem>Cc1ccc(N(c2ccc(F)cc2)c3ccc(C)cc3)cc1</chem> (6n) </p>                                                                                                                                                                                                                                                                                                                                                                                                                                                                                                                                  |                                                          |                                       |              |                   |         |
| <b>METHOD:</b>                                                                                                                                                                                                                                                                                                                                                                                                                                                                                                                                                                                                                                                                                                                                                                                                                                     |                                                          |                                       |              |                   |         |
| <p>In a 10 mL round-bottom flask equipped with a magnetic stirrer, Pd/C (10 mol%; 53 mg), TsOH (10 mol%; 8.6 mg), CPME (1 M; 0,5 mL), p-fluoroaniline (<b>1h</b>) (0.5 mmol, 56 mg), and 4-methylcyclohexanone (<b>2a</b>) (5 mmol, 0.6 mL) were consecutively added. After 24 hours at 140°C in an open vessel under reflux, a balloon of O<sub>2</sub> was connected, and the reaction was stirred for an additional 24 hours at 140°C. The conversion was evaluated by gas chromatographic analysis. Pd/C was filtered off from the reaction mixture and washed with CPME (10 mL). The pure product was obtained after column chromatography using silica as the stationary phase and ETP as the eluent. After vacuum drying, the pure 4-fluoro-<i>N,N</i>-di-<i>p</i>-tolylaniline (<b>6n</b>) was obtained with an isolated yield of 62%.</p> |                                                          |                                       |              |                   |         |
| <b>Mol Formula</b>                                                                                                                                                                                                                                                                                                                                                                                                                                                                                                                                                                                                                                                                                                                                                                                                                                 |                                                          | <b>C<sub>20</sub>H<sub>18</sub>FN</b> |              | <b>m.p.</b>       | 80-82°C |
| <b><sup>1</sup>H NMR</b><br>400 MHz<br>CDCl <sub>3</sub>                                                                                                                                                                                                                                                                                                                                                                                                                                                                                                                                                                                                                                                                                                                                                                                           | <b>δ value</b>                                           | <b>No. H</b>                          | <b>Mult.</b> | <b>j value/Hz</b> |         |
|                                                                                                                                                                                                                                                                                                                                                                                                                                                                                                                                                                                                                                                                                                                                                                                                                                                    | 7.05                                                     | 4                                     | <i>d</i>     | 8.4               |         |
|                                                                                                                                                                                                                                                                                                                                                                                                                                                                                                                                                                                                                                                                                                                                                                                                                                                    | 7.03-7.00                                                | 2                                     | <i>m</i>     |                   |         |
|                                                                                                                                                                                                                                                                                                                                                                                                                                                                                                                                                                                                                                                                                                                                                                                                                                                    | 6.95-6.90                                                | 6                                     | <i>m</i>     |                   |         |
|                                                                                                                                                                                                                                                                                                                                                                                                                                                                                                                                                                                                                                                                                                                                                                                                                                                    | 2.30                                                     | 6                                     | <i>s</i>     |                   |         |
| <b><sup>13</sup>C NMR (100.6 MHz, CDCl<sub>3</sub>) δ:</b> 159.73; 157.33; 145.72; 144.49; 144.46; 132.20; 129.98; 125.50; 125.42; 123.90; 116.06; 115.84; 20.89.                                                                                                                                                                                                                                                                                                                                                                                                                                                                                                                                                                                                                                                                                  |                                                          |                                       |              |                   |         |
| <b><sup>19</sup>F NMR (100.6 MHz, CDCl<sub>3</sub>) δ:</b> -120.98.                                                                                                                                                                                                                                                                                                                                                                                                                                                                                                                                                                                                                                                                                                                                                                                |                                                          |                                       |              |                   |         |
| <b>GC-EIMS (m/z, %):</b> 292 (20); 291 (100); 290 (19); 240 (25); 91 (23); 65 (24).                                                                                                                                                                                                                                                                                                                                                                                                                                                                                                                                                                                                                                                                                                                                                                |                                                          |                                       |              |                   |         |

|                                                                                                                                                                                                                                                                                                                                                                                                                                                                                                                                                                                                                                                                                                                                                                                                                                   |                                                                                                               |                                    |              |                   |     |
|-----------------------------------------------------------------------------------------------------------------------------------------------------------------------------------------------------------------------------------------------------------------------------------------------------------------------------------------------------------------------------------------------------------------------------------------------------------------------------------------------------------------------------------------------------------------------------------------------------------------------------------------------------------------------------------------------------------------------------------------------------------------------------------------------------------------------------------|---------------------------------------------------------------------------------------------------------------|------------------------------------|--------------|-------------------|-----|
| <b>Chem. Name</b>                                                                                                                                                                                                                                                                                                                                                                                                                                                                                                                                                                                                                                                                                                                                                                                                                 | <b>4-fluoro-<i>N,N</i>-diphenylaniline (6o)</b>                                                               |                                    |              |                   |     |
| <b>Lit. Ref.</b>                                                                                                                                                                                                                                                                                                                                                                                                                                                                                                                                                                                                                                                                                                                                                                                                                  | Sachin G. Modha, Mihai V. Popescu and Michael F. Greaney, <i>J. Org. Chem.</i> 2017, <b>82</b> , 11933-11938. |                                    |              |                   |     |
| <p style="text-align: center;"> <chem>Nc1ccc(F)cc1</chem> (1h) + <chem>O=C1CCCCC1</chem> (2b) <math>\xrightarrow[\text{1) air, 24h; 2) O}_2, 24\text{ h}]{\text{Pd/C (10 mol\%); p-TsOH (10 mol\%); CPME (1 M); 140}^\circ\text{C, reflux}}</math> <chem>Fc1ccc(N(c2ccccc2)c3ccccc13)cc1</chem> (6o) </p>                                                                                                                                                                                                                                                                                                                                                                                                                                                                                                                         |                                                                                                               |                                    |              |                   |     |
| <b>METHOD:</b>                                                                                                                                                                                                                                                                                                                                                                                                                                                                                                                                                                                                                                                                                                                                                                                                                    |                                                                                                               |                                    |              |                   |     |
| <p>In a 10 mL round-bottom flask equipped with a magnetic stirrer, Pd/C (10 mol%; 53 mg), TsOH (10 mol%; 8.6 mg), CPME (1 M; 0,5 mL), p-fluoroaniline (<b>1h</b>) (0.5 mmol, 56 mg), and cyclohexanone (<b>2b</b>) (5 mmol, 0.5 mL) were consecutively added. After 24 hours at 140°C in an open vessel under reflux, a balloon of O<sub>2</sub> was connected, and the reaction was stirred for an additional 24 hours at 140°C. The conversion was evaluated by gas chromatographic analysis. Pd/C was filtered off from the reaction mixture and washed with CPME (10 mL). The pure product was obtained after column chromatography using silica as the stationary phase and ETP as the eluent. After vacuum drying, the pure 4-fluoro-<i>N,N</i>-diphenylaniline (<b>6o</b>) was obtained with an isolated yield of 75%.</p> |                                                                                                               |                                    |              |                   |     |
| <b>Mol Formula</b>                                                                                                                                                                                                                                                                                                                                                                                                                                                                                                                                                                                                                                                                                                                                                                                                                |                                                                                                               | C <sub>18</sub> H <sub>14</sub> FN |              | <b>m.p.</b>       | Oil |
| <b><sup>1</sup>H NMR</b><br>400 MHz<br>CDCl <sub>3</sub>                                                                                                                                                                                                                                                                                                                                                                                                                                                                                                                                                                                                                                                                                                                                                                          | <b>δ value</b>                                                                                                | <b>No. H</b>                       | <b>Mult.</b> | <b>j value/Hz</b> |     |
|                                                                                                                                                                                                                                                                                                                                                                                                                                                                                                                                                                                                                                                                                                                                                                                                                                   | 7.23                                                                                                          | 4                                  | <i>t</i>     | 8.2               |     |
|                                                                                                                                                                                                                                                                                                                                                                                                                                                                                                                                                                                                                                                                                                                                                                                                                                   | 7.08-7.03                                                                                                     | 6                                  | <i>m</i>     |                   |     |
|                                                                                                                                                                                                                                                                                                                                                                                                                                                                                                                                                                                                                                                                                                                                                                                                                                   | 7.01-6.94                                                                                                     | 4                                  | <i>m</i>     |                   |     |
| <b><sup>13</sup>C NMR (100.6 MHz, CDCl<sub>3</sub>) δ:</b> 160.26; 157.85; 148.03; 144.03; 129.38; 126.61; 123.67; 122.65; 116.31; 116.09                                                                                                                                                                                                                                                                                                                                                                                                                                                                                                                                                                                                                                                                                         |                                                                                                               |                                    |              |                   |     |
| <b><sup>19</sup>F NMR (100.6 MHz, CDCl<sub>3</sub>) δ:</b> -119.72.                                                                                                                                                                                                                                                                                                                                                                                                                                                                                                                                                                                                                                                                                                                                                               |                                                                                                               |                                    |              |                   |     |
| <b>GC-EIMS (m/z, %):</b> 264 (90); 263 (100); 262 (100); 185 (47); 184 (31); 167 (23); 166 (26); 160 (16); 159 (19); 77 (22); 51 (25).                                                                                                                                                                                                                                                                                                                                                                                                                                                                                                                                                                                                                                                                                            |                                                                                                               |                                    |              |                   |     |

|                                                                                                                                                                                                                                                                                                                                                                                                                                                                                                                                                                                                                                                                                                                                                                                                                                                  |                                               |                                   |              |                   |         |
|--------------------------------------------------------------------------------------------------------------------------------------------------------------------------------------------------------------------------------------------------------------------------------------------------------------------------------------------------------------------------------------------------------------------------------------------------------------------------------------------------------------------------------------------------------------------------------------------------------------------------------------------------------------------------------------------------------------------------------------------------------------------------------------------------------------------------------------------------|-----------------------------------------------|-----------------------------------|--------------|-------------------|---------|
| <b>Chem. Name</b>                                                                                                                                                                                                                                                                                                                                                                                                                                                                                                                                                                                                                                                                                                                                                                                                                                | <b>4-(tert-butyl)-N-(p-tolyl)aniline (3p)</b> |                                   |              |                   |         |
| <b>Lit. Ref.</b>                                                                                                                                                                                                                                                                                                                                                                                                                                                                                                                                                                                                                                                                                                                                                                                                                                 |                                               |                                   |              |                   |         |
| <p style="text-align: center;"> <chem>Nc1ccccc1</chem> (1b) + <chem>CC(C)(C)C1CCCCC1=O</chem> (2c)       <br/> <math>\xrightarrow[\text{1) air, 24 h; 2) O}_2, 24 \text{ h}]{\text{Pd/C (10 mol\%); p-TsOH (10 mol\%); CPME (1 M); 140}^\circ\text{C, reflux}}</math> <br/> <chem>CC(C)(C)C1=CC=C(NC2=CC=CC=C2)C=C1</chem> (3p)     </p>                                                                                                                                                                                                                                                                                                                                                                                                                                                                                                         |                                               |                                   |              |                   |         |
| <b>METHOD:</b>                                                                                                                                                                                                                                                                                                                                                                                                                                                                                                                                                                                                                                                                                                                                                                                                                                   |                                               |                                   |              |                   |         |
| <p>In a 10 mL round-bottom flask equipped with a magnetic stirrer, Pd/C (10 mol%; 53 mg), TsOH (10 mol%; 8.6 mg), CPME (1 M; 0,5 mL), aniline (<b>1b</b>) (0.5 mmol, 46 <math>\mu</math>L), and 4-tertbutylcyclohexanone (<b>2c</b>) (5 mmol, 81 mg) were consecutively added. After 24 hours at 140°C in an open vessel under reflux, a balloon of O<sub>2</sub> was connected, and the reaction was stirred for an additional 24 hours at 140°C. The conversion was evaluated by gas chromatographic analysis. Pd/C was filtered off from the reaction mixture and washed with CPME (10 mL). The pure product was obtained after column chromatography using silica as the stationary phase and ETP as the eluent. After vacuum drying, the pure 4-(tert-butyl)-N-(p-tolyl)aniline (<b>3p</b>) was obtained with an isolated yield of 85%.</p> |                                               |                                   |              |                   |         |
| <b>Mol Formula</b>                                                                                                                                                                                                                                                                                                                                                                                                                                                                                                                                                                                                                                                                                                                                                                                                                               |                                               | C <sub>17</sub> H <sub>21</sub> N |              | <b>m.p.</b>       | 39-42°C |
| <b><sup>1</sup>H NMR</b><br>400 MHz<br>CDCl <sub>3</sub>                                                                                                                                                                                                                                                                                                                                                                                                                                                                                                                                                                                                                                                                                                                                                                                         | <b><math>\delta</math> value</b>              | <b>No. H</b>                      | <b>Mult.</b> | <b>j value/Hz</b> |         |
|                                                                                                                                                                                                                                                                                                                                                                                                                                                                                                                                                                                                                                                                                                                                                                                                                                                  | 7.28                                          | 2                                 | s            |                   |         |
|                                                                                                                                                                                                                                                                                                                                                                                                                                                                                                                                                                                                                                                                                                                                                                                                                                                  | 7.07                                          | 2                                 | d            |                   |         |
|                                                                                                                                                                                                                                                                                                                                                                                                                                                                                                                                                                                                                                                                                                                                                                                                                                                  | 6.98                                          | 4                                 | t            |                   |         |
|                                                                                                                                                                                                                                                                                                                                                                                                                                                                                                                                                                                                                                                                                                                                                                                                                                                  | 5.54                                          | 1                                 | s            |                   |         |
|                                                                                                                                                                                                                                                                                                                                                                                                                                                                                                                                                                                                                                                                                                                                                                                                                                                  | 2.30                                          | 3                                 | s            |                   |         |
|                                                                                                                                                                                                                                                                                                                                                                                                                                                                                                                                                                                                                                                                                                                                                                                                                                                  | 1.31                                          | 9                                 | s            |                   |         |
| <b><sup>13</sup>C NMR (100.6 MHz, CDCl<sub>3</sub>) <math>\delta</math>:</b> 143.59; 141.30; 141.02; 130.41; 129.93; 126.22; 118.29; 117.25; 31.62; 20.78.                                                                                                                                                                                                                                                                                                                                                                                                                                                                                                                                                                                                                                                                                       |                                               |                                   |              |                   |         |
| <b>GC-EIMS (m/z, %):</b> 239 (100); 225 (68); 224 (100); 209 (29); 208 (22); 182 (17); 180 (16); 167 (15); 98 (15); 91 (17).                                                                                                                                                                                                                                                                                                                                                                                                                                                                                                                                                                                                                                                                                                                     |                                               |                                   |              |                   |         |

## 5. Spectral characterization data

|                                                                                                                                                                                                                                                                                                                                                                                                                                                                                                                                                                                                                                                                                                                                                                                                                           |                                                                                                             |                                   |              |                   |           |
|---------------------------------------------------------------------------------------------------------------------------------------------------------------------------------------------------------------------------------------------------------------------------------------------------------------------------------------------------------------------------------------------------------------------------------------------------------------------------------------------------------------------------------------------------------------------------------------------------------------------------------------------------------------------------------------------------------------------------------------------------------------------------------------------------------------------------|-------------------------------------------------------------------------------------------------------------|-----------------------------------|--------------|-------------------|-----------|
| <b>Chem. Name</b>                                                                                                                                                                                                                                                                                                                                                                                                                                                                                                                                                                                                                                                                                                                                                                                                         | <b>tri-p-tolylamine (6a)</b>                                                                                |                                   |              |                   |           |
| <b>Lit. Ref.</b>                                                                                                                                                                                                                                                                                                                                                                                                                                                                                                                                                                                                                                                                                                                                                                                                          | T. Yamamoto, M. Nishiyama and Y. Koie, <i>J. Chem. Soc., Perkin Trans. 1</i> , 1998, <b>39</b> , 2367-2370. |                                   |              |                   |           |
| <p>Reaction scheme showing the synthesis of tri-p-tolylamine (<b>6a</b>) from p-toluidine (<b>1a</b>) and 4-methylcyclohexanone (<b>2a</b>). The reaction conditions are Pd/C (10 mol%), p-TsOH (10 mol%), CPME (1 M), 140°C, reflux, 1) air, 16 h, 2) O<sub>2</sub>, 6 h.</p>                                                                                                                                                                                                                                                                                                                                                                                                                                                                                                                                            |                                                                                                             |                                   |              |                   |           |
| <b>METHOD:</b>                                                                                                                                                                                                                                                                                                                                                                                                                                                                                                                                                                                                                                                                                                                                                                                                            |                                                                                                             |                                   |              |                   |           |
| <p>In a 10 mL round-bottom flask equipped with a magnetic stirrer, Pd/C (10 mol%; 53 mg), TsOH (10 mol%; 8.6 mg), CPME (1 M; 0.5 mL), p-toluidina (<b>1a</b>) (0.5 mmol, 53 mg), and 4-methylcyclohexanone (<b>2a</b>) (5 mmol, 0.6 mL) were consecutively added. After 16 hours at 140°C in an open vessel under reflux, a balloon of O<sub>2</sub> was connected, and the reaction was stirred for an additional 6 hours at 140°C. The conversion was evaluated by gas chromatographic analysis. Pd/C was filtered off from the reaction mixture and washed with CPME (10 mL). The pure product was obtained after column chromatography using silica as the stationary phase and ETP as the eluent. After vacuum drying, the pure product tri-p-tolylamine (<b>6a</b>) was obtained with an isolated yield of 82%.</p> |                                                                                                             |                                   |              |                   |           |
| <b>Mol Formula</b>                                                                                                                                                                                                                                                                                                                                                                                                                                                                                                                                                                                                                                                                                                                                                                                                        |                                                                                                             | C <sub>21</sub> H <sub>21</sub> N |              | <b>m.p.</b>       | 116-118°C |
| <b><sup>1</sup>H NMR</b><br>400 MHz<br>CDCl <sub>3</sub>                                                                                                                                                                                                                                                                                                                                                                                                                                                                                                                                                                                                                                                                                                                                                                  | <b>δ value</b>                                                                                              | <b>No. H</b>                      | <b>Mult.</b> | <b>j value/Hz</b> |           |
|                                                                                                                                                                                                                                                                                                                                                                                                                                                                                                                                                                                                                                                                                                                                                                                                                           | 7.03                                                                                                        | 6                                 | <i>d</i>     | 8.1               |           |
|                                                                                                                                                                                                                                                                                                                                                                                                                                                                                                                                                                                                                                                                                                                                                                                                                           | 6.95                                                                                                        | 6                                 | <i>d</i>     | 8.2               |           |
|                                                                                                                                                                                                                                                                                                                                                                                                                                                                                                                                                                                                                                                                                                                                                                                                                           | 2.30                                                                                                        | 9                                 | <i>s</i>     |                   |           |
| <b><sup>13</sup>C NMR (100.6 MHz, CDCl<sub>3</sub>) δ:</b> 145.85; 131.89; 129.86; 124.00.                                                                                                                                                                                                                                                                                                                                                                                                                                                                                                                                                                                                                                                                                                                                |                                                                                                             |                                   |              |                   |           |
| <b>GC-EIMS (m/z, %):</b> 288 (79); 287 (100); 286 (52); 271 (25), 194 (15); 181 (18); 180 (27); 91 (15); 65 (18).                                                                                                                                                                                                                                                                                                                                                                                                                                                                                                                                                                                                                                                                                                         |                                                                                                             |                                   |              |                   |           |

|                                                                                                                                                                                                                                                                                                                                                                                                                                                                                                                                                                                                                                                                                                                                                                                                                                            |                                                                                                             |                                   |              |                   |         |
|--------------------------------------------------------------------------------------------------------------------------------------------------------------------------------------------------------------------------------------------------------------------------------------------------------------------------------------------------------------------------------------------------------------------------------------------------------------------------------------------------------------------------------------------------------------------------------------------------------------------------------------------------------------------------------------------------------------------------------------------------------------------------------------------------------------------------------------------|-------------------------------------------------------------------------------------------------------------|-----------------------------------|--------------|-------------------|---------|
| <b>Chem. Name</b>                                                                                                                                                                                                                                                                                                                                                                                                                                                                                                                                                                                                                                                                                                                                                                                                                          | <b>4-methyl-<i>N</i>, <i>N</i>-diphenylaniline (6b)</b>                                                     |                                   |              |                   |         |
| <b>Lit. Ref.</b>                                                                                                                                                                                                                                                                                                                                                                                                                                                                                                                                                                                                                                                                                                                                                                                                                           | T. Yamamoto, M. Nishiyama and Y. Koie, <i>J. Chem. Soc., Perkin Trans. 1</i> , 1998, <b>39</b> , 2367-2370. |                                   |              |                   |         |
| <p style="text-align: center;"> <chem>Cc1ccc(N)cc1</chem> (1a) + <chem>O=C1CCCCC1</chem> (2b) <math>\xrightarrow[\text{1) air, 16 h; 2) O}_2, 6 \text{ h}]{\text{Pd/C (10 mol\%); p-TsOH (10 mol\%); CPME (1 M)}}</math> <chem>Cc1ccc(N(c2ccccc2)c3ccccc13)cc1</chem> (6b) </p>                                                                                                                                                                                                                                                                                                                                                                                                                                                                                                                                                            |                                                                                                             |                                   |              |                   |         |
| <b>METHOD:</b>                                                                                                                                                                                                                                                                                                                                                                                                                                                                                                                                                                                                                                                                                                                                                                                                                             |                                                                                                             |                                   |              |                   |         |
| <p>In a 10 mL round-bottom flask equipped with a magnetic stirrer, Pd/C (10 mol%; 53 mg), TsOH (10 mol%; 8.6 mg), CPME (1 M; 0,5 mL), p-toluidina (<b>1a</b>) (0.5 mmol, 53 mg), and cyclohexanone (<b>2b</b>) (5 mmol, 0.5 mL) were consecutively added. After 16 hours at 140°C in an open vessel under reflux, a balloon of O<sub>2</sub> was connected, and the reaction was stirred for an additional 6 hours at 140°C. The conversion was evaluated by gas chromatographic analysis. Pd/C was filtered off from the reaction mixture and washed with CPME (10 mL). The pure product was obtained after column chromatography using silica as the stationary phase and ETP as the eluent. After vacuum drying, the pure product 4-methyl-<i>N</i>, <i>N</i>-diphenylamina (<b>6b</b>) was obtained with an isolated yield of 59%.</p> |                                                                                                             |                                   |              |                   |         |
| <b>Mol Formula</b>                                                                                                                                                                                                                                                                                                                                                                                                                                                                                                                                                                                                                                                                                                                                                                                                                         |                                                                                                             | C <sub>19</sub> H <sub>17</sub> N |              | <b>m.p.</b>       | 66-69°C |
| <b><sup>1</sup>H NMR</b><br>400 MHz<br>CDCl <sub>3</sub>                                                                                                                                                                                                                                                                                                                                                                                                                                                                                                                                                                                                                                                                                                                                                                                   | <b>δ value</b>                                                                                              | <b>No. H</b>                      | <b>Mult.</b> | <b>j value/Hz</b> |         |
|                                                                                                                                                                                                                                                                                                                                                                                                                                                                                                                                                                                                                                                                                                                                                                                                                                            | 7.22                                                                                                        | 4                                 | <i>t</i>     | 7.9               |         |
|                                                                                                                                                                                                                                                                                                                                                                                                                                                                                                                                                                                                                                                                                                                                                                                                                                            | 7.09-7.05                                                                                                   | 6                                 | <i>m</i>     |                   |         |
|                                                                                                                                                                                                                                                                                                                                                                                                                                                                                                                                                                                                                                                                                                                                                                                                                                            | 7.02-6.95                                                                                                   | 4                                 | <i>m</i>     |                   |         |
|                                                                                                                                                                                                                                                                                                                                                                                                                                                                                                                                                                                                                                                                                                                                                                                                                                            | 2.31                                                                                                        | 3                                 | <i>s</i>     |                   |         |
| <b><sup>13</sup>C NMR (100.6 MHz, CDCl<sub>3</sub>) δ:</b> 148.18; 145.39; 132.88; 130.05; 129.24; 125.08; 123.74; 122.35; 20.97.                                                                                                                                                                                                                                                                                                                                                                                                                                                                                                                                                                                                                                                                                                          |                                                                                                             |                                   |              |                   |         |
| <b>GC-EIMS (m/z, %):</b> 261 (22); 260 (100); 259 (100); 258 (100); 257 (26); 256 (24); 243 (100); 242 (40); 241 (29); 182 (15); 181 (23); 180 (61); 168 (31); 167 (100); 166 (72); 165 (15); 156 (27); 155 (22); 153 (22); 152 (24); 142 (23); 141 (48); 140 (18); 139 (19); 130 (39); 129 (47); 127 (23); 121 (18); 121 (23).                                                                                                                                                                                                                                                                                                                                                                                                                                                                                                            |                                                                                                             |                                   |              |                   |         |

|                                                                                                                                                                                                                                                                                                                                                                                                                                                                                                                                                                                                                                                                                                                                                                                                                                                                                     |                                                                                        |                                   |              |                   |           |
|-------------------------------------------------------------------------------------------------------------------------------------------------------------------------------------------------------------------------------------------------------------------------------------------------------------------------------------------------------------------------------------------------------------------------------------------------------------------------------------------------------------------------------------------------------------------------------------------------------------------------------------------------------------------------------------------------------------------------------------------------------------------------------------------------------------------------------------------------------------------------------------|----------------------------------------------------------------------------------------|-----------------------------------|--------------|-------------------|-----------|
| <b>Chem. Name</b>                                                                                                                                                                                                                                                                                                                                                                                                                                                                                                                                                                                                                                                                                                                                                                                                                                                                   | <b>3-methyl-<i>N</i>-(<i>m</i>-tolyl)-<i>N</i>-(<i>p</i>-tolyl)aniline (<b>6c</b>)</b> |                                   |              |                   |           |
| <b>Lit. Ref.</b>                                                                                                                                                                                                                                                                                                                                                                                                                                                                                                                                                                                                                                                                                                                                                                                                                                                                    |                                                                                        |                                   |              |                   |           |
| <p style="text-align: center;"> <chem>Nc1ccc(C)cc1</chem> (1a) + <chem>CC1CCCCC1=O</chem> (2c) <math>\xrightarrow[\text{1) air, 16 h; 2) O}_2, 6 \text{ h}]{\text{Pd/C (10 mol\%); p-TsOH (10 mol\%); CPME (1 M); 140}^\circ\text{C, reflux}}</math> <chem>Cc1ccc(N(c2ccc(C)cc2)c3ccc(C)cc3)cc1</chem> (6c) </p>                                                                                                                                                                                                                                                                                                                                                                                                                                                                                                                                                                    |                                                                                        |                                   |              |                   |           |
| <b>METHOD:</b>                                                                                                                                                                                                                                                                                                                                                                                                                                                                                                                                                                                                                                                                                                                                                                                                                                                                      |                                                                                        |                                   |              |                   |           |
| <p>In a 10 mL round-bottom flask equipped with a magnetic stirrer, Pd/C (10 mol%; 53 mg), TsOH (10 mol%; 8.6 mg), CPME (1 M; 0.5 mL), <i>p</i>-toluidina (<b>1a</b>) (0.5 mmol, 53 mg), and 3-methylcyclohexanone (<b>2c</b>) (5 mmol, 0.5 mL) were consecutively added. After 16 hours at 140°C in an open vessel under reflux, a balloon of O<sub>2</sub> was connected, and the reaction was stirred for an additional 6 hours at 140°C. The conversion was evaluated by gas chromatographic analysis. Pd/C was filtered off from the reaction mixture and washed with CPME (10 mL). The pure product was obtained after column chromatography using silica as the stationary phase and ETP as the eluent. After vacuum drying, the pure product 3-methyl-<i>N</i>-(<i>m</i>-tolyl)-<i>N</i>-(<i>p</i>-tolyl)aniline (<b>6c</b>) was obtained with an isolated yield of 70%.</p> |                                                                                        |                                   |              |                   |           |
| <b>Mol Formula</b>                                                                                                                                                                                                                                                                                                                                                                                                                                                                                                                                                                                                                                                                                                                                                                                                                                                                  |                                                                                        | C <sub>21</sub> H <sub>21</sub> N |              | <b>m.p.</b>       | 111-113°C |
| <b><sup>1</sup>H NMR</b><br>400 MHz<br>CDCl <sub>3</sub>                                                                                                                                                                                                                                                                                                                                                                                                                                                                                                                                                                                                                                                                                                                                                                                                                            | <b>δ value</b>                                                                         | <b>No. H</b>                      | <b>Mult.</b> | <b>j value/Hz</b> |           |
|                                                                                                                                                                                                                                                                                                                                                                                                                                                                                                                                                                                                                                                                                                                                                                                                                                                                                     | 7.12                                                                                   | 2                                 | <i>t</i>     | 7.8               |           |
|                                                                                                                                                                                                                                                                                                                                                                                                                                                                                                                                                                                                                                                                                                                                                                                                                                                                                     | 7.07                                                                                   | 2                                 | <i>d</i>     | 8.6               |           |
|                                                                                                                                                                                                                                                                                                                                                                                                                                                                                                                                                                                                                                                                                                                                                                                                                                                                                     | 6.89                                                                                   | 2                                 | <i>s</i>     |                   |           |
|                                                                                                                                                                                                                                                                                                                                                                                                                                                                                                                                                                                                                                                                                                                                                                                                                                                                                     | 6.86                                                                                   | 2                                 | <i>d</i>     | 7.4               |           |
|                                                                                                                                                                                                                                                                                                                                                                                                                                                                                                                                                                                                                                                                                                                                                                                                                                                                                     | 6.80                                                                                   | 2                                 | <i>d</i>     | 7.4               |           |
|                                                                                                                                                                                                                                                                                                                                                                                                                                                                                                                                                                                                                                                                                                                                                                                                                                                                                     | 2.33                                                                                   | 3                                 | <i>s</i>     |                   |           |
|                                                                                                                                                                                                                                                                                                                                                                                                                                                                                                                                                                                                                                                                                                                                                                                                                                                                                     | 2.26                                                                                   | 6                                 | <i>s</i>     |                   |           |
| <b><sup>13</sup>C NMR (100.6 MHz, CDCl<sub>3</sub>) δ:</b> 148.23; 145.60; 139.04; 132.49; 129.02; 124.90; 124.51; 123.23; 121.09; 21.57; 20.97.                                                                                                                                                                                                                                                                                                                                                                                                                                                                                                                                                                                                                                                                                                                                    |                                                                                        |                                   |              |                   |           |
| <b>GC-EIMS (m/z, %):</b> 385 (45); 269 (23); 287 (75); 196 (58); 206 (20)                                                                                                                                                                                                                                                                                                                                                                                                                                                                                                                                                                                                                                                                                                                                                                                                           |                                                                                        |                                   |              |                   |           |

|                                                                                                                                                                                                                                                                                                                                                                                                                                                                                                                                                                                                                                                                                                                                                                                                                                                          |                                                                                                               |                                   |              |                   |           |
|----------------------------------------------------------------------------------------------------------------------------------------------------------------------------------------------------------------------------------------------------------------------------------------------------------------------------------------------------------------------------------------------------------------------------------------------------------------------------------------------------------------------------------------------------------------------------------------------------------------------------------------------------------------------------------------------------------------------------------------------------------------------------------------------------------------------------------------------------------|---------------------------------------------------------------------------------------------------------------|-----------------------------------|--------------|-------------------|-----------|
| <b>Chem. Name</b>                                                                                                                                                                                                                                                                                                                                                                                                                                                                                                                                                                                                                                                                                                                                                                                                                                        | <b>4-methyl-N-phenyl-N-(p-tolyl)aniline (6d)</b>                                                              |                                   |              |                   |           |
| <b>Lit. Ref.</b>                                                                                                                                                                                                                                                                                                                                                                                                                                                                                                                                                                                                                                                                                                                                                                                                                                         | Sachin G. Modha, Mihai V. Popescu and Michael F. Greaney, <i>J. Org. Chem.</i> 2017, <b>82</b> , 11933-11938. |                                   |              |                   |           |
| <p style="text-align: center;"> <chem>Nc1ccccc1</chem> (1b) + <chem>CC1CCCCC1=O</chem> (2a) <math>\xrightarrow[\text{1) air, 16 h; 2) O}_2, 6 \text{ h}]{\text{Pd/C (10 mol\%); p-TsOH (10 mol\%); CPME (1 M); 140}^\circ\text{C, reflux}}</math> <chem>Cc1ccc(cc1)N(c2ccccc2)c3ccc(C)cc3</chem> (6d) </p>                                                                                                                                                                                                                                                                                                                                                                                                                                                                                                                                               |                                                                                                               |                                   |              |                   |           |
| <b>METHOD:</b>                                                                                                                                                                                                                                                                                                                                                                                                                                                                                                                                                                                                                                                                                                                                                                                                                                           |                                                                                                               |                                   |              |                   |           |
| <p>In a 10 mL round-bottom flask equipped with a magnetic stirrer, Pd/C (10 mol%; 53 mg), TsOH (10 mol%; 8.6 mg), CPME (1 M; 0.5 mL), aniline (<b>1b</b>) (0.5 mmol, 46 <math>\mu</math>L), and 4-methylcyclohexanone (<b>2c</b>) (5 mmol, 0.6 mL) were consecutively added. After 16 hours at 140°C in an open vessel under reflux, a balloon of O<sub>2</sub> was connected, and the reaction was stirred for an additional 6 hours at 140°C. The conversion was evaluated by gas chromatographic analysis. Pd/C was filtered off from the reaction mixture and washed with CPME (10 mL). The pure product was obtained after column chromatography using silica as the stationary phase and ETP as the eluent. After vacuum drying, the pure product 4-methyl-N-phenyl-N-(p-tolyl)aniline (<b>6d</b>) was obtained with an isolated yield of 75%.</p> |                                                                                                               |                                   |              |                   |           |
| <b>Mol Formula</b>                                                                                                                                                                                                                                                                                                                                                                                                                                                                                                                                                                                                                                                                                                                                                                                                                                       |                                                                                                               | C <sub>20</sub> H <sub>19</sub> N |              | <b>m.p.</b>       | 111-113°C |
| <b><sup>1</sup>H NMR</b><br>400 MHz<br>CDCl <sub>3</sub>                                                                                                                                                                                                                                                                                                                                                                                                                                                                                                                                                                                                                                                                                                                                                                                                 | <b><math>\delta</math> value</b>                                                                              | <b>No. H</b>                      | <b>Mult.</b> | <b>j value/Hz</b> |           |
|                                                                                                                                                                                                                                                                                                                                                                                                                                                                                                                                                                                                                                                                                                                                                                                                                                                          | 7.20                                                                                                          | 2                                 | <i>t</i>     | 7.7               |           |
|                                                                                                                                                                                                                                                                                                                                                                                                                                                                                                                                                                                                                                                                                                                                                                                                                                                          | 7.06-6.97                                                                                                     | 10                                | <i>m</i>     |                   |           |
|                                                                                                                                                                                                                                                                                                                                                                                                                                                                                                                                                                                                                                                                                                                                                                                                                                                          | 6.93                                                                                                          | 1                                 | <i>t</i>     | 7.5               |           |
|                                                                                                                                                                                                                                                                                                                                                                                                                                                                                                                                                                                                                                                                                                                                                                                                                                                          | 2.31                                                                                                          | 6                                 | <i>s</i>     |                   |           |
| <b><sup>13</sup>C NMR (100.6 MHz, CDCl<sub>3</sub>) <math>\delta</math>:</b> 148.41; 145.59; 132.43; 129.96; 129.15; 124.59; 123.08; 121.83; 20.93.                                                                                                                                                                                                                                                                                                                                                                                                                                                                                                                                                                                                                                                                                                      |                                                                                                               |                                   |              |                   |           |
| <b>GC-EIMS (m/z, %):</b> 275 (25); 273 (100); 258 (63); 257 (97); 256 (46); 254 (17); 243 (30); 241 (15); 194 (18); 182 (15); 181 (29); 180 (60); 167 (47); 166 (24); 156 (17); 155 (21); 154 (16); 153 (17); 152 (15); 141 (15); 137 (34); 135 (20); 128 (29); 127 (22); 115 (17); 91 (21); 77 (19).                                                                                                                                                                                                                                                                                                                                                                                                                                                                                                                                                    |                                                                                                               |                                   |              |                   |           |

|                                                                                                                                                                                                                                                                                                                                                                                                                                                                                                                                                                                                                                                                                                                                                                                                                            |                                                                                                             |                                   |              |                   |           |
|----------------------------------------------------------------------------------------------------------------------------------------------------------------------------------------------------------------------------------------------------------------------------------------------------------------------------------------------------------------------------------------------------------------------------------------------------------------------------------------------------------------------------------------------------------------------------------------------------------------------------------------------------------------------------------------------------------------------------------------------------------------------------------------------------------------------------|-------------------------------------------------------------------------------------------------------------|-----------------------------------|--------------|-------------------|-----------|
| <b>Chem. Name</b>                                                                                                                                                                                                                                                                                                                                                                                                                                                                                                                                                                                                                                                                                                                                                                                                          | <b>Triphenylamine (6e)</b>                                                                                  |                                   |              |                   |           |
| <b>Lit. Ref.</b>                                                                                                                                                                                                                                                                                                                                                                                                                                                                                                                                                                                                                                                                                                                                                                                                           | T. Yamamoto, M. Nishiyama and Y. Koie, <i>J. Chem. Soc., Perkin Trans. 1</i> , 1998, <b>39</b> , 2367-2370. |                                   |              |                   |           |
| <p style="text-align: center;"> <chem>Nc1ccccc1</chem> (1b) + <chem>O=C1CCCCC1</chem> (2b) <math>\xrightarrow[\text{1) air, 16 h; 2) O}_2, 6 \text{ h}]{\text{Pd/C (10 mol\%); p-TsOH (10 mol\%); CPME (1 M); 140}^\circ\text{C, reflux}}</math> <chem>c1ccc(cc1)N(c2ccccc2)c3ccccc3</chem> (6e) </p>                                                                                                                                                                                                                                                                                                                                                                                                                                                                                                                      |                                                                                                             |                                   |              |                   |           |
| <b>METHOD:</b>                                                                                                                                                                                                                                                                                                                                                                                                                                                                                                                                                                                                                                                                                                                                                                                                             |                                                                                                             |                                   |              |                   |           |
| <p>In a 10 mL round-bottom flask equipped with a magnetic stirrer, Pd/C (10 mol%; 53 mg), TsOH (10 mol%; 8.6 mg), CPME (1 M; 0,5 mL), aniline (<b>1b</b>) (0.5 mmol, 46 <math>\mu</math>L), and cyclohexanone (<b>2b</b>) (5 mmol, 0.5 mL) were consecutively added. After 16 hours at 140°C in an open vessel under reflux, a balloon of O<sub>2</sub> was connected, and the reaction was stirred for an additional 6 hours at 140°C. The conversion was evaluated by gas chromatographic analysis. Pd/C was filtered off from the reaction mixture and washed with CPME (10 mL). The pure product was obtained after column chromatography using silica as the stationary phase and ETP as the eluent. After vacuum drying, the pure product triphenylamine (<b>6e</b>) was obtained with an isolated yield of 63%.</p> |                                                                                                             |                                   |              |                   |           |
| <b>Mol Formula</b>                                                                                                                                                                                                                                                                                                                                                                                                                                                                                                                                                                                                                                                                                                                                                                                                         |                                                                                                             | C <sub>18</sub> H <sub>15</sub> N |              | <b>m.p.</b>       | 126-128°C |
| <b><sup>1</sup>H NMR</b><br>400 MHz<br>CDCl <sub>3</sub>                                                                                                                                                                                                                                                                                                                                                                                                                                                                                                                                                                                                                                                                                                                                                                   | <b><math>\delta</math> value</b>                                                                            | <b>No. H</b>                      | <b>Mult.</b> | <b>j value/Hz</b> |           |
|                                                                                                                                                                                                                                                                                                                                                                                                                                                                                                                                                                                                                                                                                                                                                                                                                            | 7.23                                                                                                        | 6                                 | <i>d</i>     | 7.6               |           |
|                                                                                                                                                                                                                                                                                                                                                                                                                                                                                                                                                                                                                                                                                                                                                                                                                            | 7.09                                                                                                        | 6                                 | <i>d</i>     | 7.9               |           |
|                                                                                                                                                                                                                                                                                                                                                                                                                                                                                                                                                                                                                                                                                                                                                                                                                            | 7.00                                                                                                        | 3                                 | <i>t</i>     | 7.2               |           |
| <b><sup>13</sup>C NMR (100.6 MHz, CDCl<sub>3</sub>) <math>\delta</math>:</b> 148.00; 129.33; 124.30; 122.80.                                                                                                                                                                                                                                                                                                                                                                                                                                                                                                                                                                                                                                                                                                               |                                                                                                             |                                   |              |                   |           |
| <b>GC-EIMS (m/z, %):</b> 247 (21); 246 (100); 245 (39); 168 (15).                                                                                                                                                                                                                                                                                                                                                                                                                                                                                                                                                                                                                                                                                                                                                          |                                                                                                             |                                   |              |                   |           |

|                                                                                                                                                                                                                                                                                                                                                                                                                                                                                                                                                                                                                                                                                                                                                                                                                                                                          |                                                          |                                      |              |                   |           |
|--------------------------------------------------------------------------------------------------------------------------------------------------------------------------------------------------------------------------------------------------------------------------------------------------------------------------------------------------------------------------------------------------------------------------------------------------------------------------------------------------------------------------------------------------------------------------------------------------------------------------------------------------------------------------------------------------------------------------------------------------------------------------------------------------------------------------------------------------------------------------|----------------------------------------------------------|--------------------------------------|--------------|-------------------|-----------|
| <b>Chem. Name</b>                                                                                                                                                                                                                                                                                                                                                                                                                                                                                                                                                                                                                                                                                                                                                                                                                                                        | <b>3-methyl-<i>N,N</i>-di-<i>p</i>-tolylaniline (6f)</b> |                                      |              |                   |           |
| <b>Lit. Ref.</b>                                                                                                                                                                                                                                                                                                                                                                                                                                                                                                                                                                                                                                                                                                                                                                                                                                                         |                                                          |                                      |              |                   |           |
| <p style="text-align: center;"> <chem>Cc1ccc(N)cc1</chem> + <chem>Cc1ccc(O)cc1</chem> <br/> <b>1c</b>                      <b>2a</b> </p> <p style="text-align: center;"> <b>140°C, reflux</b><br/> <b>1) air, 16 h</b><br/> <b>2) O<sub>2</sub>, 6 h</b> </p> <p style="text-align: center;"> <chem>Cc1ccc(N(Cc2ccc(C)cc2)Cc3ccc(C)cc3)cc1</chem> <br/> <b>6f</b> </p>                                                                                                                                                                                                                                                                                                                                                                                                                                                                                                  |                                                          |                                      |              |                   |           |
| <b>METHOD:</b>                                                                                                                                                                                                                                                                                                                                                                                                                                                                                                                                                                                                                                                                                                                                                                                                                                                           |                                                          |                                      |              |                   |           |
| <p>In a 10 mL round-bottom flask equipped with a magnetic stirrer, Pd/C (10 mol%; 53 mg), TsOH (10 mol%; 8.6 mg), CPME (1 M; 0,5 mL), 3-methylaniline (<b>1c</b>) (0.5 mmol, 54 <math>\mu</math>L), and 4-methylcyclohexanone (<b>2a</b>) (5 mmol, 0.6 mL) were consecutively added. After 16 hours at 140°C in an open vessel under reflux, a balloon of O<sub>2</sub> was connected, and the reaction was stirred for an additional 6 hours at 140°C. The conversion was evaluated by gas chromatographic analysis. Pd/C was filtered off from the reaction mixture and washed with CPME (10 mL). The pure product was obtained after column chromatography using silica as the stationary phase and ETP as the eluent. After vacuum drying, the pure product 3-methyl-<i>N,N</i>-di-<i>p</i>-tolylaniline (<b>6f</b>) was obtained with an isolated yield of 69%.</p> |                                                          |                                      |              |                   |           |
| <b>Mol Formula</b>                                                                                                                                                                                                                                                                                                                                                                                                                                                                                                                                                                                                                                                                                                                                                                                                                                                       |                                                          | <b>C<sub>21</sub>H<sub>21</sub>N</b> |              | <b>m.p.</b>       | 198-200°C |
| <b><sup>1</sup>H NMR</b><br><b>400 MHz</b><br><b>CDCl<sub>3</sub></b>                                                                                                                                                                                                                                                                                                                                                                                                                                                                                                                                                                                                                                                                                                                                                                                                    | <b><math>\delta</math> value</b>                         | <b>No. H</b>                         | <b>Mult.</b> | <b>j value/Hz</b> |           |
|                                                                                                                                                                                                                                                                                                                                                                                                                                                                                                                                                                                                                                                                                                                                                                                                                                                                          | 7.09                                                     | 1                                    | <i>t</i>     | 7.5               |           |
|                                                                                                                                                                                                                                                                                                                                                                                                                                                                                                                                                                                                                                                                                                                                                                                                                                                                          | 7.05                                                     | 4                                    | <i>d</i>     | 7.8               |           |
|                                                                                                                                                                                                                                                                                                                                                                                                                                                                                                                                                                                                                                                                                                                                                                                                                                                                          | 6.97                                                     | 4                                    | <i>d</i>     | 7.8               |           |
|                                                                                                                                                                                                                                                                                                                                                                                                                                                                                                                                                                                                                                                                                                                                                                                                                                                                          | 6.87                                                     | 1                                    | <i>s</i>     |                   |           |
|                                                                                                                                                                                                                                                                                                                                                                                                                                                                                                                                                                                                                                                                                                                                                                                                                                                                          | 6.82                                                     | 1                                    | <i>d</i>     | 7.8               |           |
|                                                                                                                                                                                                                                                                                                                                                                                                                                                                                                                                                                                                                                                                                                                                                                                                                                                                          | 6.76                                                     | 1                                    | <i>d</i>     | 7.4               |           |
|                                                                                                                                                                                                                                                                                                                                                                                                                                                                                                                                                                                                                                                                                                                                                                                                                                                                          | 2.31                                                     | 6                                    | <i>s</i>     |                   |           |
| 2.24                                                                                                                                                                                                                                                                                                                                                                                                                                                                                                                                                                                                                                                                                                                                                                                                                                                                     | 3                                                        | <i>s</i>                             |              |                   |           |
| <sup>13</sup> C NMR (100.6 MHz, CDCl <sub>3</sub> ) $\delta$ : 148.34; 145.71; 138.98; 132.23; 129.90; 128.97; 124.51; 123.91; 122.87; 120.51; 31.06; 20.92.                                                                                                                                                                                                                                                                                                                                                                                                                                                                                                                                                                                                                                                                                                             |                                                          |                                      |              |                   |           |
| <b>GC-EIMS (m/z, %):</b> 329 (28); 320 (50); 287 (78); 200 (23); 158 (30)                                                                                                                                                                                                                                                                                                                                                                                                                                                                                                                                                                                                                                                                                                                                                                                                |                                                          |                                      |              |                   |           |

|                                                                                                                                                                                                                                                                                                                                                                                                                                                                                                                                                                                                                                                                                                                                                                                                                                                                                  |                                                              |                                      |              |                   |         |
|----------------------------------------------------------------------------------------------------------------------------------------------------------------------------------------------------------------------------------------------------------------------------------------------------------------------------------------------------------------------------------------------------------------------------------------------------------------------------------------------------------------------------------------------------------------------------------------------------------------------------------------------------------------------------------------------------------------------------------------------------------------------------------------------------------------------------------------------------------------------------------|--------------------------------------------------------------|--------------------------------------|--------------|-------------------|---------|
| <b>Chem. Name</b>                                                                                                                                                                                                                                                                                                                                                                                                                                                                                                                                                                                                                                                                                                                                                                                                                                                                | <b>3,5-dimethyl-<i>N,N</i>-di-<i>p</i>-tolylaniline (6g)</b> |                                      |              |                   |         |
| <b>Lit. Ref.</b>                                                                                                                                                                                                                                                                                                                                                                                                                                                                                                                                                                                                                                                                                                                                                                                                                                                                 |                                                              |                                      |              |                   |         |
| <p style="text-align: center;"> <chem>Cc1ccc(N)cc1</chem> (1d) + <chem>Cc1ccc(O)cc1</chem> (2a) <math>\xrightarrow[\text{1) air, 16 h; 2) O}_2, 6 \text{ h}]{\text{Pd/C (10 mol\%), p-TsOH (10 mol\%), CPME (1 M), 140^\circ\text{C, reflux}}</math> <chem>Cc1ccc(N(c2ccc(C)cc2)c3ccc(C)cc3)cc1</chem> (6g) </p>                                                                                                                                                                                                                                                                                                                                                                                                                                                                                                                                                                 |                                                              |                                      |              |                   |         |
| <b>METHOD:</b>                                                                                                                                                                                                                                                                                                                                                                                                                                                                                                                                                                                                                                                                                                                                                                                                                                                                   |                                                              |                                      |              |                   |         |
| <p>In a 10 mL round-bottom flask equipped with a magnetic stirrer, Pd/C (10 mol%; 53 mg), TsOH (10 mol%; 8.6 mg), CPME (1 M; 0,5 mL), 3,5-dimethylaniline (<b>1d</b>) (0.5 mmol, 62 <math>\mu</math>L), and 4-methylcyclohexanone (<b>2a</b>) (5 mmol, 0.6 mL) were consecutively added. After 16 hours at 140°C in an open vessel under reflux, a balloon of O<sub>2</sub> was connected, and the reaction was stirred for an additional 6 hours at 140°C. The conversion was evaluated by gas chromatographic analysis. Pd/C was filtered off from the reaction mixture and washed with CPME (10 mL). The pure product was obtained after column chromatography using silica as the stationary phase and ETP as the eluent. After vacuum drying, the pure product 3,5-dimethyl-<i>N,N</i>-di-<i>p</i>-tolylaniline (<b>6g</b>) was obtained with an isolated yield of 66%.</p> |                                                              |                                      |              |                   |         |
| <b>Mol Formula</b>                                                                                                                                                                                                                                                                                                                                                                                                                                                                                                                                                                                                                                                                                                                                                                                                                                                               |                                                              | <b>C<sub>22</sub>H<sub>23</sub>N</b> |              | <b>m.p.</b>       | 93-96°C |
| <b><sup>1</sup>H NMR</b><br><b>400 MHz</b><br><b>CDCl<sub>3</sub></b>                                                                                                                                                                                                                                                                                                                                                                                                                                                                                                                                                                                                                                                                                                                                                                                                            | <b><math>\delta</math> value</b>                             | <b>No. H</b>                         | <b>Mult.</b> | <b>j value/Hz</b> |         |
|                                                                                                                                                                                                                                                                                                                                                                                                                                                                                                                                                                                                                                                                                                                                                                                                                                                                                  | 7.04                                                         | 4                                    | <i>d</i>     | 8.2               |         |
|                                                                                                                                                                                                                                                                                                                                                                                                                                                                                                                                                                                                                                                                                                                                                                                                                                                                                  | 6.96                                                         | 4                                    | <i>d</i>     | 8.2               |         |
|                                                                                                                                                                                                                                                                                                                                                                                                                                                                                                                                                                                                                                                                                                                                                                                                                                                                                  | 6.67                                                         | 2                                    | <i>s</i>     |                   |         |
|                                                                                                                                                                                                                                                                                                                                                                                                                                                                                                                                                                                                                                                                                                                                                                                                                                                                                  | 6.61                                                         | 1                                    | <i>s</i>     |                   |         |
|                                                                                                                                                                                                                                                                                                                                                                                                                                                                                                                                                                                                                                                                                                                                                                                                                                                                                  | 2.31                                                         | 6                                    | <i>s</i>     |                   |         |
|                                                                                                                                                                                                                                                                                                                                                                                                                                                                                                                                                                                                                                                                                                                                                                                                                                                                                  | 2.20                                                         | 6                                    | <i>s</i>     |                   |         |
| <b><sup>13</sup>C NMR (100.6 MHz, CDCl<sub>3</sub>) <math>\delta</math>:</b> 148.27; 145.80; 138.78; 132.06; 129.87; 124.45; 124.02; 121.30; 21.46; 20.94.                                                                                                                                                                                                                                                                                                                                                                                                                                                                                                                                                                                                                                                                                                                       |                                                              |                                      |              |                   |         |
| <b>GC-EIMS (m/z, %):</b> 303 (29); 302 (40); 301 (100); 300 (32); 287 (20); 286 (38); 285 (58); 284 (44); 281 (20); 272 (22); 271 (24); 270 (20); 208 (22); 207 (41); 195 (29); 194 (46); 193 (16); 181 (22); 180 (29); 169 (24); 165 (16); 77 (25); 73 (23); 65 (24); 28 (38).                                                                                                                                                                                                                                                                                                                                                                                                                                                                                                                                                                                                  |                                                              |                                      |              |                   |         |

|                                                                                                                                                                                                                                                                                                                                                                                                                                                                                                                                                                                                                                                                                                                                                                                                                                                                                  |                                                                   |                                      |              |
|----------------------------------------------------------------------------------------------------------------------------------------------------------------------------------------------------------------------------------------------------------------------------------------------------------------------------------------------------------------------------------------------------------------------------------------------------------------------------------------------------------------------------------------------------------------------------------------------------------------------------------------------------------------------------------------------------------------------------------------------------------------------------------------------------------------------------------------------------------------------------------|-------------------------------------------------------------------|--------------------------------------|--------------|
| Chem. Name                                                                                                                                                                                                                                                                                                                                                                                                                                                                                                                                                                                                                                                                                                                                                                                                                                                                       | 4-isopropyl- <i>N,N</i> -di- <i>p</i> -tolylaniline ( <b>6h</b> ) |                                      |              |
| Lit. Ref.                                                                                                                                                                                                                                                                                                                                                                                                                                                                                                                                                                                                                                                                                                                                                                                                                                                                        |                                                                   |                                      |              |
| <p style="text-align: center;"> <chem>CC(C)c1ccc(N)cc1</chem> + <chem>CC1CCCCC1=O</chem> <br/> <math>\xrightarrow[\text{1) air, 24 h; 2) O}_2, 24 \text{ h}]{\text{Pd/C (10 mol\%); p-TsOH (10 mol\%); CPME (1 M); 140}^\circ\text{C, reflux}}</math> <chem>CC(C)c1ccc(N(c2ccc(C)cc2)c3ccc(C)cc3)cc1</chem> </p>                                                                                                                                                                                                                                                                                                                                                                                                                                                                                                                                                                 |                                                                   |                                      |              |
| <b>METHOD:</b>                                                                                                                                                                                                                                                                                                                                                                                                                                                                                                                                                                                                                                                                                                                                                                                                                                                                   |                                                                   |                                      |              |
| <p>In a 10 mL round-bottom flask equipped with a magnetic stirrer, Pd/C (10 mol%; 53 mg), TsOH (10 mol%; 8.6 mg), CPME (1 M; 0.5 mL), 4-isopropyl-aniline (<b>1e</b>) (0.5 mmol, 70 <math>\mu</math>L), and 4-methylcyclohexanone (<b>2a</b>) (5 mmol, 0.6 mL) were consecutively added. After 24 hours at 140°C in an open vessel under reflux, a balloon of O<sub>2</sub> was connected, and the reaction was stirred for an additional 24 hours at 140°C. The conversion was evaluated by gas chromatographic analysis. Pd/C was filtered off from the reaction mixture and washed with CPME (10 mL). The pure product was obtained after column chromatography using silica as the stationary phase and ETP as the eluent. After vacuum drying, the pure product 4-isopropyl-<i>N,N</i>-di-<i>p</i>-tolylaniline (<b>6h</b>) was obtained with an isolated yield of 85%.</p> |                                                                   |                                      |              |
| <b>Mol Formula</b>                                                                                                                                                                                                                                                                                                                                                                                                                                                                                                                                                                                                                                                                                                                                                                                                                                                               |                                                                   | <b>C<sub>23</sub>H<sub>25</sub>N</b> |              |
|                                                                                                                                                                                                                                                                                                                                                                                                                                                                                                                                                                                                                                                                                                                                                                                                                                                                                  |                                                                   | <b>m.p.</b>                          | <b>Oil</b>   |
| <b><sup>1</sup>H NMR</b><br><b>400 MHz</b><br><b>CDCl<sub>3</sub></b>                                                                                                                                                                                                                                                                                                                                                                                                                                                                                                                                                                                                                                                                                                                                                                                                            | <b><math>\delta</math> value</b>                                  | <b>No. H</b>                         | <b>Mult.</b> |
|                                                                                                                                                                                                                                                                                                                                                                                                                                                                                                                                                                                                                                                                                                                                                                                                                                                                                  | 7.10                                                              | 2                                    | <i>d</i>     |
|                                                                                                                                                                                                                                                                                                                                                                                                                                                                                                                                                                                                                                                                                                                                                                                                                                                                                  | 7.08-7.06                                                         | 4                                    | <i>d</i>     |
|                                                                                                                                                                                                                                                                                                                                                                                                                                                                                                                                                                                                                                                                                                                                                                                                                                                                                  | 6.98                                                              | 6                                    | <i>d</i>     |
|                                                                                                                                                                                                                                                                                                                                                                                                                                                                                                                                                                                                                                                                                                                                                                                                                                                                                  | 2.90                                                              | 1                                    | <i>ept</i>   |
|                                                                                                                                                                                                                                                                                                                                                                                                                                                                                                                                                                                                                                                                                                                                                                                                                                                                                  | 2.32                                                              | 6                                    | <i>s</i>     |
|                                                                                                                                                                                                                                                                                                                                                                                                                                                                                                                                                                                                                                                                                                                                                                                                                                                                                  | 1.26                                                              | 6                                    | <i>d</i>     |
| <b><sup>13</sup>C NMR (100.6 MHz, CDCl<sub>3</sub>) <math>\delta</math>:</b> 145.97; 145.83; 142.75; 131.93; 129.86; 127.10; 124.15; 123.56; 33.55; 24.21; 20.91.                                                                                                                                                                                                                                                                                                                                                                                                                                                                                                                                                                                                                                                                                                                |                                                                   |                                      |              |
| <b>GC-EIMS (m/z, %):</b> 316 (17); 315 (100); 301 (16); 300 (94); 192 (15); 190 (16); 180 (18); 92 (16); 91 (28); 65 (21).                                                                                                                                                                                                                                                                                                                                                                                                                                                                                                                                                                                                                                                                                                                                                       |                                                                   |                                      |              |



|                                                                                                                                                                                                                                                                                                                                                                                                                                                                                                                                                                                                                                                                                                                                                                                                                                                                                     |                                                                      |                                   |          |            |         |
|-------------------------------------------------------------------------------------------------------------------------------------------------------------------------------------------------------------------------------------------------------------------------------------------------------------------------------------------------------------------------------------------------------------------------------------------------------------------------------------------------------------------------------------------------------------------------------------------------------------------------------------------------------------------------------------------------------------------------------------------------------------------------------------------------------------------------------------------------------------------------------------|----------------------------------------------------------------------|-----------------------------------|----------|------------|---------|
| Chem. Name                                                                                                                                                                                                                                                                                                                                                                                                                                                                                                                                                                                                                                                                                                                                                                                                                                                                          | 4-(tert-butyl)- <i>N,N</i> -di- <i>p</i> -tolylaniline ( <b>6j</b> ) |                                   |          |            |         |
| Lit. Ref.                                                                                                                                                                                                                                                                                                                                                                                                                                                                                                                                                                                                                                                                                                                                                                                                                                                                           |                                                                      |                                   |          |            |         |
| <p style="text-align: center;"> <chem>CC(C)(C)c1ccc(N)cc1</chem> + <chem>CC1CCCCC1=O</chem> <br/> <math>\xrightarrow[\text{1) air, 24 h; 2) O}_2, 24 \text{ h}]{\text{Pd/C (10 mol\%); p-TsOH (10 mol\%); CPME (1 M); 140}^\circ\text{C, reflux}}</math> <chem>CC(C)(C)c1ccc(N(c2ccc(C)cc2)c3ccc(C)cc3)cc1</chem> </p>                                                                                                                                                                                                                                                                                                                                                                                                                                                                                                                                                              |                                                                      |                                   |          |            |         |
| <b>METHOD:</b>                                                                                                                                                                                                                                                                                                                                                                                                                                                                                                                                                                                                                                                                                                                                                                                                                                                                      |                                                                      |                                   |          |            |         |
| <p>In a 10 mL round-bottom flask equipped with a magnetic stirrer, Pd/C (10 mol%; 53 mg), TsOH (10 mol%; 8.6 mg), CPME (1 M; 0.5 mL), 4-tert-butylaniline (<b>1f</b>) (80 <math>\mu</math>L; 0.5 mmol), and 4-methylcyclohexanone (<b>2a</b>) (5 mmol, 0.6 mL) were consecutively added. After 24 hours at 140°C in an open vessel under reflux, a balloon of O<sub>2</sub> was connected, and the reaction was stirred for an additional 24 hours at 140°C. The conversion was evaluated by gas chromatographic analysis. Pd/C was filtered off from the reaction mixture and washed with CPME (10 mL). The pure product was obtained after column chromatography using silica as the stationary phase and ETP as the eluent. After vacuum drying, the pure product 4-(tert-butyl)-<i>N,N</i>-di-<i>p</i>-tolylaniline (<b>6j</b>) was obtained with an isolated yield of 61%.</p> |                                                                      |                                   |          |            |         |
| Mol Formula                                                                                                                                                                                                                                                                                                                                                                                                                                                                                                                                                                                                                                                                                                                                                                                                                                                                         |                                                                      | C <sub>24</sub> H <sub>27</sub> N |          | m.p.       | 68-71°C |
| <sup>1</sup> H NMR<br>400 MHz<br>CDCl <sub>3</sub>                                                                                                                                                                                                                                                                                                                                                                                                                                                                                                                                                                                                                                                                                                                                                                                                                                  | $\delta$ value                                                       | No. H                             | Mult.    | j value/Hz |         |
|                                                                                                                                                                                                                                                                                                                                                                                                                                                                                                                                                                                                                                                                                                                                                                                                                                                                                     | 7.24                                                                 | 2                                 | <i>d</i> | 8.5        |         |
|                                                                                                                                                                                                                                                                                                                                                                                                                                                                                                                                                                                                                                                                                                                                                                                                                                                                                     | 7.06                                                                 | 4                                 | <i>d</i> | 8.3        |         |
|                                                                                                                                                                                                                                                                                                                                                                                                                                                                                                                                                                                                                                                                                                                                                                                                                                                                                     | 7.011-6.98                                                           | 6                                 | <i>m</i> |            |         |
|                                                                                                                                                                                                                                                                                                                                                                                                                                                                                                                                                                                                                                                                                                                                                                                                                                                                                     | 2.33                                                                 | 6                                 | <i>s</i> |            |         |
|                                                                                                                                                                                                                                                                                                                                                                                                                                                                                                                                                                                                                                                                                                                                                                                                                                                                                     | 1.33                                                                 | 9                                 | <i>s</i> |            |         |
| <sup>13</sup> C NMR (100.6 MHz, CDCl <sub>3</sub> ) $\delta$ : 148.14; 145.91; 145.15; 129.25; 126.19; 124.14; 123.98; 122.45; 31.59, 20.91.                                                                                                                                                                                                                                                                                                                                                                                                                                                                                                                                                                                                                                                                                                                                        |                                                                      |                                   |          |            |         |
| GC-EIMS (m/z, %): 301 (60); 302 (15); 286 (100); 287 (24).                                                                                                                                                                                                                                                                                                                                                                                                                                                                                                                                                                                                                                                                                                                                                                                                                          |                                                                      |                                   |          |            |         |

|                                                                                                                                                                                                                                                                                                                                                                                                                                                                                                                                                                                                                                                                                                                                                                                                                                                                     |                                                       |                                      |              |                   |
|---------------------------------------------------------------------------------------------------------------------------------------------------------------------------------------------------------------------------------------------------------------------------------------------------------------------------------------------------------------------------------------------------------------------------------------------------------------------------------------------------------------------------------------------------------------------------------------------------------------------------------------------------------------------------------------------------------------------------------------------------------------------------------------------------------------------------------------------------------------------|-------------------------------------------------------|--------------------------------------|--------------|-------------------|
| <b>Chem. Name</b>                                                                                                                                                                                                                                                                                                                                                                                                                                                                                                                                                                                                                                                                                                                                                                                                                                                   | <b>4-(tert-butyl)-<i>N,N</i>-diphenylaniline (6k)</b> |                                      |              |                   |
| <b>Lit. Ref.</b>                                                                                                                                                                                                                                                                                                                                                                                                                                                                                                                                                                                                                                                                                                                                                                                                                                                    |                                                       |                                      |              |                   |
| <p style="text-align: center;"> <chem>CC(C)(C)c1ccc(N)cc1</chem> + <chem>O=C1CCCCC1</chem> <span style="margin-left: 100px;"> <b>Pd/C (10 mol%)</b><br/> <b>p-TsOH (10 mol%)</b><br/> <b>CPME (1 M)</b> </span> <span style="margin-left: 100px;"> <math>\xrightarrow{140^\circ\text{C, reflux}}</math><br/> <b>1) air, 24 h</b><br/> <b>2) O<sub>2</sub>, 24 h</b> </span> <span style="margin-left: 100px;"> <chem>CC(C)(C)c1ccc(N(c2ccccc2)c3ccccc13)cc1</chem> </span> </p>                                                                                                                                                                                                                                                                                                                                                                                     |                                                       |                                      |              |                   |
| <b>METHOD:</b>                                                                                                                                                                                                                                                                                                                                                                                                                                                                                                                                                                                                                                                                                                                                                                                                                                                      |                                                       |                                      |              |                   |
| <p>In a 10 mL round-bottom flask equipped with a magnetic stirrer, Pd/C (10 mol%; 53 mg), TsOH (10 mol%; 8.6 mg), CPME (1 M; 0,5 mL), 4-tert-buthylaniline (<b>1f</b>) (80 <math>\mu</math>L; 0.5 mmol), and cyclohexanone (<b>2b</b>) (5 mmol, 0.5 mL) were consecutively added. After 24 hours at 140°C in an open vessel under reflux, a balloon of O<sub>2</sub> was connected, and the reaction was stirred for an additional 24 hours at 140°C. The conversion was evaluated by gas chromatographic analysis. Pd/C was filtered off from the reaction mixture and washed with CPME (10 mL). The pure product was obtained after column chromatography using silica as the stationary phase and ETP as the eluent. After vacuum drying, the pure product 4-(tert-butyl)-<i>N,N</i>-diphenylaniline (<b>6k</b>) was obtained with an isolated yield of 55%.</p> |                                                       |                                      |              |                   |
| <b>Mol Formula</b>                                                                                                                                                                                                                                                                                                                                                                                                                                                                                                                                                                                                                                                                                                                                                                                                                                                  |                                                       | <b>C<sub>22</sub>H<sub>23</sub>N</b> |              | <b>m.p.</b>       |
|                                                                                                                                                                                                                                                                                                                                                                                                                                                                                                                                                                                                                                                                                                                                                                                                                                                                     |                                                       |                                      |              | 68-71°C           |
| <b><sup>1</sup>H NMR</b><br><b>400 MHz</b><br><b>CDCl<sub>3</sub></b>                                                                                                                                                                                                                                                                                                                                                                                                                                                                                                                                                                                                                                                                                                                                                                                               | <b><math>\delta</math> value</b>                      | <b>No. H</b>                         | <b>Mult.</b> | <b>j value/Hz</b> |
|                                                                                                                                                                                                                                                                                                                                                                                                                                                                                                                                                                                                                                                                                                                                                                                                                                                                     | 7.25-7.21                                             | 5                                    | <i>m</i>     |                   |
|                                                                                                                                                                                                                                                                                                                                                                                                                                                                                                                                                                                                                                                                                                                                                                                                                                                                     | 7.08                                                  | 4                                    | <i>d</i>     | 7.8               |
|                                                                                                                                                                                                                                                                                                                                                                                                                                                                                                                                                                                                                                                                                                                                                                                                                                                                     | 7.03-6.96                                             | 5                                    | <i>m</i>     |                   |
|                                                                                                                                                                                                                                                                                                                                                                                                                                                                                                                                                                                                                                                                                                                                                                                                                                                                     | 1.33                                                  | 9                                    | <i>s</i>     |                   |
| <b><sup>13</sup>C NMR (100.6 MHz, CDCl<sub>3</sub>) <math>\delta</math>: 148.14;145.90; 145.15; 129.25;126.19; 124.14; 123.98; 122.45; 31.58.</b>                                                                                                                                                                                                                                                                                                                                                                                                                                                                                                                                                                                                                                                                                                                   |                                                       |                                      |              |                   |
| <b>GC-EIMS (m/z, %): 301 (60); 302 (15); 286 (100); 287 (24).</b>                                                                                                                                                                                                                                                                                                                                                                                                                                                                                                                                                                                                                                                                                                                                                                                                   |                                                       |                                      |              |                   |



|                                                                                                                                                                                                                                                                                                                                                                                                                                                                                                                                                                                                                                                                                                                                                                                                                                                               |                                                                                                         |                                    |              |                   |
|---------------------------------------------------------------------------------------------------------------------------------------------------------------------------------------------------------------------------------------------------------------------------------------------------------------------------------------------------------------------------------------------------------------------------------------------------------------------------------------------------------------------------------------------------------------------------------------------------------------------------------------------------------------------------------------------------------------------------------------------------------------------------------------------------------------------------------------------------------------|---------------------------------------------------------------------------------------------------------|------------------------------------|--------------|-------------------|
| <b>Chem. Name</b>                                                                                                                                                                                                                                                                                                                                                                                                                                                                                                                                                                                                                                                                                                                                                                                                                                             | <b>4-methoxy-<i>N,N</i>-di-<i>p</i>-tolylaniline (6m)</b>                                               |                                    |              |                   |
| <b>Lit. Ref.</b>                                                                                                                                                                                                                                                                                                                                                                                                                                                                                                                                                                                                                                                                                                                                                                                                                                              | Ganesh M. Kumbhar, Ajit H. Deshmukh, Sanjay S. Chavan, <i>J. Org. Chem.</i> 2024, <b>1021</b> , 123351. |                                    |              |                   |
| <p style="text-align: center;"> <chem>Cc1ccc(N)cc1</chem> (1g) + <chem>Cc1ccc(C(=O)CC1)cc1</chem> (2a) <math>\xrightarrow[\text{1) air, 24 h; 2) O}_2, 24 \text{ h}]{\text{Pd/C (10 mol\%); p-TsOH (10 mol\%); CPME (1 M); 140}^\circ\text{C, reflux}}</math> <chem>Cc1ccc(N(c2ccc(C)cc2)c3ccc(OC)cc3)cc1</chem> (6m) </p>                                                                                                                                                                                                                                                                                                                                                                                                                                                                                                                                    |                                                                                                         |                                    |              |                   |
| <b>METHOD:</b>                                                                                                                                                                                                                                                                                                                                                                                                                                                                                                                                                                                                                                                                                                                                                                                                                                                |                                                                                                         |                                    |              |                   |
| <p>In a 10 mL round-bottom flask equipped with a magnetic stirrer, Pd/C (10 mol%; 53 mg), TsOH (10 mol%; 8.6 mg), CPME (1 M; 0.5 mL), <i>p</i>-anisidine (<b>1g</b>) (0.5 mmol, 62 mg), and 4-methylcyclohexanone (<b>2a</b>) (5 mmol, 0.6 mL) were consecutively added. After 16 hours at 140°C in an open vessel under reflux, a balloon of O<sub>2</sub> was connected, and the reaction was stirred for an additional 6 hours at 140°C. The conversion was evaluated by gas chromatographic analysis. Pd/C was filtered off from the reaction mixture and washed with CPME (10 mL). The pure product was obtained after column chromatography using silica as the stationary phase and ETP as the eluent. After vacuum drying, the pure product 4-methoxy-<i>N,N</i>-di-<i>p</i>-tolylaniline (<b>6m</b>) was obtained with an isolated yield of 72%.</p> |                                                                                                         |                                    |              |                   |
| <b>Mol Formula</b>                                                                                                                                                                                                                                                                                                                                                                                                                                                                                                                                                                                                                                                                                                                                                                                                                                            |                                                                                                         | C <sub>21</sub> H <sub>21</sub> NO |              |                   |
| <b>m.p.</b>                                                                                                                                                                                                                                                                                                                                                                                                                                                                                                                                                                                                                                                                                                                                                                                                                                                   |                                                                                                         | 70-72°C                            |              |                   |
| <b><sup>1</sup>H NMR</b><br>400 MHz<br>CDCl <sub>3</sub>                                                                                                                                                                                                                                                                                                                                                                                                                                                                                                                                                                                                                                                                                                                                                                                                      | <b>δ value</b>                                                                                          | <b>No. H</b>                       | <b>Mult.</b> | <b>j value/Hz</b> |
|                                                                                                                                                                                                                                                                                                                                                                                                                                                                                                                                                                                                                                                                                                                                                                                                                                                               | 7.04-7.01                                                                                               | 6                                  | <i>m</i>     |                   |
|                                                                                                                                                                                                                                                                                                                                                                                                                                                                                                                                                                                                                                                                                                                                                                                                                                                               | 6.92                                                                                                    | 4                                  | <i>d</i>     | 8.1               |
|                                                                                                                                                                                                                                                                                                                                                                                                                                                                                                                                                                                                                                                                                                                                                                                                                                                               | 6.81                                                                                                    | 2                                  | <i>d</i>     | 8.1               |
|                                                                                                                                                                                                                                                                                                                                                                                                                                                                                                                                                                                                                                                                                                                                                                                                                                                               | 3.79                                                                                                    | 3                                  | <i>s</i>     |                   |
|                                                                                                                                                                                                                                                                                                                                                                                                                                                                                                                                                                                                                                                                                                                                                                                                                                                               | 2.29                                                                                                    | 6                                  | <i>s</i>     |                   |
| <b><sup>13</sup>C NMR (100.6 MHz, CDCl<sub>3</sub>) δ:</b> 155.74; 146.07; 141.47; 131.39; 129.80; 126.56; 123.20; 114.73; 55.62; 20.85                                                                                                                                                                                                                                                                                                                                                                                                                                                                                                                                                                                                                                                                                                                       |                                                                                                         |                                    |              |                   |
| <b>GC-EIMS (m/z, %):</b> 304 (79); 303 (100); 289 (55); 288 (100); 152 (20); 91 (19); 65 (20).                                                                                                                                                                                                                                                                                                                                                                                                                                                                                                                                                                                                                                                                                                                                                                |                                                                                                         |                                    |              |                   |

|                                                                                                                                                                                                                                                                                                                                                                                                                                                                                                                                                                                                                                                                                                                                                                                                                                                           |                                                          |                                       |              |
|-----------------------------------------------------------------------------------------------------------------------------------------------------------------------------------------------------------------------------------------------------------------------------------------------------------------------------------------------------------------------------------------------------------------------------------------------------------------------------------------------------------------------------------------------------------------------------------------------------------------------------------------------------------------------------------------------------------------------------------------------------------------------------------------------------------------------------------------------------------|----------------------------------------------------------|---------------------------------------|--------------|
| <b>Chem. Name</b>                                                                                                                                                                                                                                                                                                                                                                                                                                                                                                                                                                                                                                                                                                                                                                                                                                         | <b>4-fluoro-<i>N,N</i>-di-<i>p</i>-tolylaniline (6n)</b> |                                       |              |
| <b>Lit. Ref.</b>                                                                                                                                                                                                                                                                                                                                                                                                                                                                                                                                                                                                                                                                                                                                                                                                                                          |                                                          |                                       |              |
| <p style="text-align: center;"> <chem>Nc1ccc(F)cc1</chem> (1h) + <chem>CC1CCC(CC1)C(=O)C</chem> (2a) <math>\xrightarrow[\text{1) air, 24 h; 2) O}_2, 24 \text{ h}]{\text{Pd/C (10 mol\%); p-TsOH (10 mol\%); CPME (1 M); 140}^\circ\text{C, reflux}}</math> <chem>Cc1ccc(N(c2ccc(F)cc2)c3ccc(C)cc3)cc1</chem> (6n) </p>                                                                                                                                                                                                                                                                                                                                                                                                                                                                                                                                   |                                                          |                                       |              |
| <b>METHOD:</b>                                                                                                                                                                                                                                                                                                                                                                                                                                                                                                                                                                                                                                                                                                                                                                                                                                            |                                                          |                                       |              |
| <p>In a 10 mL round-bottom flask equipped with a magnetic stirrer, Pd/C (10 mol%; 53 mg), TsOH (10 mol%; 8.6 mg), CPME (1 M; 0,5 mL), <i>p</i>-fluoroaniline (<b>1h</b>) (0.5 mmol, 56 mg), and 4-methylcyclohexanone (<b>2a</b>) (5 mmol, 0.6 mL) were consecutively added. After 24 hours at 140°C in an open vessel under reflux, a balloon of O<sub>2</sub> was connected, and the reaction was stirred for an additional 24 hours at 140°C. The conversion was evaluated by gas chromatographic analysis. Pd/C was filtered off from the reaction mixture and washed with CPME (10 mL). The pure product was obtained after column chromatography using silica as the stationary phase and ETP as the eluent. After vacuum drying, the pure 4-fluoro-<i>N,N</i>-di-<i>p</i>-tolylaniline (<b>6n</b>) was obtained with an isolated yield of 62%.</p> |                                                          |                                       |              |
| <b>Mol Formula</b>                                                                                                                                                                                                                                                                                                                                                                                                                                                                                                                                                                                                                                                                                                                                                                                                                                        |                                                          | <b>C<sub>20</sub>H<sub>18</sub>FN</b> |              |
| <b>m.p.</b>                                                                                                                                                                                                                                                                                                                                                                                                                                                                                                                                                                                                                                                                                                                                                                                                                                               |                                                          | <b>80-82°C</b>                        |              |
| <b><sup>1</sup>H NMR</b><br><b>400 MHz</b><br><b>CDCl<sub>3</sub></b>                                                                                                                                                                                                                                                                                                                                                                                                                                                                                                                                                                                                                                                                                                                                                                                     | <b>δ value</b>                                           | <b>No. H</b>                          | <b>Mult.</b> |
|                                                                                                                                                                                                                                                                                                                                                                                                                                                                                                                                                                                                                                                                                                                                                                                                                                                           | 7.05                                                     | 4                                     | <i>d</i>     |
|                                                                                                                                                                                                                                                                                                                                                                                                                                                                                                                                                                                                                                                                                                                                                                                                                                                           | 7.03-7.00                                                | 2                                     | <i>m</i>     |
|                                                                                                                                                                                                                                                                                                                                                                                                                                                                                                                                                                                                                                                                                                                                                                                                                                                           | 6.95-6.90                                                | 6                                     | <i>m</i>     |
|                                                                                                                                                                                                                                                                                                                                                                                                                                                                                                                                                                                                                                                                                                                                                                                                                                                           | 2.30                                                     | 6                                     | <i>s</i>     |
| <b><sup>13</sup>C NMR (100.6 MHz, CDCl<sub>3</sub>) δ:</b> 159.73; 157.33; 145.72; 144.49; 144.46; 132.20; 129.98; 125.50; 125.42; 123.90; 116.06; 115.84; 20.89.                                                                                                                                                                                                                                                                                                                                                                                                                                                                                                                                                                                                                                                                                         |                                                          |                                       |              |
| <b><sup>19</sup>F NMR (100.6 MHz, CDCl<sub>3</sub>) δ:</b> -120.98.                                                                                                                                                                                                                                                                                                                                                                                                                                                                                                                                                                                                                                                                                                                                                                                       |                                                          |                                       |              |
| <b>GC-EIMS (m/z, %):</b> 292 (20); 291 (100); 290 (19); 240 (25); 91 (23); 65 (24).                                                                                                                                                                                                                                                                                                                                                                                                                                                                                                                                                                                                                                                                                                                                                                       |                                                          |                                       |              |

|                                                                                                                                                                                                                                                                                                                                                                                                                                                                                                                                                                                                                                                                                                                                                                                                                                   |                                                                                                               |                                    |              |
|-----------------------------------------------------------------------------------------------------------------------------------------------------------------------------------------------------------------------------------------------------------------------------------------------------------------------------------------------------------------------------------------------------------------------------------------------------------------------------------------------------------------------------------------------------------------------------------------------------------------------------------------------------------------------------------------------------------------------------------------------------------------------------------------------------------------------------------|---------------------------------------------------------------------------------------------------------------|------------------------------------|--------------|
| <b>Chem. Name</b>                                                                                                                                                                                                                                                                                                                                                                                                                                                                                                                                                                                                                                                                                                                                                                                                                 | <b>4-fluoro-<i>N,N</i>-diphenylaniline (6o)</b>                                                               |                                    |              |
| <b>Lit. Ref.</b>                                                                                                                                                                                                                                                                                                                                                                                                                                                                                                                                                                                                                                                                                                                                                                                                                  | Sachin G. Modha, Mihai V. Popescu and Michael F. Greaney, <i>J. Org. Chem.</i> 2017, <b>82</b> , 11933-11938. |                                    |              |
| <p style="text-align: center;"> <chem>Nc1ccc(F)cc1</chem> (1h) + <chem>O=C1CCCCC1</chem> (2b) <math>\xrightarrow[\text{1) air, 24h; 2) O}_2, 24\text{ h}]{\text{Pd/C (10 mol\%); p-TsOH (10 mol\%); CPME (1 M); 140}^\circ\text{C, reflux}}</math> <chem>Fc1ccc(N(c2ccccc2)c3ccccc13)cc1</chem> (6o) </p>                                                                                                                                                                                                                                                                                                                                                                                                                                                                                                                         |                                                                                                               |                                    |              |
| <b>METHOD:</b>                                                                                                                                                                                                                                                                                                                                                                                                                                                                                                                                                                                                                                                                                                                                                                                                                    |                                                                                                               |                                    |              |
| <p>In a 10 mL round-bottom flask equipped with a magnetic stirrer, Pd/C (10 mol%; 53 mg), TsOH (10 mol%; 8.6 mg), CPME (1 M; 0,5 mL), p-fluoroaniline (<b>1h</b>) (0.5 mmol, 56 mg), and cyclohexanone (<b>2b</b>) (5 mmol, 0.5 mL) were consecutively added. After 24 hours at 140°C in an open vessel under reflux, a balloon of O<sub>2</sub> was connected, and the reaction was stirred for an additional 24 hours at 140°C. The conversion was evaluated by gas chromatographic analysis. Pd/C was filtered off from the reaction mixture and washed with CPME (10 mL). The pure product was obtained after column chromatography using silica as the stationary phase and ETP as the eluent. After vacuum drying, the pure 4-fluoro-<i>N,N</i>-diphenylaniline (<b>6o</b>) was obtained with an isolated yield of 75%.</p> |                                                                                                               |                                    |              |
| <b>Mol Formula</b>                                                                                                                                                                                                                                                                                                                                                                                                                                                                                                                                                                                                                                                                                                                                                                                                                |                                                                                                               | C <sub>18</sub> H <sub>14</sub> FN |              |
| <b>m.p.</b>                                                                                                                                                                                                                                                                                                                                                                                                                                                                                                                                                                                                                                                                                                                                                                                                                       |                                                                                                               | Oil                                |              |
| <b><sup>1</sup>H NMR</b><br>400 MHz<br>CDCl <sub>3</sub>                                                                                                                                                                                                                                                                                                                                                                                                                                                                                                                                                                                                                                                                                                                                                                          | <b>δ value</b>                                                                                                | <b>No. H</b>                       | <b>Mult.</b> |
|                                                                                                                                                                                                                                                                                                                                                                                                                                                                                                                                                                                                                                                                                                                                                                                                                                   | 7.23                                                                                                          | 4                                  | <i>t</i>     |
|                                                                                                                                                                                                                                                                                                                                                                                                                                                                                                                                                                                                                                                                                                                                                                                                                                   | 7.08-7.03                                                                                                     | 6                                  | <i>m</i>     |
|                                                                                                                                                                                                                                                                                                                                                                                                                                                                                                                                                                                                                                                                                                                                                                                                                                   | 7.01-6.94                                                                                                     | 4                                  | <i>m</i>     |
| <b><sup>13</sup>C NMR (100.6 MHz, CDCl<sub>3</sub>) δ:</b> 160.26; 157.85; 148.03; 144.03; 129.38; 126.61; 123.67; 122.65; 116.31; 116.09                                                                                                                                                                                                                                                                                                                                                                                                                                                                                                                                                                                                                                                                                         |                                                                                                               |                                    |              |
| <b><sup>19</sup>F NMR (100.6 MHz, CDCl<sub>3</sub>) δ:</b> -119.72.                                                                                                                                                                                                                                                                                                                                                                                                                                                                                                                                                                                                                                                                                                                                                               |                                                                                                               |                                    |              |
| <b>GC-EIMS (m/z, %):</b> 264 (90); 263 (100); 262 (100); 185 (47); 184 (31); 167 (23); 166 (26); 160 (16); 159 (19); 77 (22); 51 (25).                                                                                                                                                                                                                                                                                                                                                                                                                                                                                                                                                                                                                                                                                            |                                                                                                               |                                    |              |



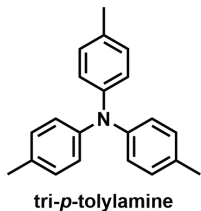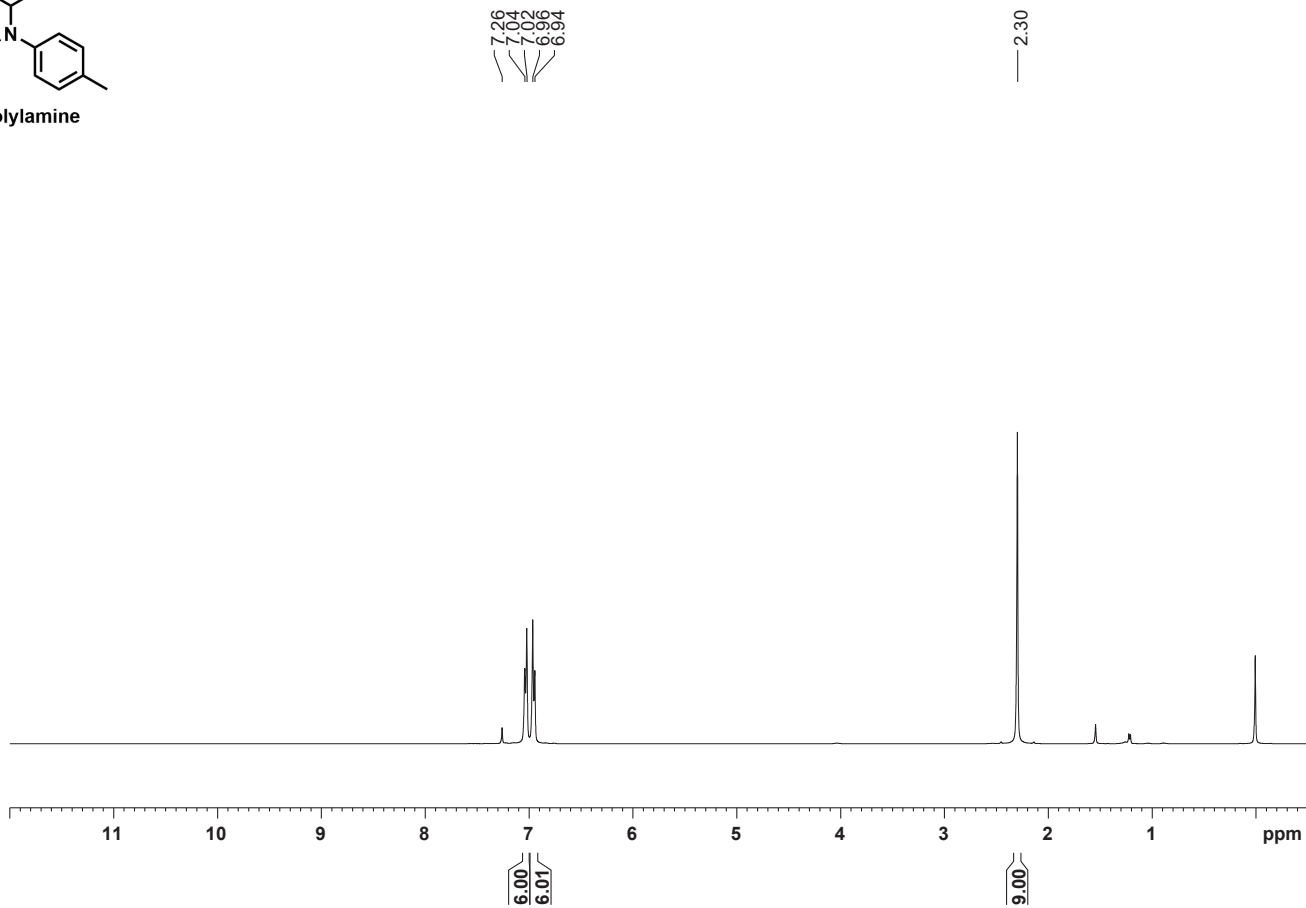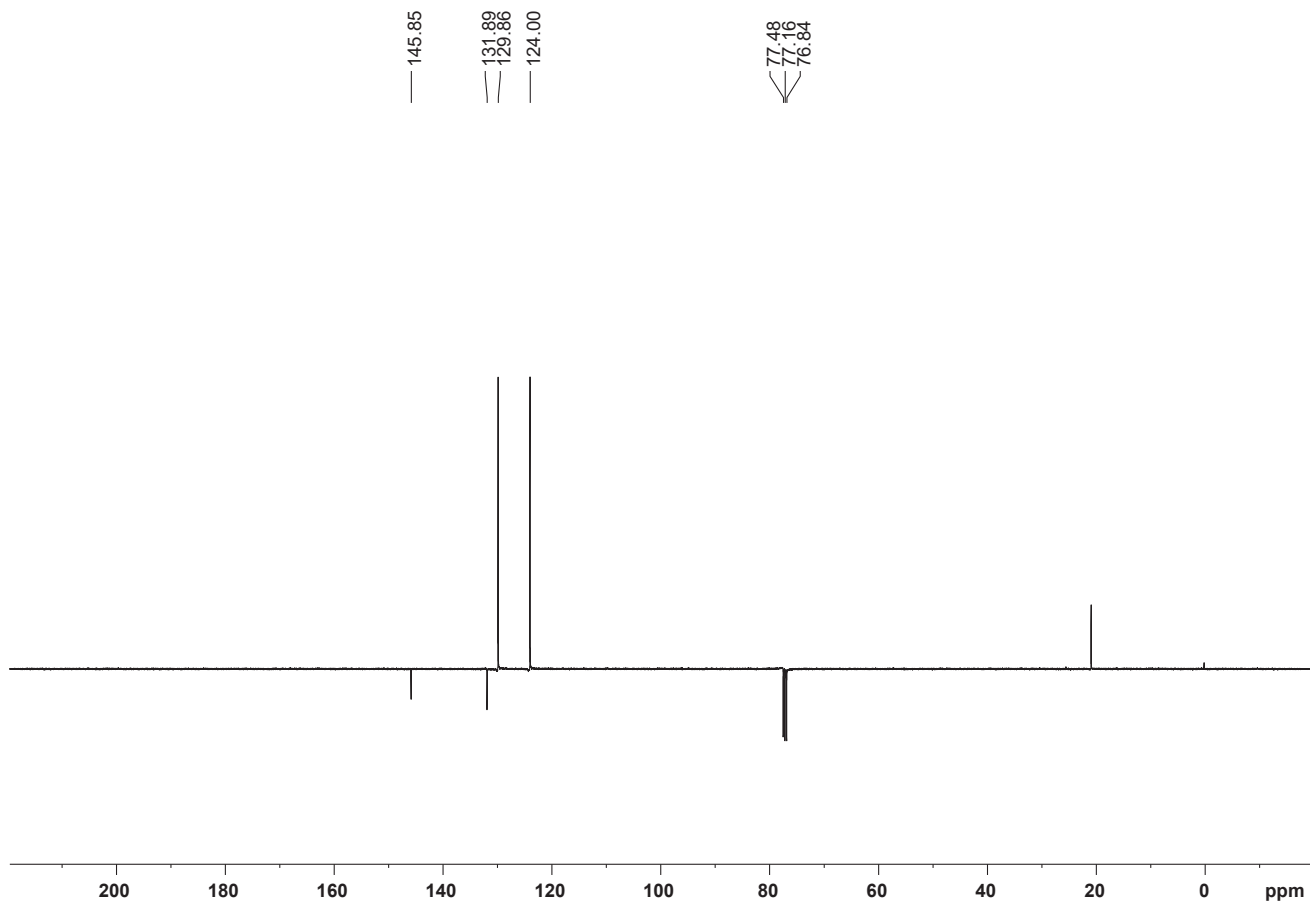

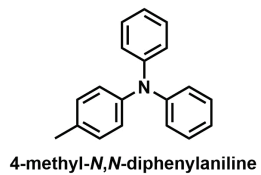

7.26  
7.24  
7.22  
7.20  
7.19  
7.107  
7.07  
7.05  
7.02  
6.99  
6.97  
6.95

—2.32

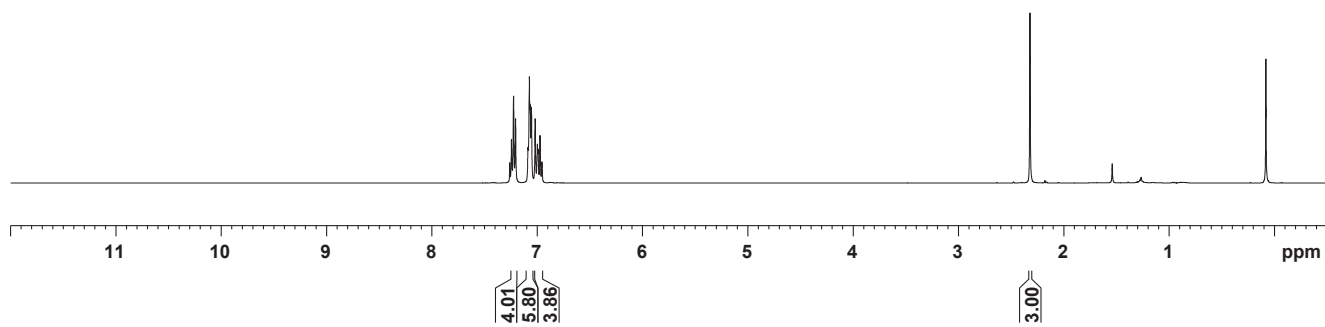

148.19  
145.40  
132.89  
130.06  
129.25  
125.09  
123.75  
122.36

77.48  
77.16  
76.84

—20.97

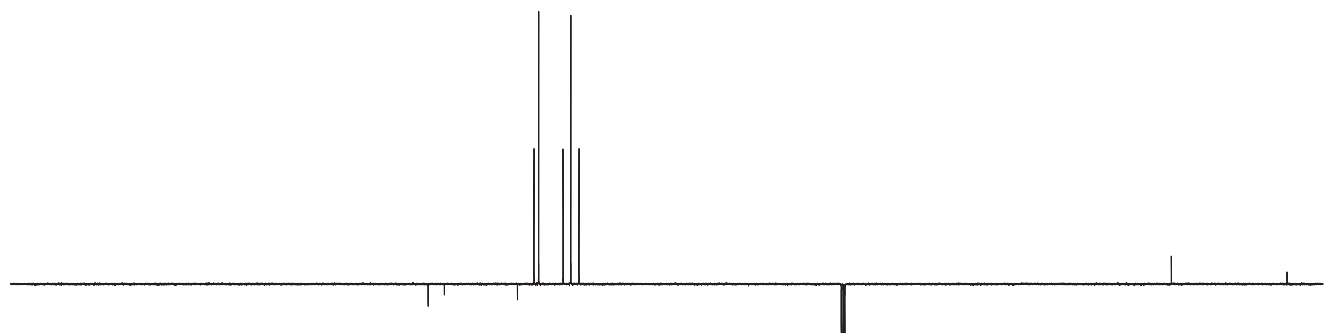

210 200 190 180 170 160 150 140 130 120 110 100 90 80 70 60 50 40 30 20 10 ppm

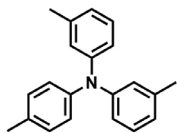

3-methyl-N-(m-tolyl)-N-(p-tolyl)aniline

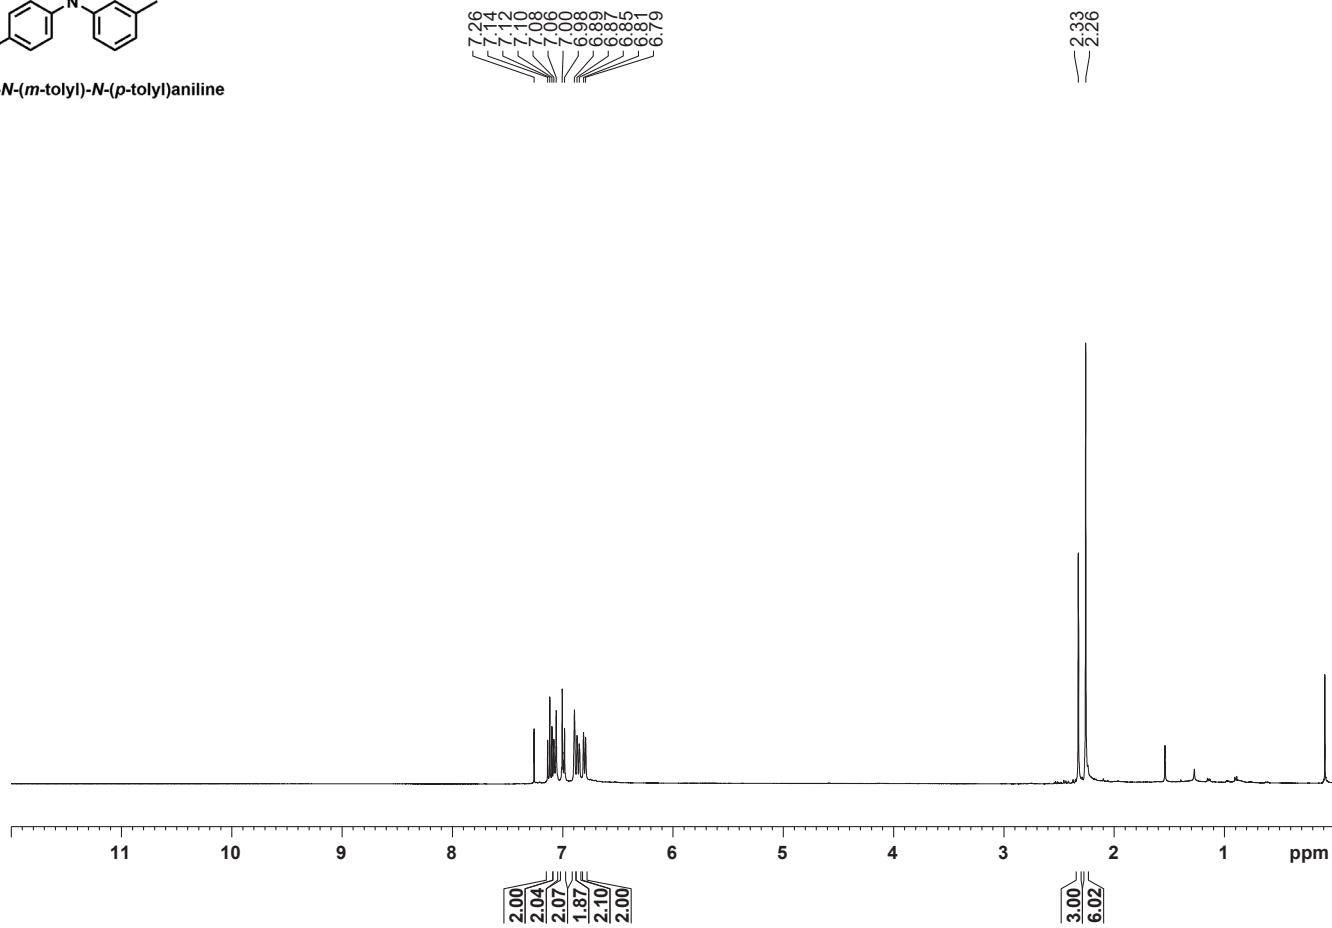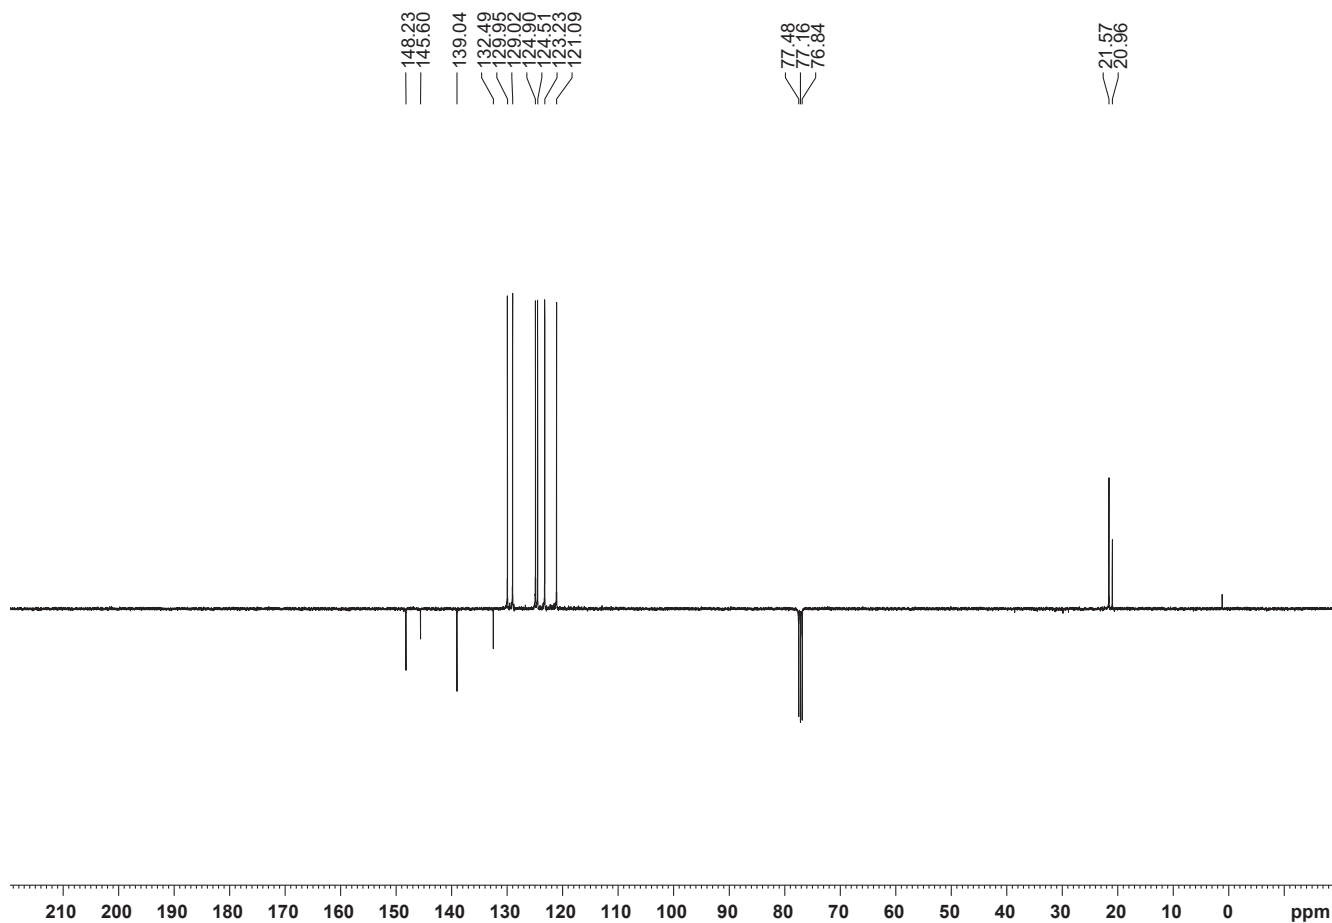

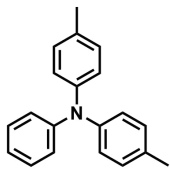

4-methyl-N-phenyl-N-(p-tolyl)aniline

7.26  
7.22  
7.20  
7.18  
7.17  
7.16  
7.14  
7.10  
7.09  
7.09  
7.09  
7.09  
7.09

—2.31

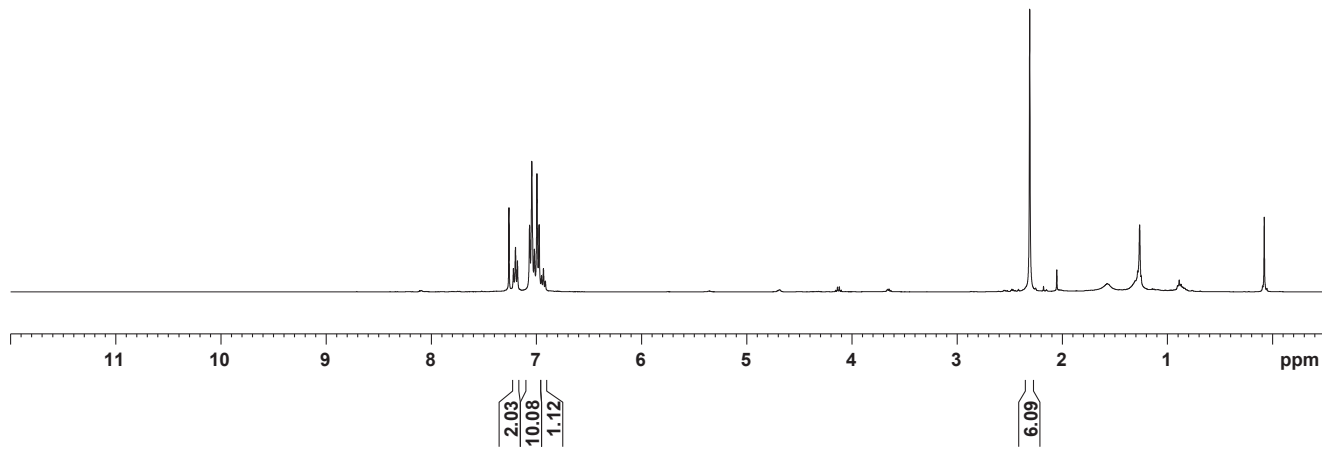

148.41  
145.59

132.43  
129.96  
129.15  
124.59  
123.08  
121.83

77.48  
77.16  
76.84

—20.93

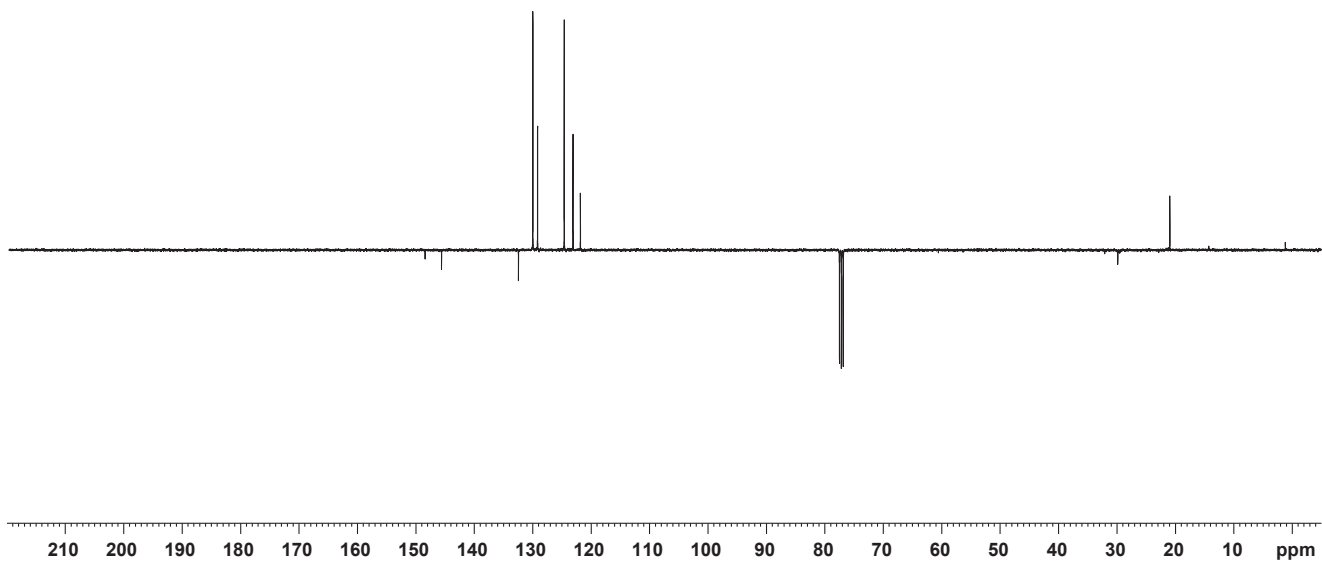

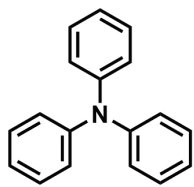

triphenylamine

7.29  
7.27  
7.25  
7.20  
7.08  
7.00  
6.98

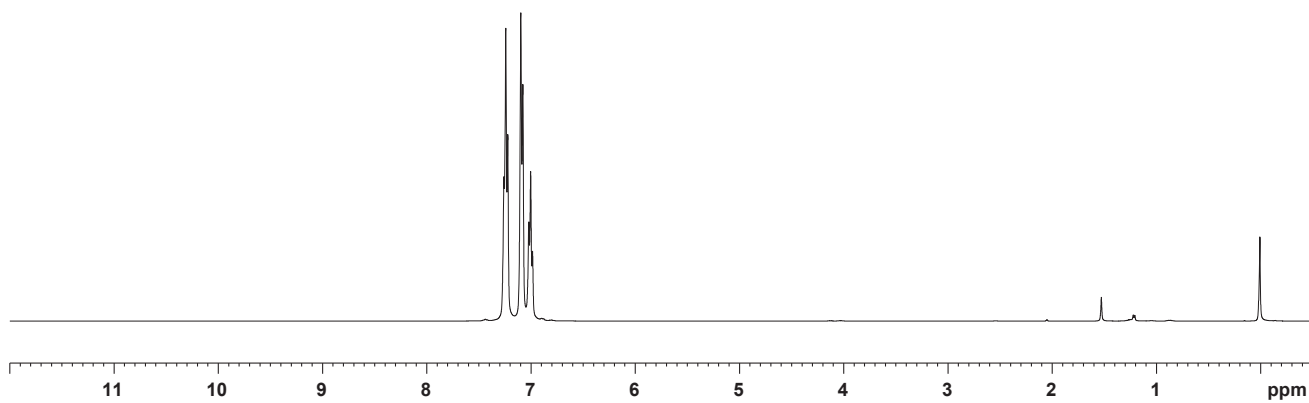

148.00  
129.33  
124.30  
122.80  
77.47  
77.16  
76.84

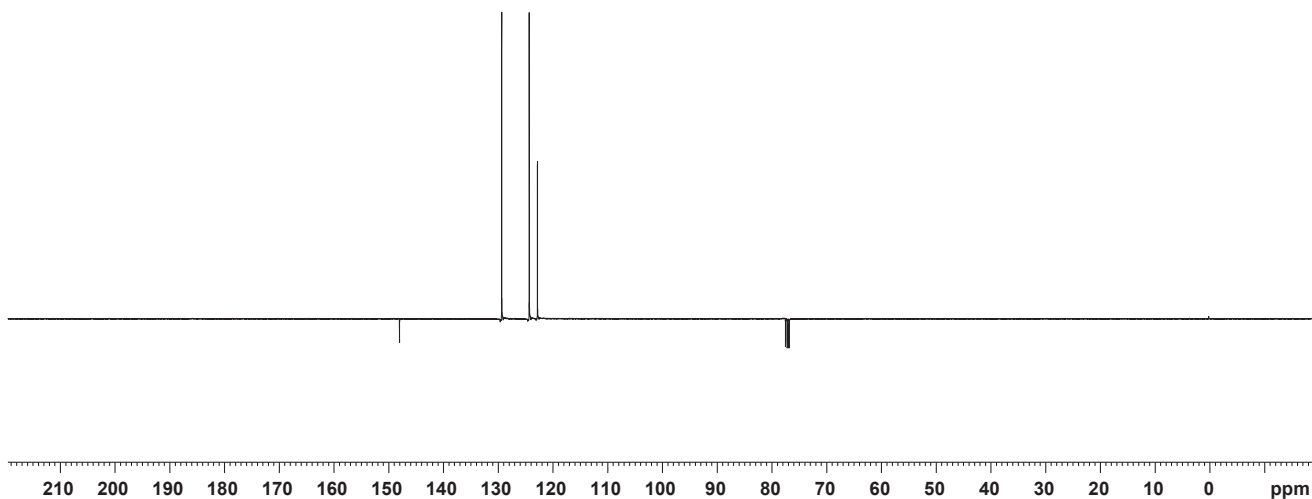

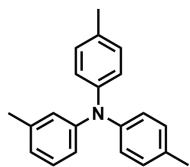

3-methyl-N,N-di-p-tolylaniline

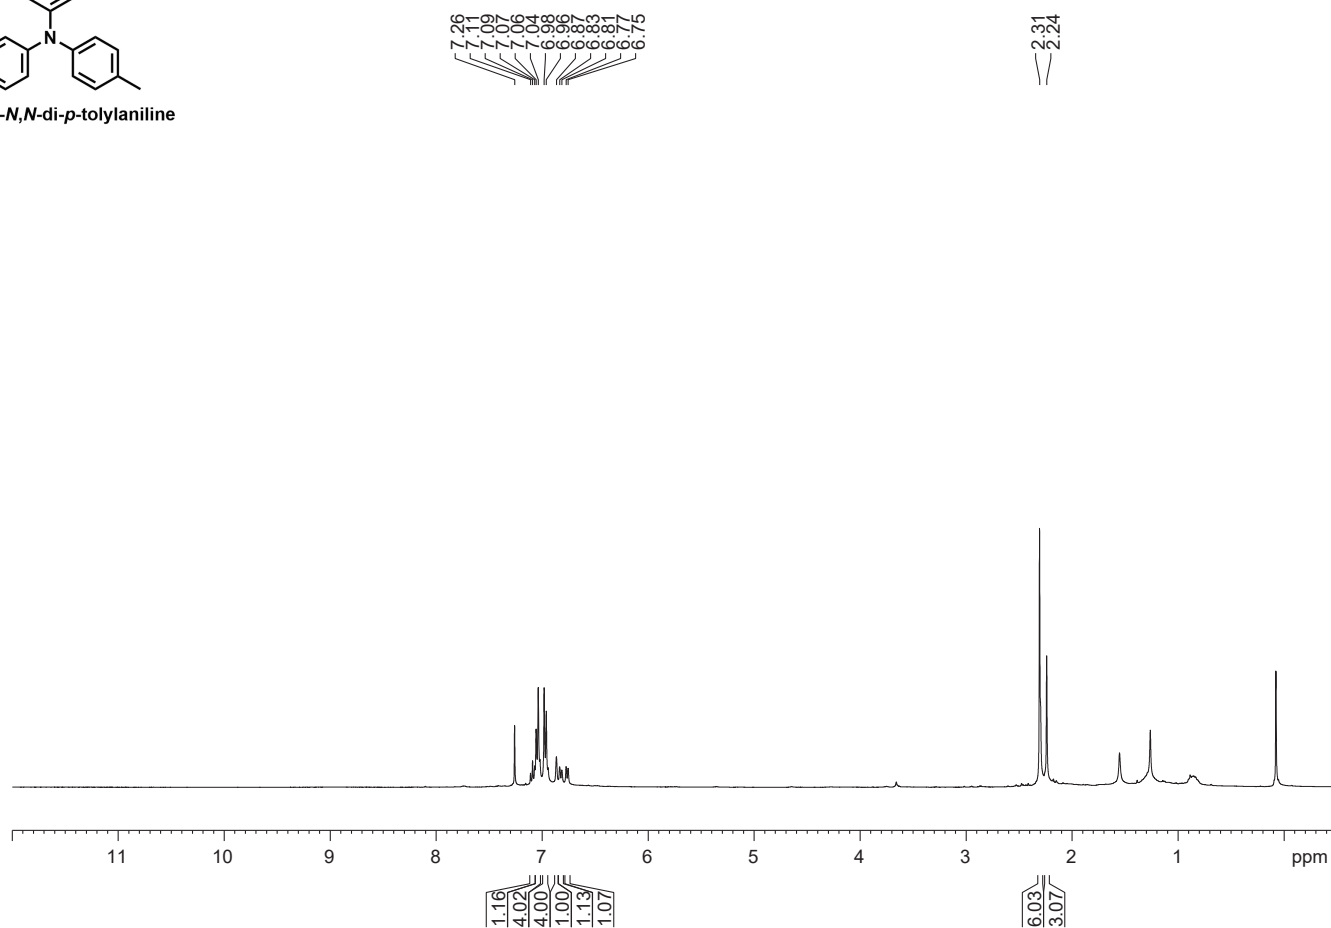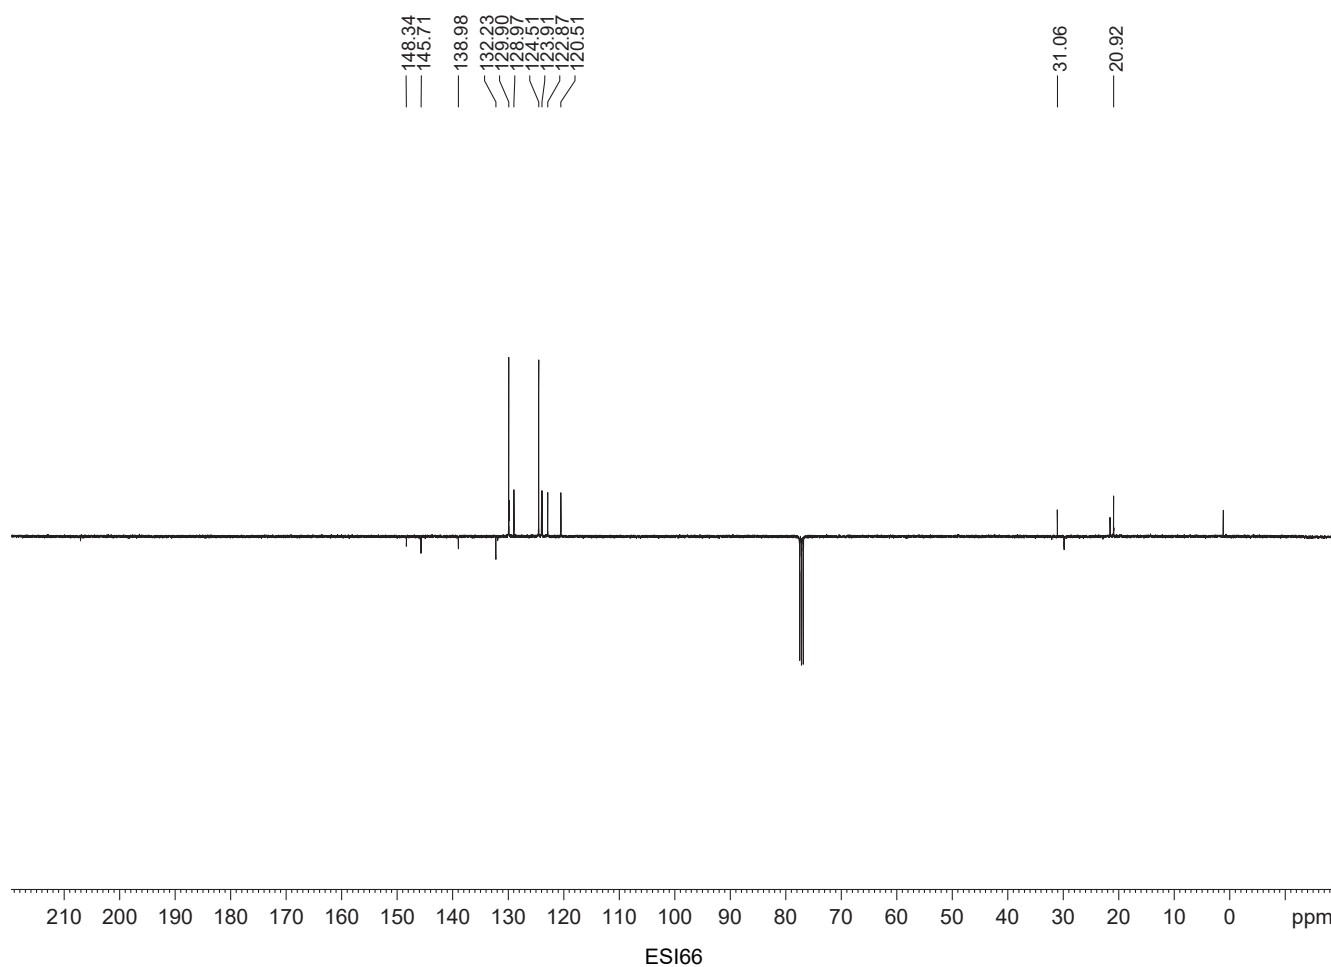

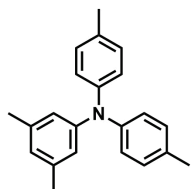

3,5-dimethyl-N,N-di-p-tolylaniline

7.26  
7.05  
7.03  
6.97  
6.95  
6.91

2.31  
2.20

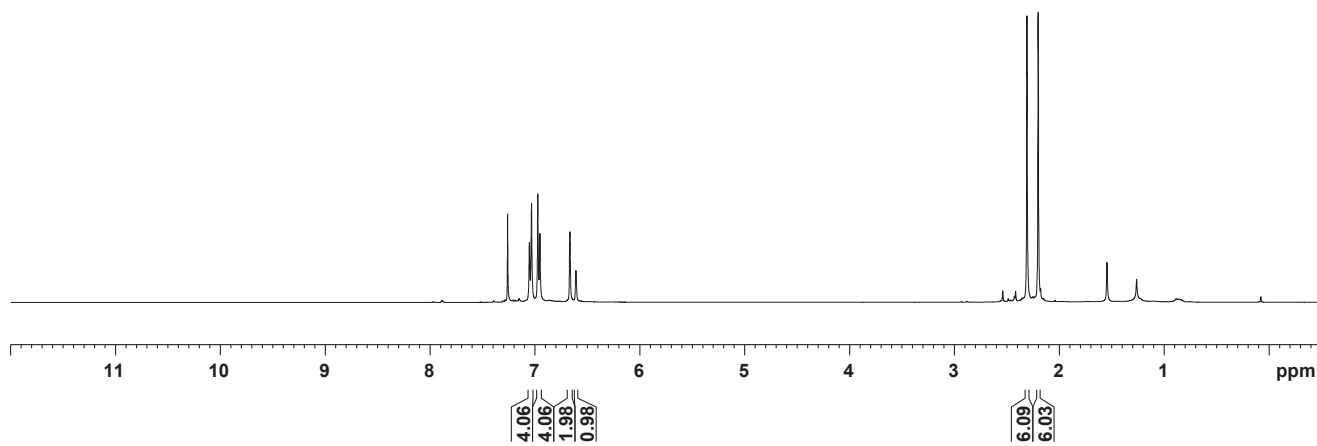

148.27  
145.80  
138.78  
132.06  
129.87  
124.45  
124.02  
121.30

77.48  
77.16  
76.84

21.46  
20.94

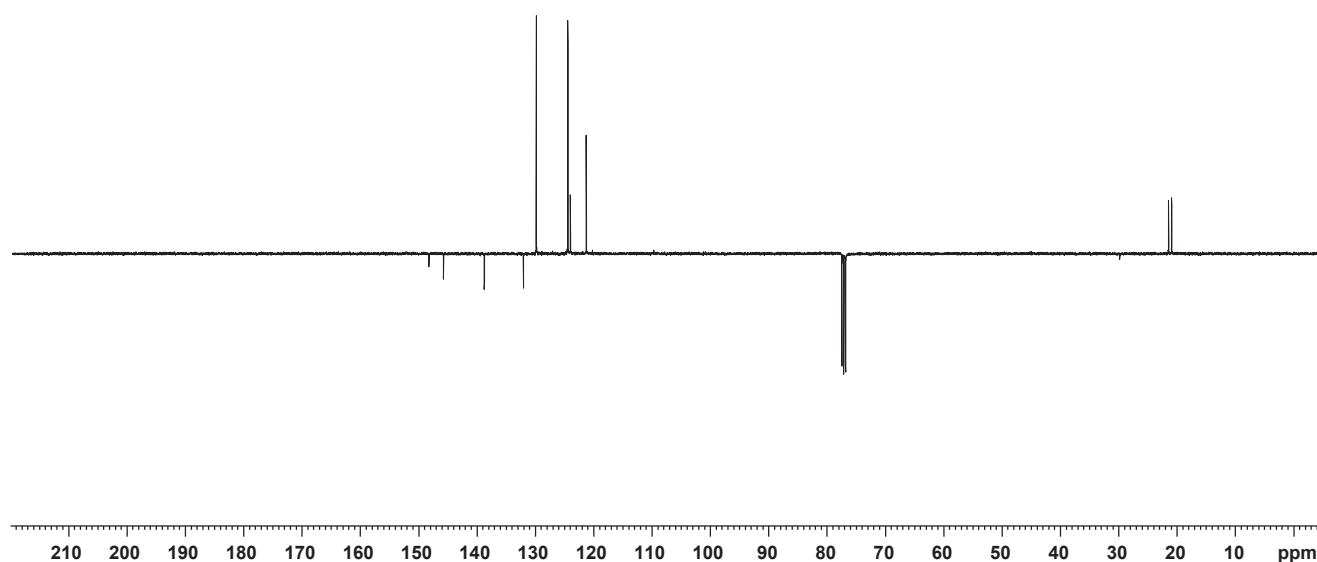

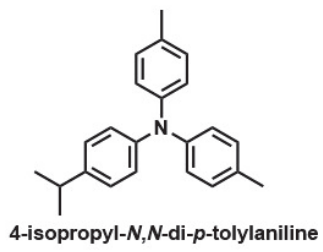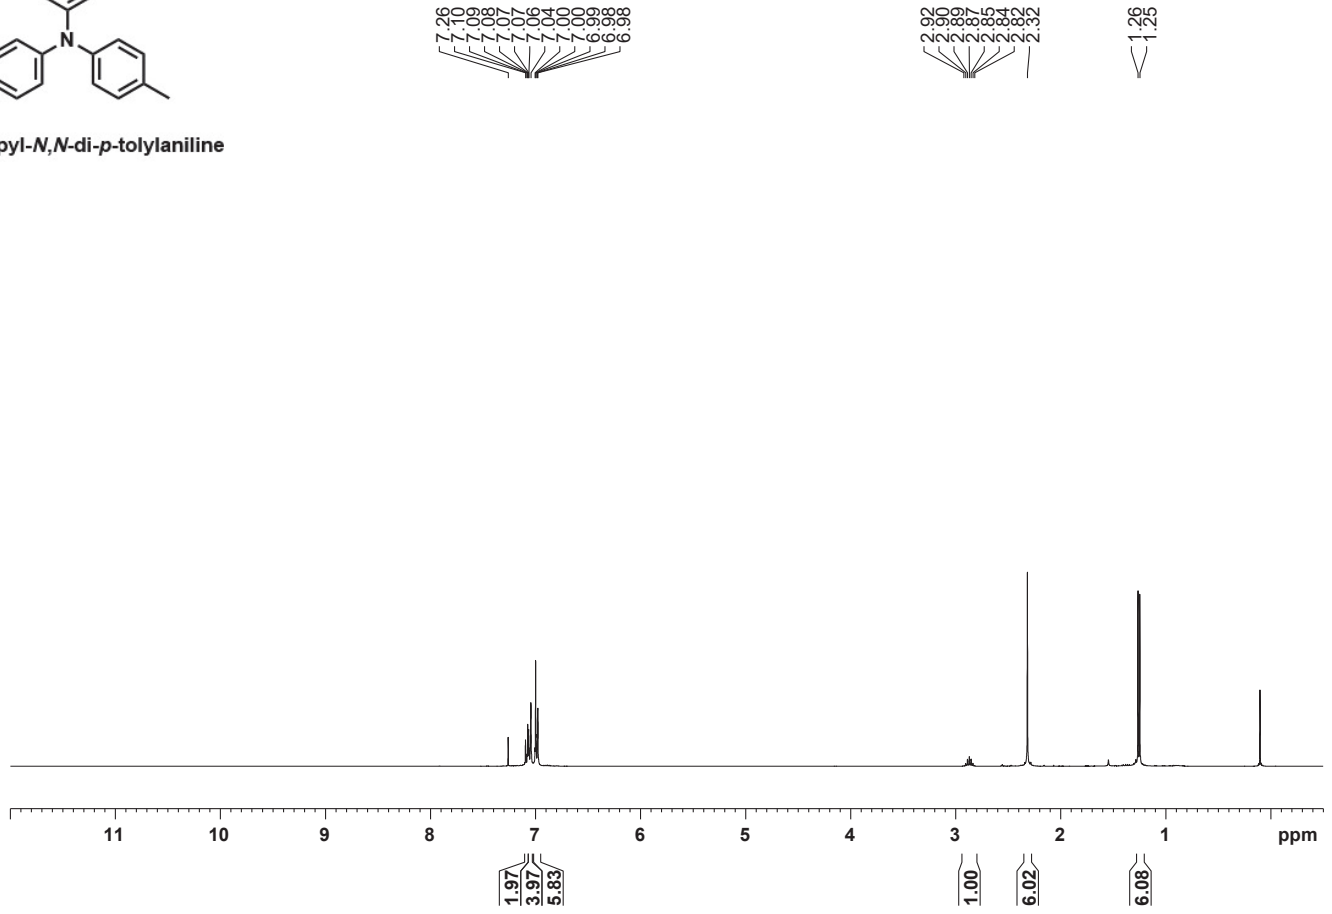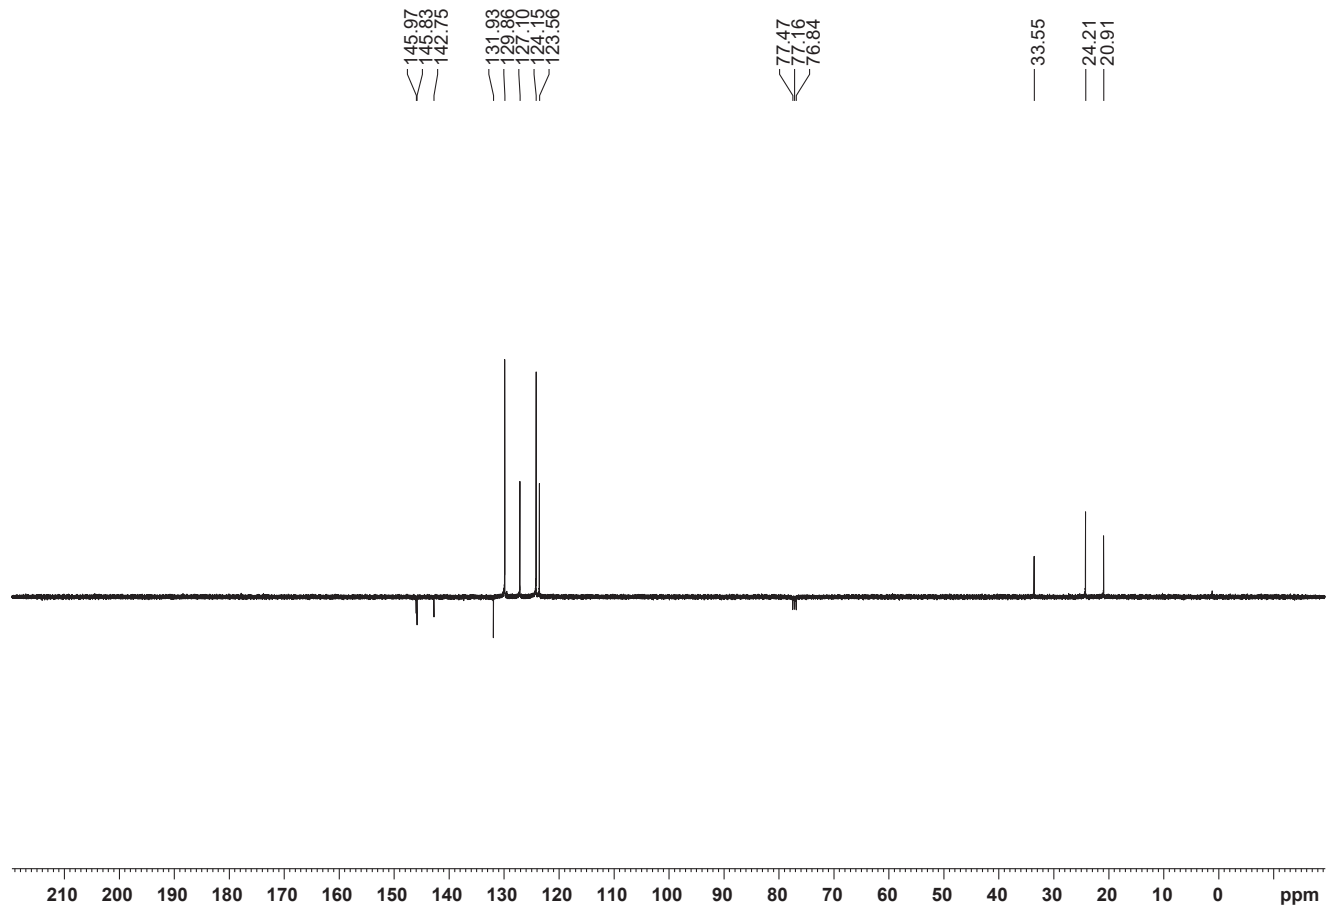

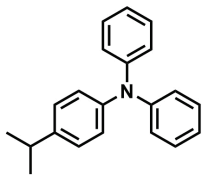

4-isopropyl-N,N-diphenylaniline

7.265  
7.233  
7.221  
7.112  
7.108  
7.089  
7.001  
6.999  
6.976

2.91  
2.887  
2.880  
2.884

1.26  
1.24

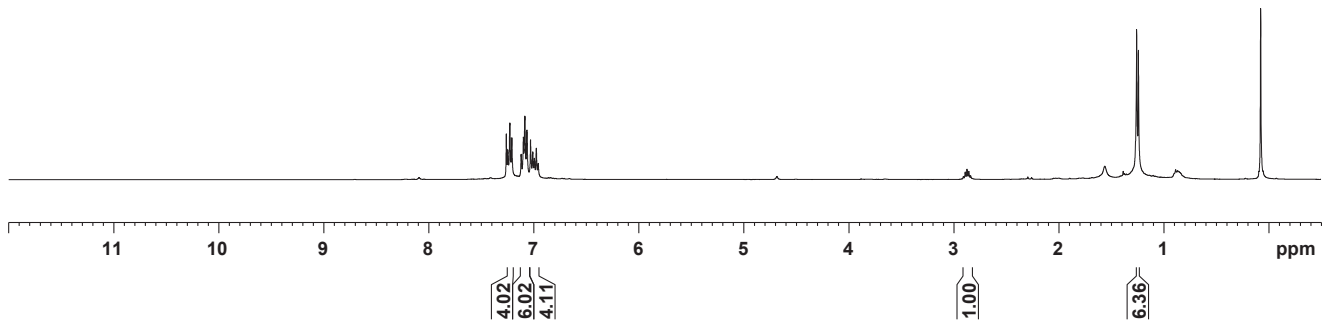

148.19  
145.52  
143.76

129.24  
127.30  
124.73  
123.88  
122.39

77.47  
77.16  
76.84

33.62

24.19

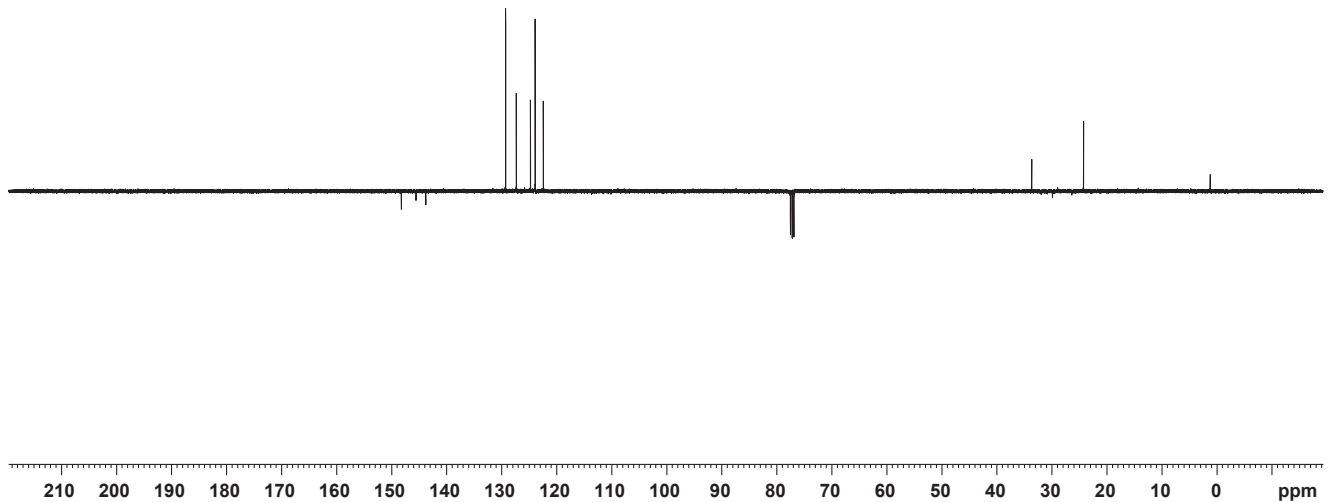

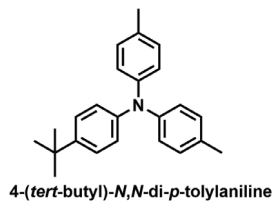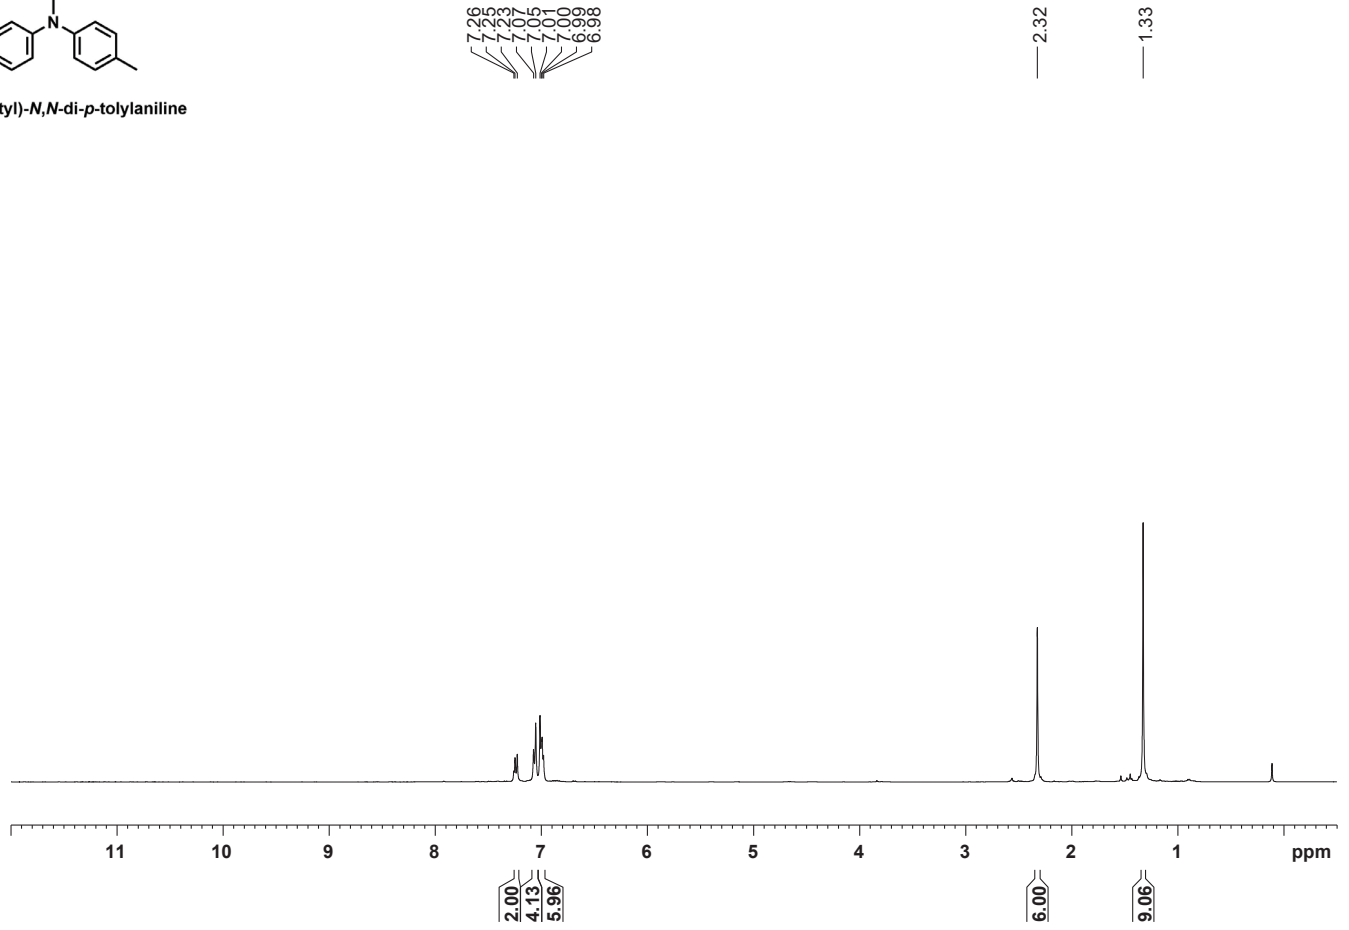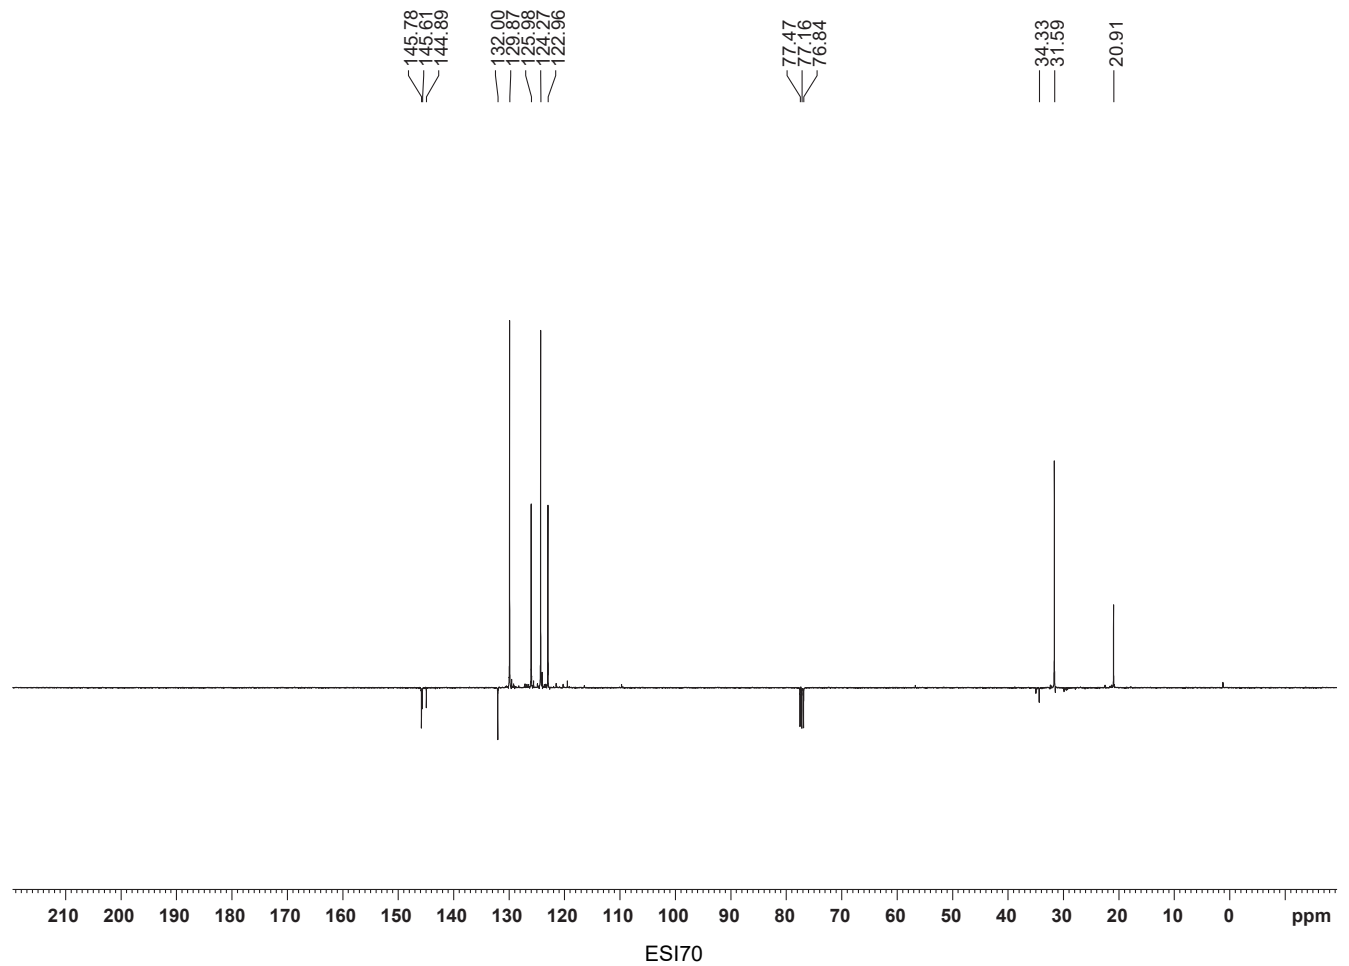

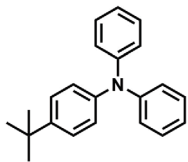

4-(*tert*-butyl)-*N,N*-diphenylaniline

7.61  
7.55  
7.54  
7.53  
7.52  
7.51  
7.03  
7.02  
7.00  
6.99  
6.98

1.31

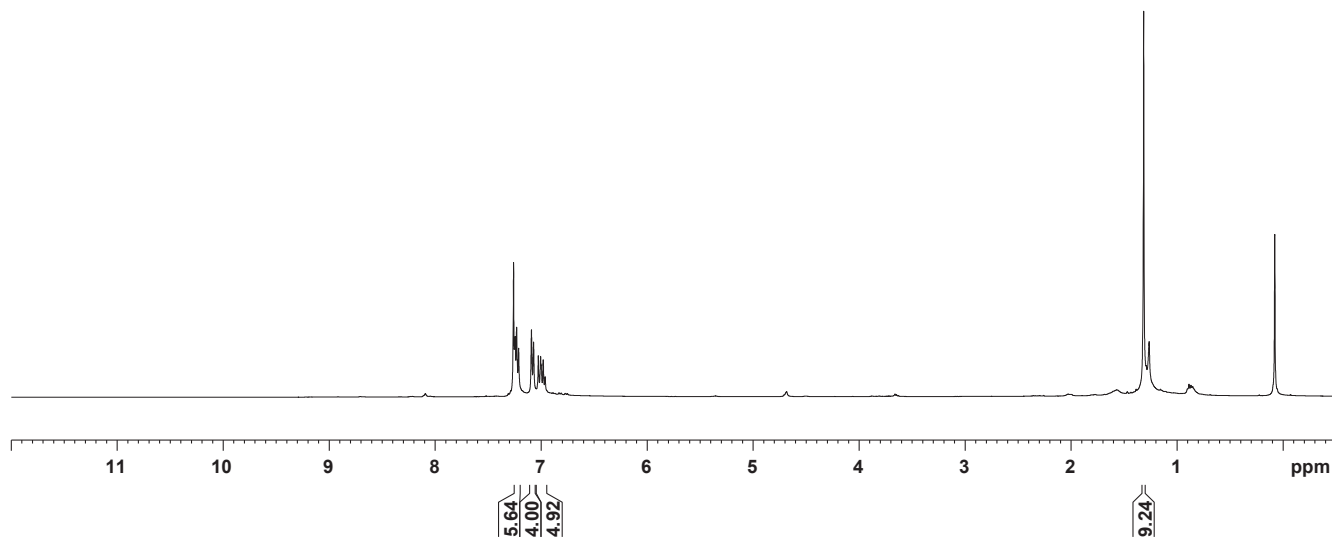

148.14  
146.90  
145.15

129.25  
126.19  
124.14  
123.98  
122.45

77.48  
77.16  
76.84

31.58

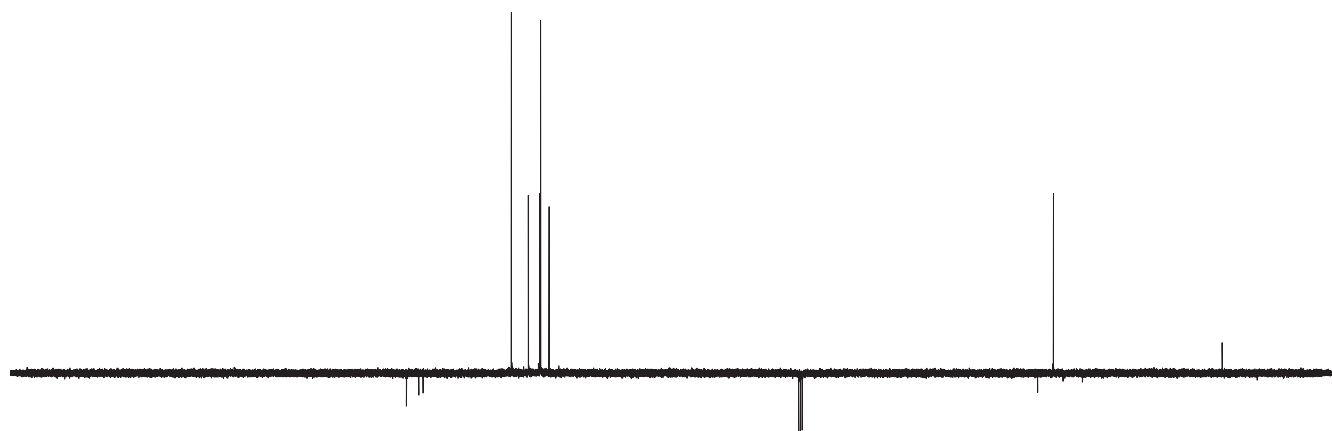

210 200 190 180 170 160 150 140 130 120 110 90 80 70 60 50 40 30 20 10 0 ppm

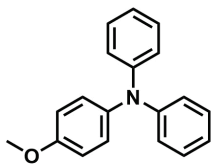

4-methoxy-N,N-diphenylaniline

7.82  
7.81  
7.80  
7.79  
7.78  
7.77  
7.76  
7.75  
7.74  
7.73  
7.72  
7.71  
7.70  
7.69  
7.68  
7.67  
7.66  
7.65  
7.64  
7.63  
7.62  
7.61  
7.60  
7.59  
7.58  
7.57  
7.56  
7.55  
7.54  
7.53  
7.52  
7.51  
7.50  
7.49  
7.48  
7.47  
7.46  
7.45  
7.44  
7.43  
7.42  
7.41  
7.40  
7.39  
7.38  
7.37  
7.36  
7.35  
7.34  
7.33  
7.32  
7.31  
7.30  
7.29  
7.28  
7.27  
7.26  
7.25  
7.24  
7.23  
7.22  
7.21  
7.20  
7.19  
7.18  
7.17  
7.16  
7.15  
7.14  
7.13  
7.12  
7.11  
7.10  
7.09  
7.08  
7.07  
7.06  
7.05  
7.04  
7.03  
7.02  
7.01  
7.00  
6.99  
6.98  
6.97  
6.96  
6.95  
6.94  
6.93  
6.92  
6.91  
6.90  
6.89  
6.88  
6.87  
6.86  
6.85  
6.84  
6.83  
6.82  
6.81  
6.80  
6.79  
6.78  
6.77  
6.76  
6.75  
6.74  
6.73  
6.72  
6.71  
6.70  
6.69  
6.68  
6.67  
6.66  
6.65  
6.64  
6.63  
6.62  
6.61  
6.60  
6.59  
6.58  
6.57  
6.56  
6.55  
6.54  
6.53  
6.52  
6.51  
6.50  
6.49  
6.48  
6.47  
6.46  
6.45  
6.44  
6.43  
6.42  
6.41  
6.40  
6.39  
6.38  
6.37  
6.36  
6.35  
6.34  
6.33  
6.32  
6.31  
6.30  
6.29  
6.28  
6.27  
6.26  
6.25  
6.24  
6.23  
6.22  
6.21  
6.20  
6.19  
6.18  
6.17  
6.16  
6.15  
6.14  
6.13  
6.12  
6.11  
6.10  
6.09  
6.08  
6.07  
6.06  
6.05  
6.04  
6.03  
6.02  
6.01  
6.00  
5.99  
5.98  
5.97  
5.96  
5.95  
5.94  
5.93  
5.92  
5.91  
5.90  
5.89  
5.88  
5.87  
5.86  
5.85  
5.84  
5.83  
5.82  
5.81  
5.80  
5.79  
5.78  
5.77  
5.76  
5.75  
5.74  
5.73  
5.72  
5.71  
5.70  
5.69  
5.68  
5.67  
5.66  
5.65  
5.64  
5.63  
5.62  
5.61  
5.60  
5.59  
5.58  
5.57  
5.56  
5.55  
5.54  
5.53  
5.52  
5.51  
5.50  
5.49  
5.48  
5.47  
5.46  
5.45  
5.44  
5.43  
5.42  
5.41  
5.40  
5.39  
5.38  
5.37  
5.36  
5.35  
5.34  
5.33  
5.32  
5.31  
5.30  
5.29  
5.28  
5.27  
5.26  
5.25  
5.24  
5.23  
5.22  
5.21  
5.20  
5.19  
5.18  
5.17  
5.16  
5.15  
5.14  
5.13  
5.12  
5.11  
5.10  
5.09  
5.08  
5.07  
5.06  
5.05  
5.04  
5.03  
5.02  
5.01  
5.00  
4.99  
4.98  
4.97  
4.96  
4.95  
4.94  
4.93  
4.92  
4.91  
4.90  
4.89  
4.88  
4.87  
4.86  
4.85  
4.84  
4.83  
4.82  
4.81  
4.80  
4.79  
4.78  
4.77  
4.76  
4.75  
4.74  
4.73  
4.72  
4.71  
4.70  
4.69  
4.68  
4.67  
4.66  
4.65  
4.64  
4.63  
4.62  
4.61  
4.60  
4.59  
4.58  
4.57  
4.56  
4.55  
4.54  
4.53  
4.52  
4.51  
4.50  
4.49  
4.48  
4.47  
4.46  
4.45  
4.44  
4.43  
4.42  
4.41  
4.40  
4.39  
4.38  
4.37  
4.36  
4.35  
4.34  
4.33  
4.32  
4.31  
4.30  
4.29  
4.28  
4.27  
4.26  
4.25  
4.24  
4.23  
4.22  
4.21  
4.20  
4.19  
4.18  
4.17  
4.16  
4.15  
4.14  
4.13  
4.12  
4.11  
4.10  
4.09  
4.08  
4.07  
4.06  
4.05  
4.04  
4.03  
4.02  
4.01  
4.00  
3.99  
3.98  
3.97  
3.96  
3.95  
3.94  
3.93  
3.92  
3.91  
3.90  
3.89  
3.88  
3.87  
3.86  
3.85  
3.84  
3.83  
3.82  
3.81  
3.80  
3.79  
3.78  
3.77  
3.76  
3.75  
3.74  
3.73  
3.72  
3.71  
3.70  
3.69  
3.68  
3.67  
3.66  
3.65  
3.64  
3.63  
3.62  
3.61  
3.60  
3.59  
3.58  
3.57  
3.56  
3.55  
3.54  
3.53  
3.52  
3.51  
3.50  
3.49  
3.48  
3.47  
3.46  
3.45  
3.44  
3.43  
3.42  
3.41  
3.40  
3.39  
3.38  
3.37  
3.36  
3.35  
3.34  
3.33  
3.32  
3.31  
3.30  
3.29  
3.28  
3.27  
3.26  
3.25  
3.24  
3.23  
3.22  
3.21  
3.20  
3.19  
3.18  
3.17  
3.16  
3.15  
3.14  
3.13  
3.12  
3.11  
3.10  
3.09  
3.08  
3.07  
3.06  
3.05  
3.04  
3.03  
3.02  
3.01  
3.00  
2.99  
2.98  
2.97  
2.96  
2.95  
2.94  
2.93  
2.92  
2.91  
2.90  
2.89  
2.88  
2.87  
2.86  
2.85  
2.84  
2.83  
2.82  
2.81  
2.80  
2.79  
2.78  
2.77  
2.76  
2.75  
2.74  
2.73  
2.72  
2.71  
2.70  
2.69  
2.68  
2.67  
2.66  
2.65  
2.64  
2.63  
2.62  
2.61  
2.60  
2.59  
2.58  
2.57  
2.56  
2.55  
2.54  
2.53  
2.52  
2.51  
2.50  
2.49  
2.48  
2.47  
2.46  
2.45  
2.44  
2.43  
2.42  
2.41  
2.40  
2.39  
2.38  
2.37  
2.36  
2.35  
2.34  
2.33  
2.32  
2.31  
2.30  
2.29  
2.28  
2.27  
2.26  
2.25  
2.24  
2.23  
2.22  
2.21  
2.20  
2.19  
2.18  
2.17  
2.16  
2.15  
2.14  
2.13  
2.12  
2.11  
2.10  
2.09  
2.08  
2.07  
2.06  
2.05  
2.04  
2.03  
2.02  
2.01  
2.00  
1.99  
1.98  
1.97  
1.96  
1.95  
1.94  
1.93  
1.92  
1.91  
1.90  
1.89  
1.88  
1.87  
1.86  
1.85  
1.84  
1.83  
1.82  
1.81  
1.80  
1.79  
1.78  
1.77  
1.76  
1.75  
1.74  
1.73  
1.72  
1.71  
1.70  
1.69  
1.68  
1.67  
1.66  
1.65  
1.64  
1.63  
1.62  
1.61  
1.60  
1.59  
1.58  
1.57  
1.56  
1.55  
1.54  
1.53  
1.52  
1.51  
1.50  
1.49  
1.48  
1.47  
1.46  
1.45  
1.44  
1.43  
1.42  
1.41  
1.40  
1.39  
1.38  
1.37  
1.36  
1.35  
1.34  
1.33  
1.32  
1.31  
1.30  
1.29  
1.28  
1.27  
1.26  
1.25  
1.24  
1.23  
1.22  
1.21  
1.20  
1.19  
1.18  
1.17  
1.16  
1.15  
1.14  
1.13  
1.12  
1.11  
1.10  
1.09  
1.08  
1.07  
1.06  
1.05  
1.04  
1.03  
1.02  
1.01  
1.00  
0.99  
0.98  
0.97  
0.96  
0.95  
0.94  
0.93  
0.92  
0.91  
0.90  
0.89  
0.88  
0.87  
0.86  
0.85  
0.84  
0.83  
0.82  
0.81  
0.80  
0.79  
0.78  
0.77  
0.76  
0.75  
0.74  
0.73  
0.72  
0.71  
0.70  
0.69  
0.68  
0.67  
0.66  
0.65  
0.64  
0.63  
0.62  
0.61  
0.60  
0.59  
0.58  
0.57  
0.56  
0.55  
0.54  
0.53  
0.52  
0.51  
0.50  
0.49  
0.48  
0.47  
0.46  
0.45  
0.44  
0.43  
0.42  
0.41  
0.40  
0.39  
0.38  
0.37  
0.36  
0.35  
0.34  
0.33  
0.32  
0.31  
0.30  
0.29  
0.28  
0.27  
0.26  
0.25  
0.24  
0.23  
0.22  
0.21  
0.20  
0.19  
0.18  
0.17  
0.16  
0.15  
0.14  
0.13  
0.12  
0.11  
0.10  
0.09  
0.08  
0.07  
0.06  
0.05  
0.04  
0.03  
0.02  
0.01  
0.00

— 3.81

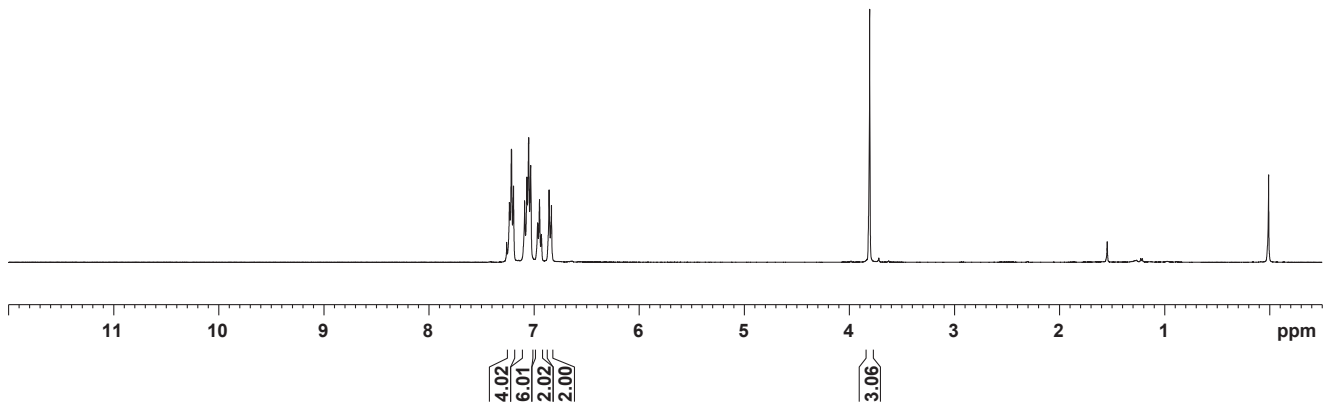

— 156.28  
— 148.31  
— 140.91  
— 129.20  
— 127.45  
— 123.01  
— 121.96  
— 114.88  
— 77.48  
— 77.16  
— 76.84  
— 55.61

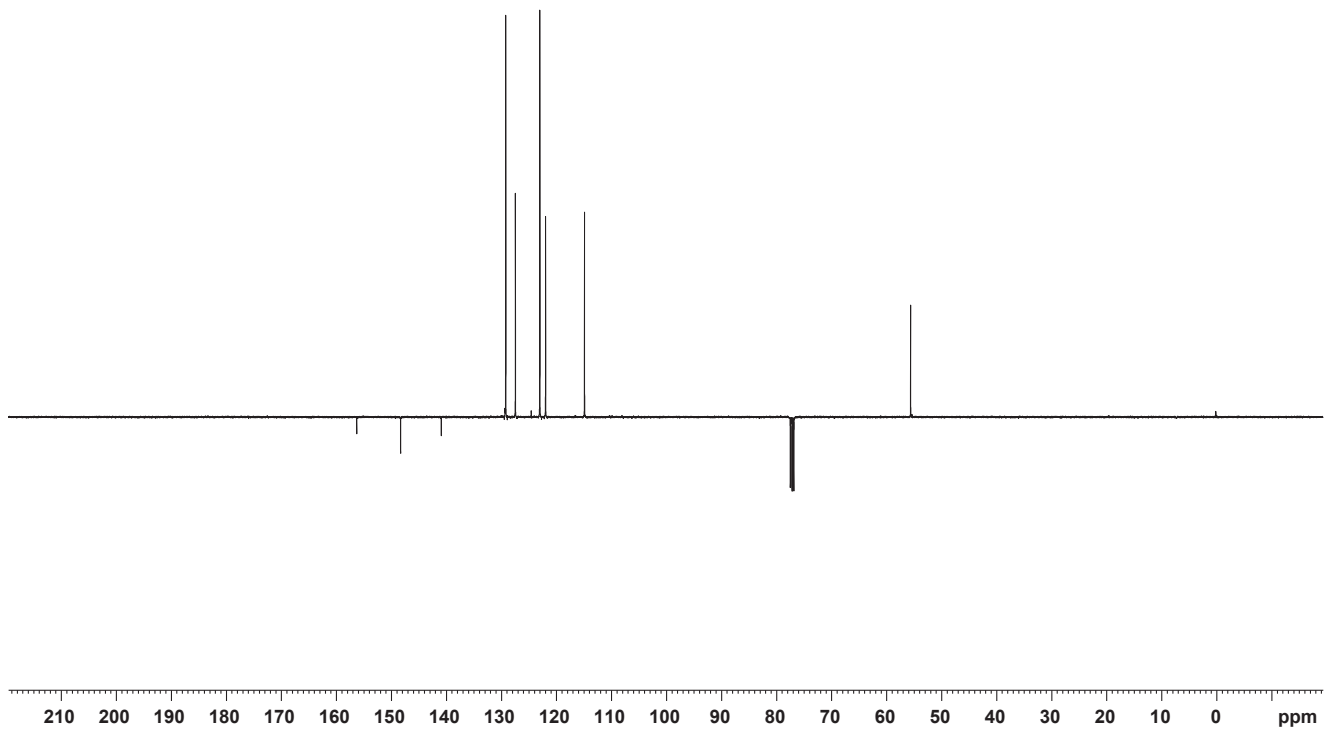

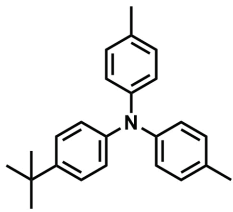

4-(*tert*-butyl)-*N,N*-di-*p*-tolylaniline

7.26  
7.04  
7.03  
7.02  
6.99  
6.98  
6.97

— 3.79

— 2.29

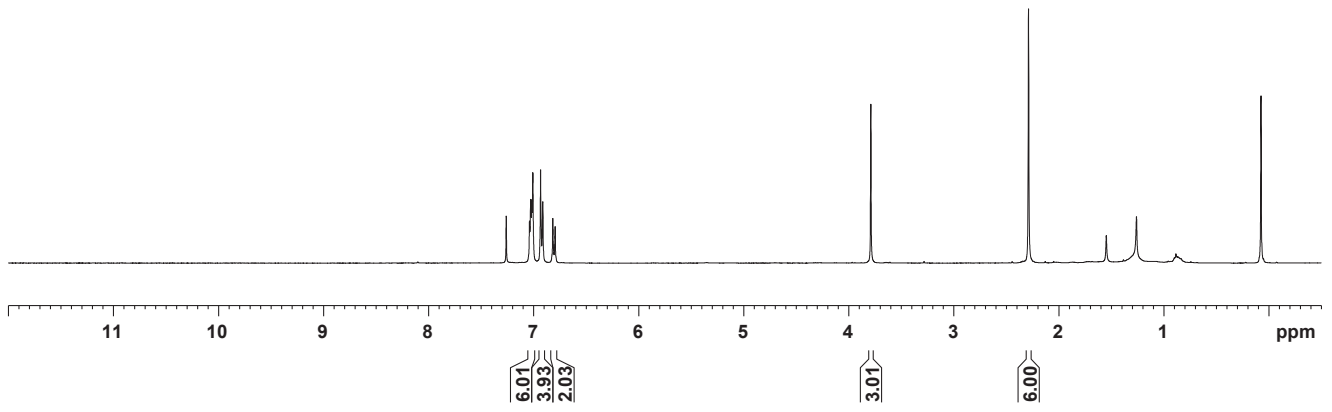

— 155.74

— 146.07

— 141.47

— 131.39

— 129.80

— 126.56

— 123.20

— 114.73

77.48  
77.16  
76.84

— 55.62

— 20.85

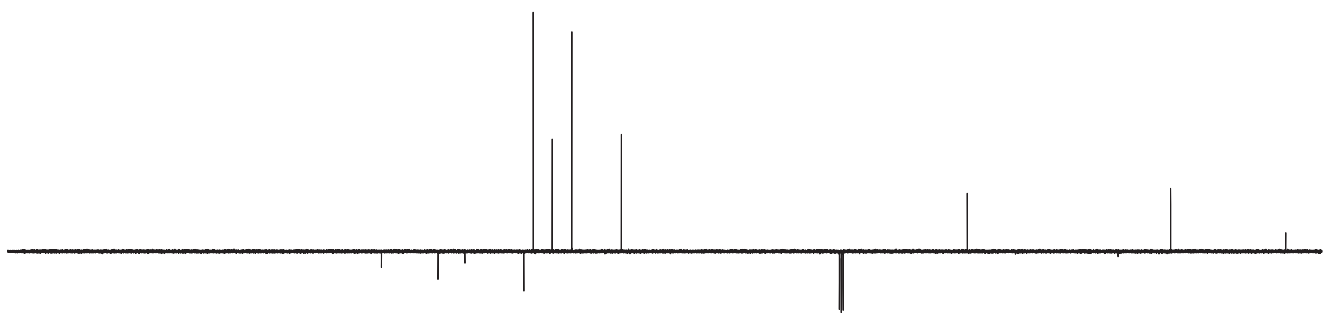

210 200 190 180 170 160 150 140 130 120 110 100 90 80 70 60 50 40 30 20 10 ppm

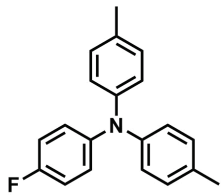

4-fluoro-*N,N*-di-*p*-tolylaniline

7.26  
7.103  
7.102  
7.01  
7.005  
6.993  
6.990

— 2.30

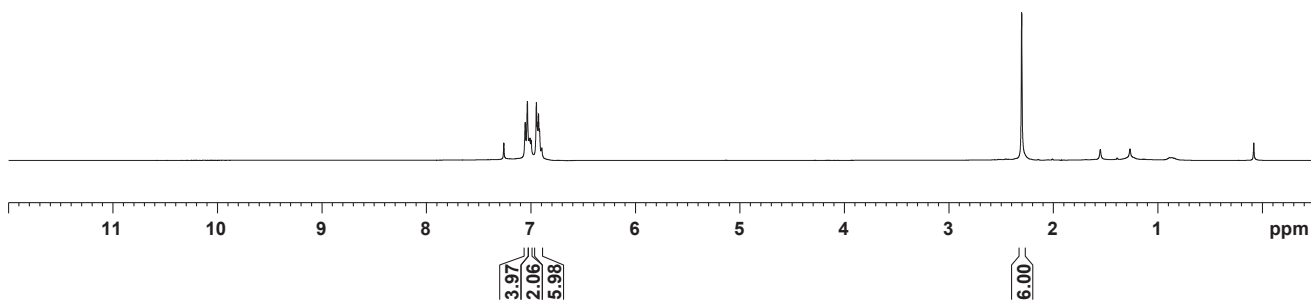

20.94  
20.95  
20.96  
20.97  
20.98  
20.99  
21.00  
21.01

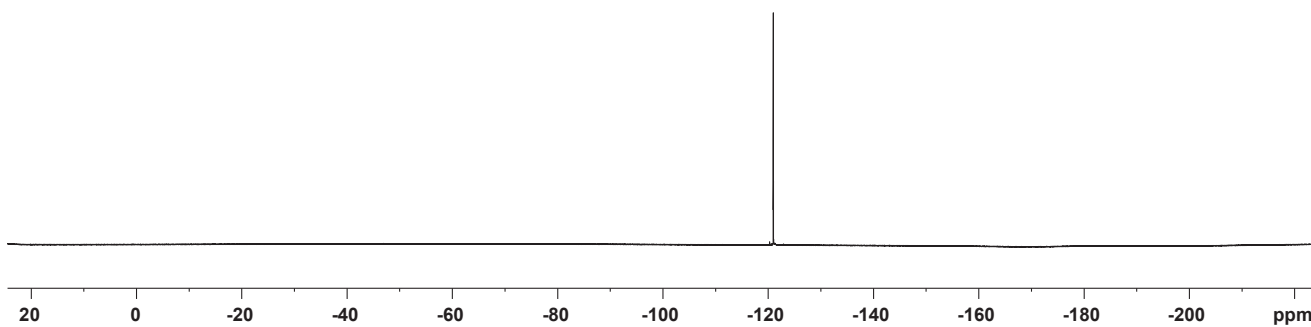

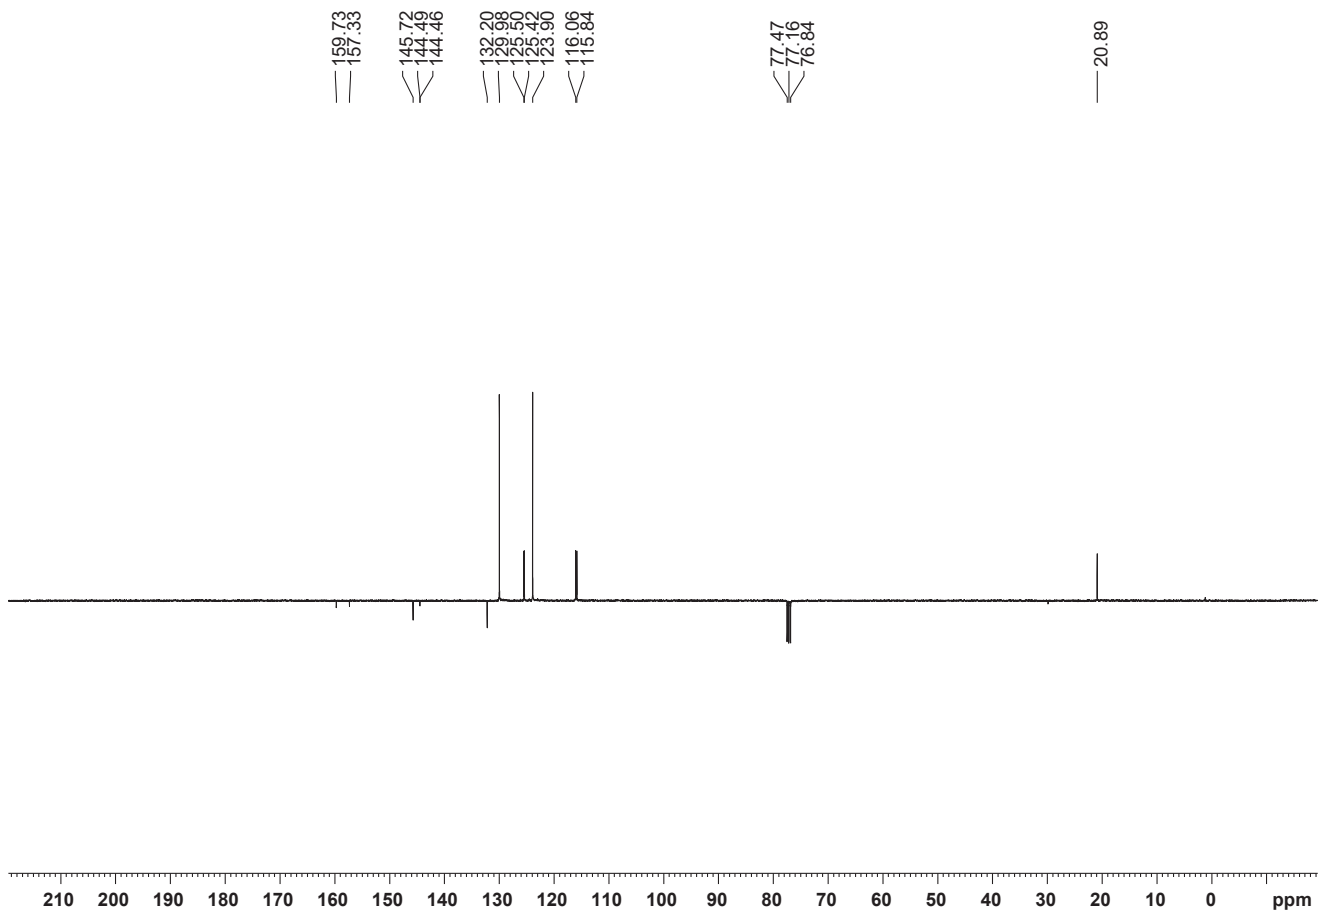

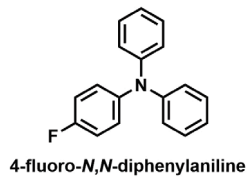

7.26  
7.25  
7.23  
7.21  
7.18  
7.17  
7.16  
7.15  
7.13  
7.11  
7.09  
7.08  
7.06  
7.05  
7.03  
7.01  
6.99  
6.98  
6.97  
6.96

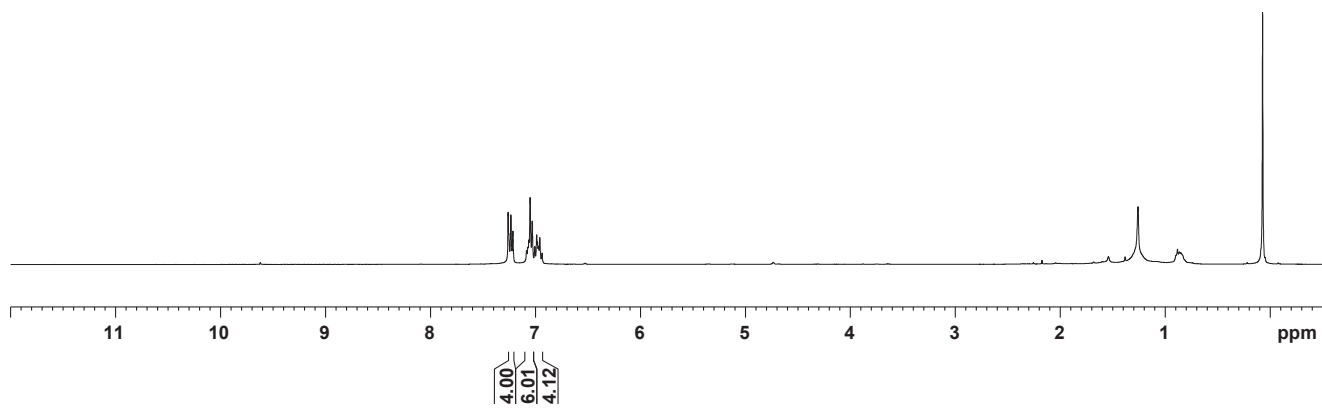

-119.72

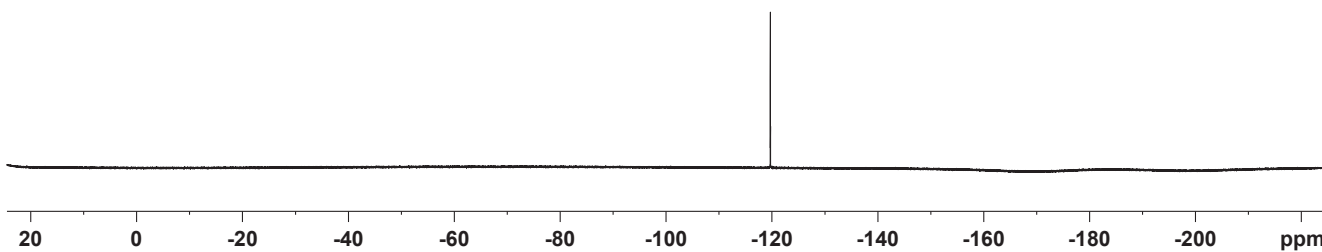

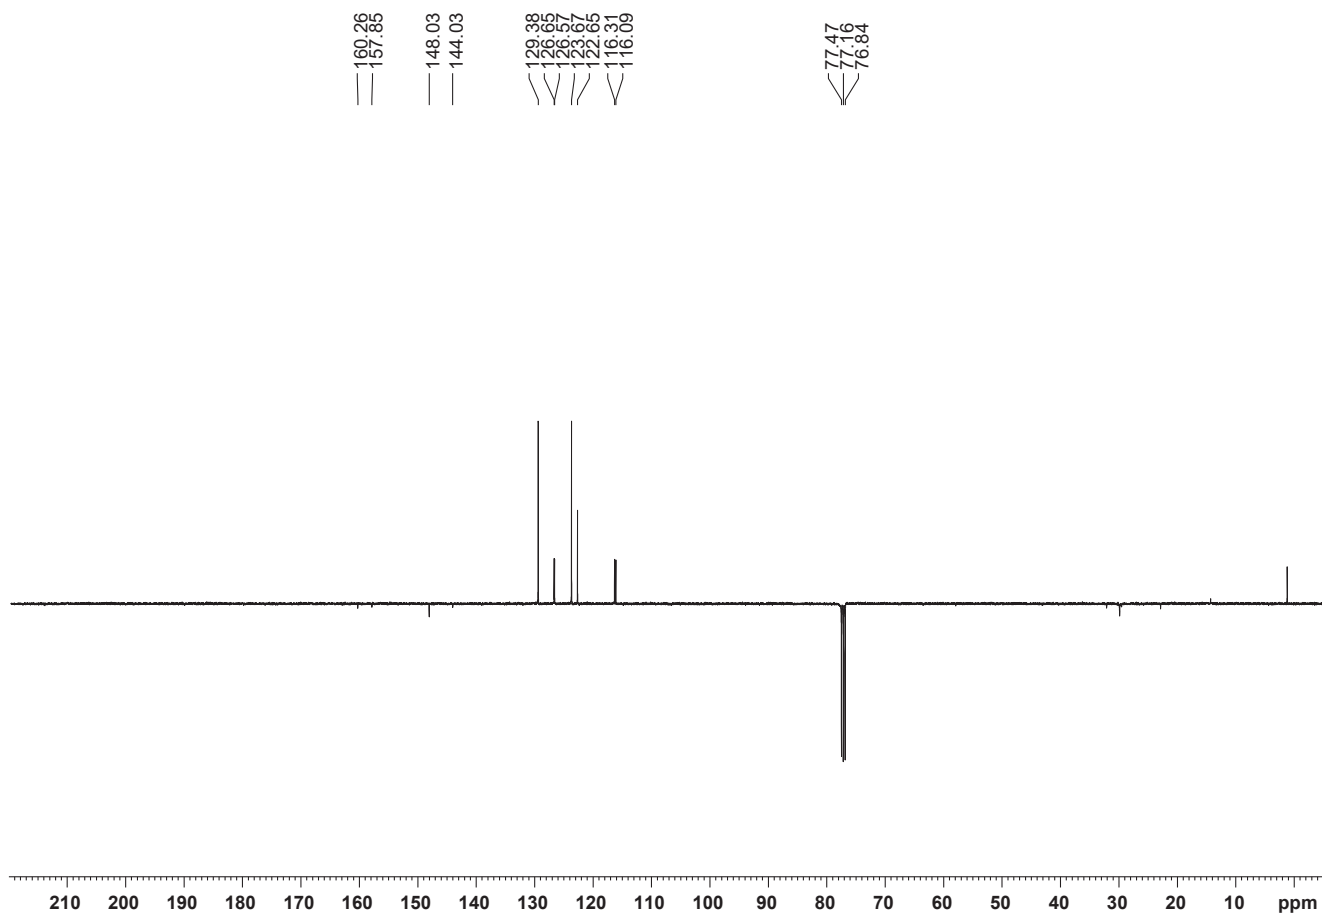

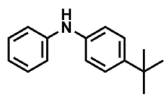

4-(tert-butyl)-N-phenylaniline

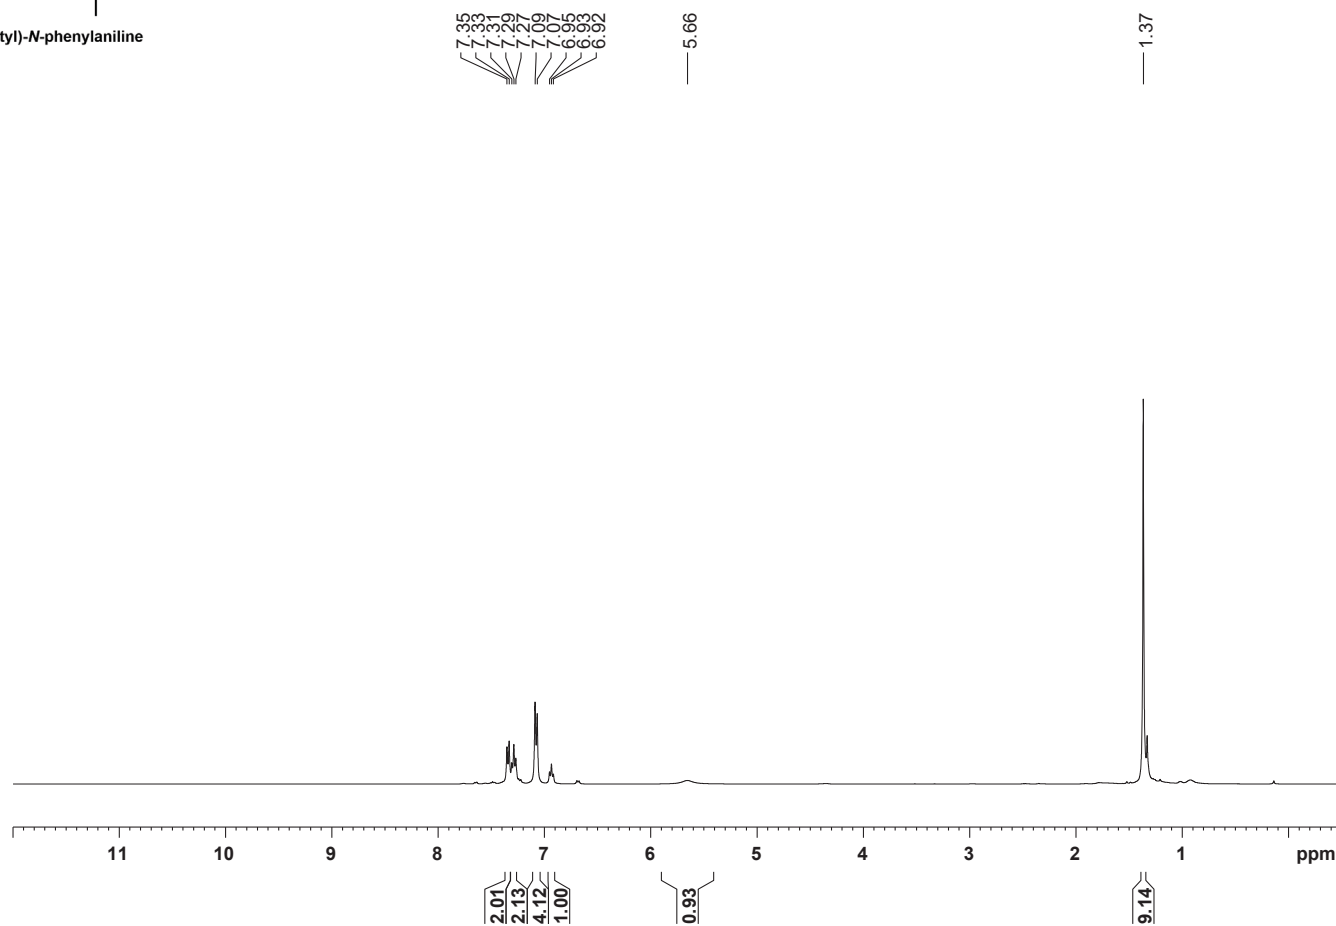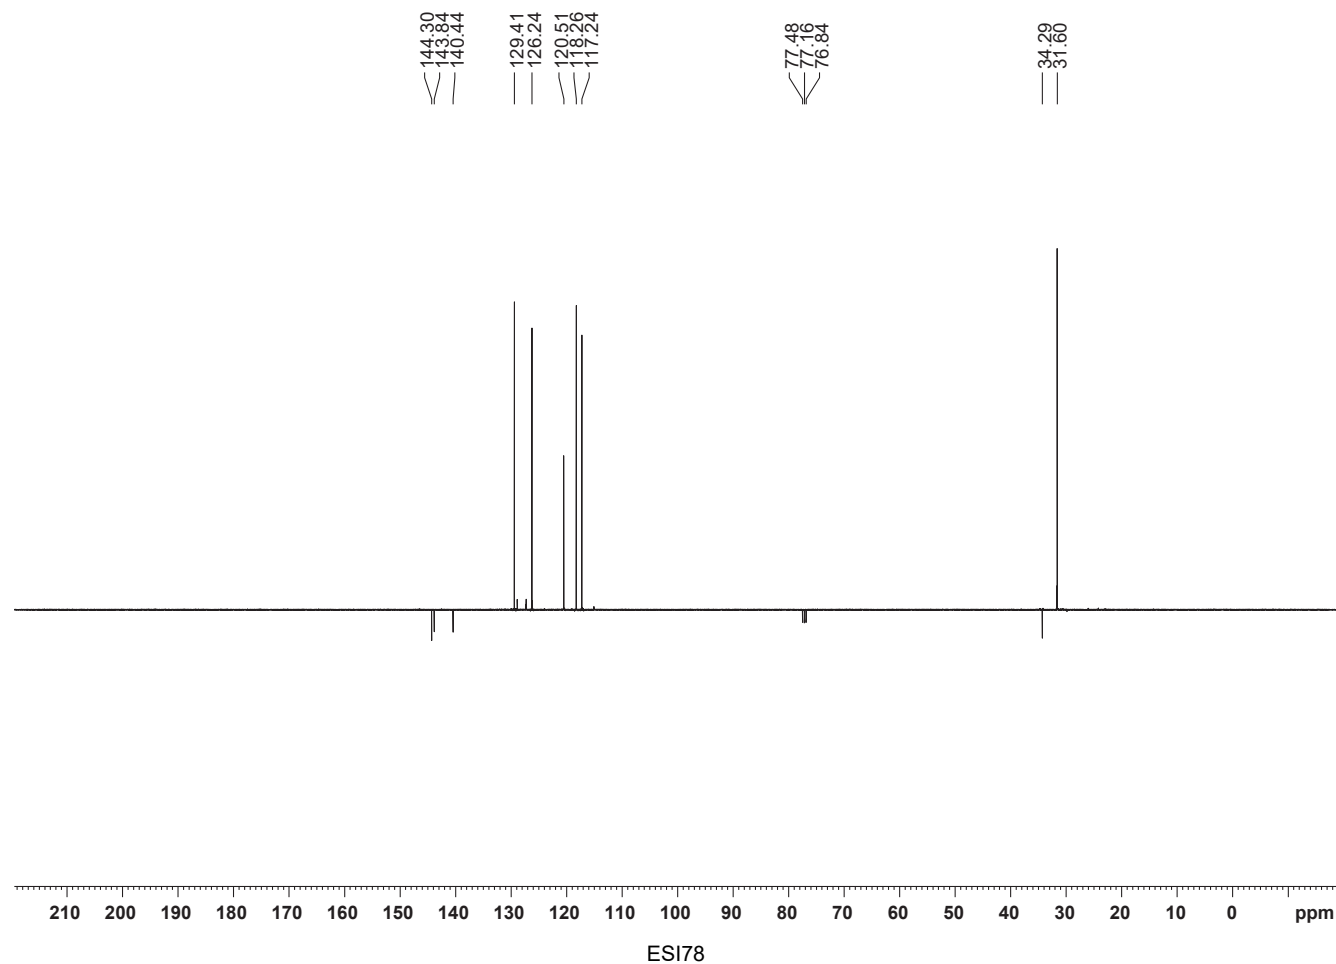

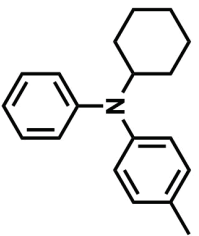

**N-cyclohexyl-4-methyl-N-phenylaniline**

ESI79

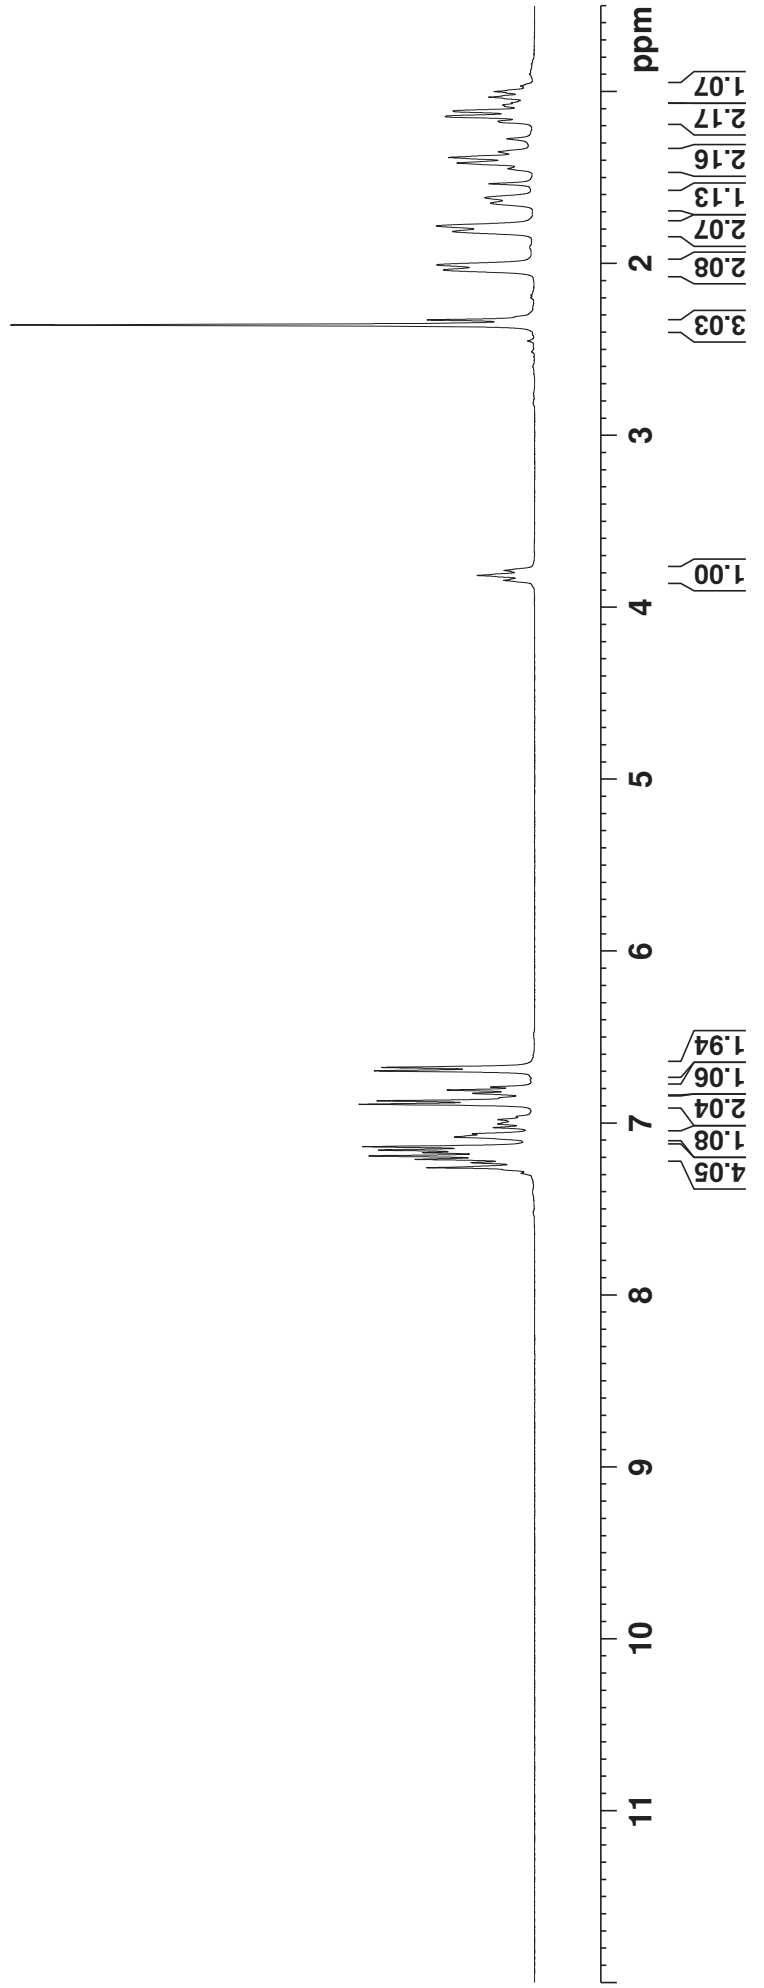

Supplement: d6gc00900j1.pdf [file d6gc00900j1.pdf]
